# Supplementary material for: Bibliometric and visual analysis of single-cell multiomics in neurodegenerative disease arrest studies
Source: Front Neurol. 2024 Oct 8;15:1450663. doi: 10.3389/fneur.2024.1450663 (PMC11493674; doi:10.3389/fneur.2024.1450663)
Supplement: Supplementary file 1 [file Table_1.XLS]

## Sheet: savedrecs
Single-cell sequencing methods	Disease	Specie	Organism	Datasets ID	Authors	Author Full Names	Article Title	Source Title	Author Keywords	Keywords Plus	Affiliations	Times Cited, WoS Core	Journal ISO Abbreviation	Publication Date	Publication Year	DOI	WoS Categories	Research Areas
scRNA-seq	Alzheimer's disease	human	prefrontal cortex	syn18485175	Mathys, H; Davila-Velderrain, J; Peng, ZY; Gao, F; Mohammadi, S; Young, JZ; Menon, M; He, L; Abdurrob, F; Jiang, XQ; Martorell, AJ; Ransohoff, RM; Hafler, BP; Bennett, DA; Kellis, M; Tsai, LH	Mathys, Hansruedi; Davila-Velderrain, Jose; Peng, Zhuyu; Gao, Fan; Mohammadi, Shahin; Young, Jennie Z.; Menon, Madhvi; He, Liang; Abdurrob, Fatema; Jiang, Xueqiao; Martorell, Anthony J.; Ransohoff, Richard M.; Hafler, Brian P.; Bennett, David A.; Kellis, Manolis; Tsai, Li-Huei	Single-cell transcriptomic analysis of Alzheimer's disease	NATURE		COGNITIVE IMPAIRMENT; RNA-SEQ; MICROGLIA; NEUROPATHOLOGY; PROTEOSTASIS; MYELINATION; EXPRESSION; LINGO-1; HUMANS; AXONS	Massachusetts Institute of Technology (MIT); Massachusetts Institute of Technology (MIT); Massachusetts Institute of Technology (MIT); Harvard University; Massachusetts Institute of Technology (MIT); Broad Institute; Harvard University; Harvard Medical School; Harvard University; Harvard Medical School; Harvard University; Harvard Medical School; Rush University	1213	Nature	JUN 20	2019	10.1038/s41586-019-1195-2	Multidisciplinary Sciences	Science & Technology - Other Topics
scRNA-seq	neuroinflammation	mouse	postmortem brain	GSE121654	Hammond, TR; Dufort, C; Dissing-Olesen, L; Giera, S; Young, A; Wysoker, A; Walker, AJ; Gergits, F; Segel, M; Nemesh, J; Marsh, SE; Saunders, A; Macosko, E; Ginhoux, F; Chen, JM; Franklin, RJM; Piao, XH; McCarroll, SA; Stevens, B	Hammond, Timothy R.; Dufort, Connor; Dissing-Olesen, Lasse; Giera, Stefanie; Young, Adam; Wysoker, Alec; Walker, Alec J.; Gergits, Frederick; Segel, Michael; Nemesh, James; Marsh, Samuel E.; Saunders, Arpiar; Macosko, Evan; Ginhoux, Florent; Chen, Jinmiao; Franklin, Robin J. M.; Piao, Xianhua; McCarroll, Steven A.; Stevens, Beth	Single-Cell RNA Sequencing of Microglia throughout the Mouse Lifespan and in the Injured Brain Reveals Complex Cell-State Changes	IMMUNITY		CHEMOKINE RECEPTORS; COMMON VARIANTS; ADULT MICROGLIA; DENDRITIC CELL; M2 MICROGLIA; ACTIVATION; MYELINOGENESIS; NEUROTOXICITY; MACROPHAGES; REGULATOR	Harvard University; Boston Children's Hospital; Harvard University; Harvard Medical School; Harvard University; Massachusetts Institute of Technology (MIT); Broad Institute; Harvard University; Boston Children's Hospital; Howard Hughes Medical Institute; Harvard University; Harvard Medical School; University of Cambridge; Harvard University; Boston Children's Hospital; Agency for Science Technolo…	1149	Immunity	JAN 15	2019	10.1016/j.immuni.2018.11.004	Immunology	Immunology
scRNA-seq	neuroinflammation	mouse	cortex, cerebellum, hippocampus, striatum, olfactory bulb, choroid plexus	www.brainrnaseq.org	Li, QY; Cheng, ZL; Zhou, L; Darmanis, S; Neff, NF; Okamoto, J; Gulati, G; Bennett, ML; Sun, LO; Clarke, LE; Marschallinger, J; Yu, GQ; Quake, SR; Wyss-Coray, T; Barres, BA	Li, Qingyun; Cheng, Zuolin; Zhou, Lu; Darmanis, Spyros; Neff, Norma F.; Okamoto, Jennifer; Gulati, Gunsagar; Bennett, Mariko L.; Sun, Lu O.; Clarke, Laura E.; Marschallinger, Julia; Yu, Guoqiang; Quake, Stephen R.; Wyss-Coray, Tony; Barres, Ben A.	Developmental Heterogeneity of Microglia and Brain Myeloid Cells Revealed by Deep Single-Cell RNA Sequencing	NEURON		CENTRAL-NERVOUS-SYSTEM; EXPRESSION; SURVIVAL; DEATH; FATE; MYELINOGENESIS; IDENTIFICATION; TRANSCRIPTOME; MACROPHAGES; DIVERSITY	Stanford University; Virginia Polytechnic Institute & State University; Stanford University; Stanford University; Stanford University; Stanford University	588	Neuron	JAN 16	2019	10.1016/j.neuron.2018.12.006	Neurosciences	Neurosciences & Neurology
scRNA-seq	atherosclerosis	mouse	aorta	GSE97310	Cochain, C; Vafadarnejad, E; Arampatzi, P; Pelisek, J; Winkels, H; Ley, K; Wolf, D; Saliba, AE; Zernecke, A	Cochain, Clement; Vafadarnejad, Ehsan; Arampatzi, Panagiota; Pelisek, Jaroslav; Winkels, Holger; Ley, Klaus; Wolf, Dennis; Saliba, Antoine-Emmanuel; Zernecke, Alma	Single-Cell RNA-Seq Reveals the Transcriptional Landscape and Heterogeneity of Aortic Macrophages in Murine Atherosclerosis	CIRCULATION RESEARCH	atherosclerosis; inflammation; leukocyte; macrophage; mice; single-cell RNA sequencing	ALZHEIMERS-DISEASE; APOLIPOPROTEIN-E; DEFICIENT MICE; CIRCULATING MONOCYTES; VASCULAR INFLAMMATION; RESIDENT MACROPHAGES; GENE-EXPRESSION; DENDRITIC CELLS; BONE-MARROW; CHOLESTEROL	University of Wurzburg; University of Wurzburg; University of Wurzburg; Technical University of Munich; La Jolla Institute for Immunology; University of Hamburg; University Medical Center Hamburg-Eppendorf; Universitats Herzzentrum Freiburg; University of Freiburg	541	Circ.Res.	JUN 8	2018	10.1161/CIRCRESAHA.117.312509	Cardiac & Cardiovascular Systems; Hematology; Peripheral Vascular Disease	Cardiovascular System & Cardiology; Hematology
scRNA-seq	multiple sclerosis	mouse	leptomeninges, perivascular space and parenchyma, choroid plexus	GSE118948	Jordao, MJC; Sankowski, R; Brendecke, SM; Sagar; Locatelli, G; Tai, YH; Tay, TL; Schramm, E; Armbruster, S; Hagemeyer, N; Gross, O; Mai, D; Çiçek, Ö; Falk, T; Kerschensteiner, M; Grün, D; Prinz, M	Costa Jordao, Marta Joana; Sankowski, Roman; Brendecke, Stefanie M.; Sagar; Locatelli, Giuseppe; Tai, Yi-Heng; Tay, Tuan Leng; Schramm, Eva; Armbruster, Stephan; Hagemeyer, Nora; Gross, Olaf; Mai, Dominic; Cicek, Ozgun; Falk, Thorsten; Kerschensteiner, Martin; Grun, Dominic; Prinz, Marco	Single-cell profiling identifies myeloid cell subsets with distinct fates during neuroinflammation	SCIENCE		CENTRAL-NERVOUS-SYSTEM; DENDRITIC CELLS; MULTIPLE-SCLEROSIS; GENE-EXPRESSION; MICROGLIA; CNS; MONOCYTES; MOUSE; MACROPHAGES; REVEALS	University of Freiburg; University of Freiburg; Max Planck Society; University of Munich; University of Munich; University of Freiburg; University of Freiburg; Technical University of Munich; University of Freiburg; University of Freiburg; University of Freiburg; University of Munich; University of Freiburg; University of Oslo	531	Science	JAN 25	2019	10.1126/science.aat7554	Multidisciplinary Sciences	Science & Technology - Other Topics
scRNA-seq	Parkinson’s disease	mouse and human	ventral midbrain	GSE76381	La Manno, G; Gyllborg, D; Codeluppi, S; Nishimura, K; Salto, C; Zeisel, A; Borm, LE; Stott, SRW; Toledo, EM; Villaescusa, JC; Lönnerberg, P; Ryge, J; Barker, RA; Arenas, E; Linnarsson, S	La Manno, Gioele; Gyllborg, Daniel; Codeluppi, Simone; Nishimura, Kaneyasu; Salto, Carmen; Zeisel, Amit; Borm, Lars E.; Stott, Simon R. W.; Toledo, Enrique M.; Villaescusa, J. Carlos; Lonnerberg, Peter; Ryge, Jesper; Barker, Roger A.; Arenas, Ernest; Linnarsson, Sten	Molecular Diversity of Midbrain Development in Mouse, Human, and Stem Cells	CELL		DOPAMINERGIC-NEURONS; MESSENGER-RNA; SUBSTANTIA-NIGRA; NETWORK CONTROLS; RADIAL GLIA; GENES; BRAIN; FATE; EXPRESSION; IDENTITY	Karolinska Institutet; Karolinska Institutet; University of Cambridge; Karolinska Institutet; Karolinska University Hospital; Swiss Federal Institutes of Technology Domain; Ecole Polytechnique Federale de Lausanne	501	Cell	OCT 6	2016	10.1016/j.cell.2016.09.027	Biochemistry & Molecular Biology; Cell Biology	Biochemistry & Molecular Biology; Cell Biology
scRNA-seq	Alzheimer’s disease	mouse and human	postmortem brain plasma	GSE134578	Gate, D; Saligrama, N; Leventhal, O; Yang, AC; Unger, MS; Middeldorp, J; Chen, K; Lehallier, B; Channappa, D; De Los Santos, MB; McBride, A; Pluvinage, J; Elahi, F; Tam, GKY; Kim, Y; Greicius, M; Wagner, AD; Aigner, L; Galasko, DR; Davis, MM; Wyss-Coray, T	Gate, David; Saligrama, Naresha; Leventhal, Olivia; Yang, Andrew C.; Unger, Michael S.; Middeldorp, Jinte; Chen, Kelly; Lehallier, Benoit; Channappa, Divya; De Los Santos, Mark B.; McBride, Alisha; Pluvinage, John; Elahi, Fanny; Tam, Grace Kyin-Ye; Kim, Yongha; Greicius, Michael; Wagner, Anthony D.; Aigner, Ludwig; Galasko, Douglas R.; Davis, Mark M.; Wyss-Coray, Tony	Clonally expanded CD8 T cells patrol the cerebrospinal fluid in Alzheimer's disease	NATURE		CENTRAL MEMORY; RECEPTOR; REACTIVITY; SUBSETS; CD4(+)	Stanford University; US Department of Veterans Affairs; Veterans Health Administration (VHA); VA Palo Alto Health Care System; Stanford University; Stanford University; Stanford University; Paracelsus Private Medical University; Paracelsus Private Medical University; Utrecht University; Stanford University; Stanford University; University of California System; University of California San Francis…	491	Nature	JAN 16	2020	10.1038/s41586-019-1895-7	Multidisciplinary Sciences	Science & Technology - Other Topics
scRNA-seq	Alzheimer’s disease	mice	hippocampus	GSE103334	Mathys, H; Adaikkan, C; Gao, F; Young, JZ; Manet, E; Hemberg, M; De Jager, PL; Ransohoff, RM; Regev, A; Tsai, LH	Mathys, Hansruedi; Adaikkan, Chinnakkaruppan; Gao, Fan; Young, Jennie Z.; Manet, Elodie; Hemberg, Martin; De Jager, Philip L.; Ransohoff, Richard M.; Regev, Aviv; Tsai, Li-Huei	Temporal Tracking of Microglia Activation in Neurodegeneration at Single-Cell Resolution	CELL REPORTS		RNA-SEQ; ALZHEIMERS-DISEASE; CDK5; P25; INFLAMMATION; MACROPHAGES; EXPRESSION; RECEPTORS; ROLES; TREM2	Massachusetts Institute of Technology (MIT); Massachusetts Institute of Technology (MIT); Wellcome Trust Sanger Institute; Columbia University; Biogen; Harvard University; Massachusetts Institute of Technology (MIT); Broad Institute; Howard Hughes Medical Institute; Massachusetts Institute of Technology (MIT); Massachusetts Institute of Technology (MIT)	445	Cell Reports	OCT 10	2017	10.1016/j.celrep.2017.09.039	Cell Biology	Cell Biology
scRNA-seq	Alzheimer’s disease	mouse	liver	GSE119340, GSE129516	Xiong, XL; Kuang, H; Ansari, S; Liu, TY; Gong, JK; Wang, S; Zhao, XY; Ji, YW; Li, C; Guo, L; Zhou, LK; Chen, ZM; Leon-Mimila, P; Chung, MT; Kurabayashi, K; Opp, J; Campos-Pérez, F; Villamil-Ramírez, H; Canizales-Quinteros, S; Lyons, R; Lumeng, CN; Zhou, BY; Qi, L; Huertas-Vazquez, A; Lusis, AJ; Xu, XZS; Li, SM; Yu, YH; Li, JZ; Lin, JD	Xiong, Xuelian; Kuang, Henry; Ansari, Sahar; Liu, Tongyu; Gong, Jianke; Wang, Shuai; Zhao, Xu-Yun; Ji, Yewei; Li, Chuan; Guo, Liang; Zhou, Linkang; Chen, Zhimin; Leon-Mimila, Paola; Chung, Meng Ting; Kurabayashi, Katsuo; Opp, Judy; Campos-Perez, Francisco; Villamil-Ramirez, Hugo; Canizales-Quinteros, Samuel; Lyons, Robert; Lumeng, Carey N.; Zhou, Beiyan; Qi, Ling; Huertas-Vazquez, Adriana; Lusis,…	Landscape of Intercellular Crosstalk in Healthy and NASH Liver Revealed by Single-Cell Secretome Gene Analysis	MOLECULAR CELL		HEPATIC STELLATE CELLS; MOUSE MODEL; NONALCOHOLIC STEATOHEPATITIS; ALZHEIMERS-DISEASE; DIET; EXPRESSION; HOMEOSTASIS; PHYSIOLOGY; MICROGLIA; FIBROSIS	Fudan University; University of Michigan System; University of Michigan; University of Michigan System; University of Michigan; University of Michigan System; University of Michigan; University of Michigan System; University of Michigan; Huazhong University of Science & Technology; Huazhong University of Science & Technology; Huazhong University of Science & Technology; University of Texas System…	441	Mol. Cell	AUG 8	2019	10.1016/j.molcel.2019.07.028	Biochemistry & Molecular Biology; Cell Biology	Biochemistry & Molecular Biology; Cell Biology
scRNA-seq	autoimmune encephalomyelitis	mouse	central nervous system, lymph nodes	GSE74833	Gaublomme, JT; Yosef, N; Lee, Y; Gertner, RS; Yang, LV; Wu, C; Pandolfi, PP; Mak, T; Satija, R; Shalek, AK; Kuchroo, VK; Park, H; Regev, A	Gaublomme, Jellert T.; Yosef, Nir; Lee, Youjin; Gertner, Rona S.; Yang, Li V.; Wu, Chuan; Pandolfi, Pier Paolo; Mak, Tak; Satija, Rahul; Shalek, Alex K.; Kuchroo, Vijay K.; Park, Hongkun; Regev, Aviv	Single-Cell Genomics Unveils Critical Regulators of Th17 Cell Pathogenicity	CELL		T(H)17 CELLS; MOLECULAR SIGNATURE; MULTIPLE-SCLEROSIS; FLOW-CYTOMETRY; SELF-RENEWAL; T-CELLS; RNA-SEQ; GENERATION; DIFFERENTIATION; IDENTIFICATION	Harvard University; Massachusetts Institute of Technology (MIT); Broad Institute; Harvard University; Harvard University; University of California System; University of California Berkeley; University of California System; University of California Berkeley; Harvard University; Harvard Medical School; Harvard University; Harvard Medical School; Brigham & Women's Hospital; University of North Carol…	430	Cell	DEC 6	2015	10.1016/j.cell.2015.11.009	Biochemistry & Molecular Biology; Cell Biology	Biochemistry & Molecular Biology; Cell Biology
scRNA-seq	Alzheimer’s disease	human	cerebral cortex	https://vmenon.shinyapps.io/microglia	Olah, M; Menon, V; Habib, N; Taga, MF; Ma, YY; Yung, CJ; Cimpean, M; Khairallah, A; Coronas-Samano, G; Sankowski, R; Grün, D; Kroshilina, AA; Dionne, D; Sarkis, RA; Cosgrove, GR; Helgager, J; Golden, JA; Pennell, PB; Prinz, M; Vonsattel, JPG; Teich, AF; Schneider, JA; Bennett, DA; Regev, A; Elyaman, W; Bradshaw, EM; De Jager, PL	Olah, Marta; Menon, Vilas; Habib, Naomi; Taga, Mariko F.; Ma, Yiyi; Yung, Christina J.; Cimpean, Maria; Khairallah, Anthony; Coronas-Samano, Guillermo; Sankowski, Roman; Gruen, Dominic; Kroshilina, Alexandra A.; Dionne, Danielle; Sarkis, Rani A.; Cosgrove, Garth R.; Helgager, Jeffrey; Golden, Jeffrey A.; Pennell, Page B.; Prinz, Marco; Vonsattel, Jean Paul G.; Teich, Andrew F.; Schneider, Julie A…	Single cell RNA sequencing of human microglia uncovers a subset associated with Alzheimer's disease	NATURE COMMUNICATIONS		GENE-EXPRESSION; RUSH MEMORY; ACTIVATION; PACKAGE; DECLINE	Columbia University; Columbia University; Columbia University; Harvard University; Massachusetts Institute of Technology (MIT); Broad Institute; Hebrew University of Jerusalem; Columbia University; University of Freiburg; University of Freiburg; Max Planck Society; Harvard University; Brigham & Women's Hospital; Harvard University; Brigham & Women's Hospital; Harvard University; Brigham & Women's…	324	Nat. Commun.	NOV 30	2020	10.1038/s41467-020-19737-2	Multidisciplinary Sciences	Science & Technology - Other Topics
scRNA-seq	multiple sclerosis	mice	spinal cord	GSE113973	Falcao, AM; van Bruggen, D; Marques, S; Meijer, M; Jäkel, S; Agirre, E; Samudyata; Floriddia, EM; Vanichkina, DP; Ffrench-Constant, C; Williams, A; Guerreiro-Cacais, AO; Castelo-Branco, G	Falcao, Ana Mendanha; van Bruggen, David; Marques, Sueli; Meijer, Mandy; Jakel, Sarah; Agirre, Eneritz; Samudyata; Floriddia, Elisa M.; Vanichkina, Darya P.; Ffrench-Constant, Charles; Williams, Anna; Guerreiro-Cacais, Andre Ortlieb; Castelo-Branco, Goncalo	Disease-specific oligodendrocyte lineage cells arise in multiple sclerosis	NATURE MEDICINE		GENE; PROGENITORS; REGULATOR; CYTOSCAPE; PACKAGE; LESIONS; MOUSE	Karolinska Institutet; University of Edinburgh; University of Edinburgh; University of Sydney; Centenary Institute; University of Queensland; Karolinska Institutet; Karolinska Institutet	310	Nat. Med.	DEC	2018	10.1038/s41591-018-0236-y	Biochemistry & Molecular Biology; Cell Biology; Medicine, Research & Experimental	Biochemistry & Molecular Biology; Cell Biology; Research & Experimental Medicine
scRNA-seq	Alzheimer’s disease	mice	tumor	GSE151710	Molgora, M; Esaulova, E; Vermi, W; Hou, JC; Chen, Y; Luo, JQ; Brioschi, S; Bugatti, M; Omodei, AS; Ricci, B; Fronick, C; Panda, SK; Takeuchi, Y; Gubin, MM; Faccio, R; Cella, M; Gilfillan, S; Unanue, ER; Artyomov, MN; Schreiber, RD; Colonna, M	Molgora, Martina; Esaulova, Ekaterina; Vermi, William; Hou, Jinchao; Chen, Yun; Luo, Jingqin; Brioschi, Simone; Bugatti, Mattia; Omodei, Andrea Salvatore; Ricci, Biancamaria; Fronick, Catrina; Panda, Santosh K.; Takeuchi, Yoshiko; Gubin, Matthew M.; Faccio, Roberta; Cella, Marina; Gilfillan, Susan; Unanue, Emil R.; Artyomov, Maxim N.; Schreiber, Robert D.; Colonna, Marco	TREM2 Modulation Remodels the Tumor Myeloid Landscape Enhancing Anti-PD-1 Immunotherapy	CELL		IMMUNE CHECKPOINT BLOCKADE; MICROGLIAL RESPONSE; NITRIC-OXIDE; MACROPHAGES; CELLS; LYMPHOCYTES; ACTIVATION; EXPRESSION; RECEPTOR; DISEASE	Washington University (WUSTL); University of Brescia; Siteman Cancer Center; Washington University (WUSTL); Washington University (WUSTL); Washington University (WUSTL); University of Texas System; UTMD Anderson Cancer Center; Washington University (WUSTL)	302	Cell	AUG 20	2020	10.1016/j.cell.2020.07.013	Biochemistry & Molecular Biology; Cell Biology	Biochemistry & Molecular Biology; Cell Biology
snRNA-seq;ATAC-seq;ChIP-seq(chromatin immunoprecipitation with sequencing)	multiple sclerosis	mice	neural tissue	GSE130119	Wheeler, MA; Clark, IC; Tjon, EC; Li, ZR; Zandee, SEJ; Couturier, CP; Watson, BR; Scalisi, G; Alkwai, S; Rothhammer, V; Rotem, A; Heyman, JA; Thaploo, S; Sanmarco, LM; Ragoussis, J; Weitz, DA; Petrecca, K; Moffitt, JR; Becher, B; Antel, JP; Prat, A; Quintana, FJ	Wheeler, Michael A.; Clark, Iain C.; Tjon, Emily C.; Li, Zhaorong; Zandee, Stephanie E. J.; Couturier, Charles P.; Watson, Brianna R.; Scalisi, Giulia; Alkwai, Sarah; Rothhammer, Veit; Rotem, Assaf; Heyman, John A.; Thaploo, Shravan; Sanmarco, Liliana M.; Ragoussis, Jiannis; Weitz, David A.; Petrecca, Kevin; Moffitt, Jeffrey R.; Becher, Burkhard; Antel, Jack P.; Prat, Alexandre; Quintana, Francis…	MAFG-driven astrocytes promote CNS inflammation	NATURE		CENTRAL-NERVOUS-SYSTEM; SET ENRICHMENT ANALYSIS; SINGLE-CELL GENOMICS; CYTOKINE GM-CSF; T-CELLS; READ ALIGNMENT; MESSENGER-RNA; IN-SITU; C-MAF; ACTIVATION	Harvard University; Brigham & Women's Hospital; Harvard Medical School; Harvard University; Brigham & Women's Hospital; Universite de Montreal; Universite de Montreal; McGill University; Harvard University; Boston Children's Hospital; Program in Cellular & Molecular Medicine (PCMM); Harvard University; Harvard Medical School; King Abdulaziz City for Science & Technology; Harvard University; Harva…	259	Nature	FEB	2020	10.1038/s41586-020-1999-0	Multidisciplinary Sciences	Science & Technology - Other Topics
scRNA-seq	Alzheimer’s disease	mice	postmortem brain	GSE150358	Wang, ST; Mustafa, M; Yuede, CM; Salazar, SV; Kong, P; Long, H; Ward, M; Siddiqui, O; Paul, R; Gilfillan, S; Ibrahim, A; Rhinn, H; Tassi, I; Rosenthal, A; Schwabe, T; Colonna, M	Wang, Shoutang; Mustafa, Meer; Yuede, Carla M.; Salazar, Santiago Viveros; Kong, Philip; Long, Hua; Ward, Michael; Siddiqui, Omer; Paul, Robert; Gilfillan, Susan; Ibrahim, Adiljan; Rhinn, Herve; Tassi, Ilaria; Rosenthal, Arnon; Schwabe, Tina; Colonna, Marco	Anti-human TREM2 induces microglia proliferation and reduces pathology in an Alzheimer's disease model	JOURNAL OF EXPERIMENTAL MEDICINE		MOUSE; MICE; NEURODEGENERATION; ECTODOMAIN; VARIANTS; CELLS	Washington University (WUSTL); Washington University (WUSTL)	237	J. Exp. Med.	SEP	2020	10.1084/jem.20200785	Immunology; Medicine, Research & Experimental	Immunology; Research & Experimental Medicine
scRNA-seq	neuroinflammation	human	cerebral organoids	GSE150903	Pellegrini, L; Bonfio, C; Chadwick, J; Begum, F; Skehel, M; Lancaster, MA	Pellegrini, Laura; Bonfio, Claudia; Chadwick, Jessica; Begum, Farida; Skehel, Mark; Lancaster, Madeline A.	Human CNS barrier-forming organoids with cerebrospinal fluid production	SCIENCE		CENTRAL-NERVOUS-SYSTEM; CHOROID-PLEXUS; ALZHEIMERS-DISEASE; PROTEOMIC ANALYSIS; MATRIX METALLOPROTEINASES; CEREBRAL ORGANOIDS; APOLIPOPROTEIN-E; CSF BIOMARKER; TUMOR-MARKERS; SPINAL-FLUID	MRC Laboratory Molecular Biology	219	Science	JUL 10	2020	10.1126/science.aaz5626	Multidisciplinary Sciences	Science & Technology - Other Topics
scRNA-seq	multiple sclerosis	human	cerebral spinal fluid, brain blood	GSE141797, GSE138266	Schafflick, D; Xu, CLA; Hartlehnert, M; Cole, M; Schulte-Mecklenbeck, A; Lautwein, T; Wolbert, J; Heming, M; Meuth, SG; Kuhlmann, T; Gross, CC; Wiendl, H; Yosef, N; zu Horste, GM	Schafflick, David; Xu, Chenling A.; Hartlehnert, Maike; Cole, Michael; Schulte-Mecklenbeck, Andreas; Lautwein, Tobias; Wolbert, Jolien; Heming, Michael; Meuth, Sven G.; Kuhlmann, Tanja; Gross, Catharina C.; Wiendl, Heinz; Yosef, Nir; zu Horste, Gerd Meyer	Integrated single cell analysis of blood and cerebrospinal fluid leukocytes in multiple sclerosis	NATURE COMMUNICATIONS		CENTRAL-NERVOUS-SYSTEM; REGULATORY T-CELLS; IMMUNE SURVEILLANCE; RNA-SEQ; B-CELLS; PATHOGENESIS; MACROPHAGES; DIAGNOSIS; DISEASE; SUBSET	University of Munster; University of California System; University of California Berkeley; University of California System; University of California Berkeley; University of Munster; Harvard University; Massachusetts Institute of Technology (MIT); Ragon Institute	214	Nat. Commun.	JAN 14	2020	10.1038/s41467-019-14118-w	Multidisciplinary Sciences	Science & Technology - Other Topics
scRNA-seq	Parkinson’s disease	mouse and human	mouse spinal and brain, human spinal and midbrain	GSE76514	Nichterwitz, S; Chen, G; Benitez, JA; Yilmaz, M; Storvall, H; Cao, M; Sandberg, R; Deng, QL; Hedlund, E	Nichterwitz, Susanne; Chen, Geng; Benitez, Julio Aguila; Yilmaz, Marlene; Storvall, Helena; Cao, Ming; Sandberg, Rickard; Deng, Qiaolin; Hedlund, Eva	Laser capture microscopy coupled with Smart-seq2 for precise spatial transcriptomic profiling	NATURE COMMUNICATIONS		PERIPHERAL NERVOUS-SYSTEM; NIGRA DOPAMINE NEURONS; GENE-EXPRESSION; SUBSTANTIA-NIGRA; RNA-SEQ; PARKINSONS-DISEASE; HUMAN BRAIN; STEM-CELLS; HOX GENES; MIDBRAIN	Karolinska Institutet; Karolinska Institutet; Ludwig Institute for Cancer Research	211	Nat. Commun.	JUL	2016	10.1038/ncomms12139	Multidisciplinary Sciences	Science & Technology - Other Topics
scRNA-seq	neuroinflammation	mice	hippocampus	GSE161340	Ogrodnik, M; Evans, SA; Fielder, E; Victorelli, S; Kruger, P; Salmonowicz, H; Weigand, BM; Patel, AD; Pirtskhalava, T; Inman, CL; Johnson, KO; Dickinson, SL; Rocha, A; Schafer, MJ; Zhu, Y; Allison, DB; von Zglinicki, T; LeBrasseur, NK; Tchkonia, T; Neretti, N; Passos, JF; Kirkland, JL; Jurk, D	Ogrodnik, Mikolaj; Evans, Shane A.; Fielder, Edward; Victorelli, Stella; Kruger, Patrick; Salmonowicz, Hanna; Weigand, Bettina M.; Patel, Ayush D.; Pirtskhalava, Tamar; Inman, Christine L.; Johnson, Kurt O.; Dickinson, Stephanie L.; Rocha, Azucena; Schafer, Marissa J.; Zhu, Yi; Allison, David B.; von Zglinicki, Thomas; LeBrasseur, Nathan K.; Tchkonia, Tamar; Neretti, Nicola; Passos, Joao F.; Kirk…	Whole-body senescent cell clearance alleviates age-related brain inflammation and cognitive impairment in mice	AGING CELL	aging; brain; cognition; memory; neurodegeneration; SASP; senescence; senolytic; telomeres	CENTRAL-NERVOUS-SYSTEM; AGING BRAIN; ACCUMULATION; DAMAGE; MICROGLIA; MITOCHONDRIA; SURVEILLANCE; QUERCETIN; DASATINIB	Mayo Clinic; Mayo Clinic; Brown University; Indiana University System; Indiana University Bloomington; Newcastle University - UK; Near East University	192	Aging Cell	FEB	2021	10.1111/acel.13296	Cell Biology; Geriatrics & Gerontology	Cell Biology; Geriatrics & Gerontology
scRNA-seq	neuroinflammation	mice	postmortem brain	GSE115571	Sousa, C; Golebiewska, A; Poovathingal, SK; Kaoma, T; Pires-Afonso, Y; Martina, S; Coowar, D; Azuaje, F; Skupin, A; Balling, R; Biber, K; Niclou, SP; Michelucci, A	Sousa, Carole; Golebiewska, Anna; Poovathingal, Suresh K.; Kaoma, Tony; Pires-Afonso, Yolanda; Martina, Silvia; Coowar, Djalil; Azuaje, Francisco; Skupin, Alexander; Balling, Rudi; Biber, Knut; Niclou, Simone P.; Michelucci, Alessandro	Single-cell transcriptomics reveals distinct inflammation-induced microglia signatures	EMBO REPORTS	heterogeneity; lipopolysaccharide; microglia; neuroinflammation; single-cell RNA-seq	CENTRAL-NERVOUS-SYSTEM; LARGE GENE LISTS; FACTOR-BETA-S; RNA-SEQ; ALZHEIMERS-DISEASE; MESSENGER-RNA; NEURODEGENERATIVE DISEASE; MOUSE MODEL; RAT-BRAIN; EXPRESSION	Luxembourg Institute of Health; University of Luxembourg; University of Luxembourg; KU Leuven; Flanders Institute for Biotechnology (VIB); Luxembourg Institute of Health; University of California System; University of California San Diego; University of Freiburg; University of Groningen; University of Bergen	175	EMBO Rep.	NOV	2018	10.15252/embr.201846171	Biochemistry & Molecular Biology; Cell Biology	Biochemistry & Molecular Biology; Cell Biology
scRNA-seq	Parkinson’s disease	human	midbrain	GSE157783	Smajic, S; Prada-Medina, CA; Landoulsi, Z; Ghelfi, J; Delcambre, S; Dietrich, C; Jarazo, J; Henck, J; Balachandran, S; Pachchek, S; Morris, CM; Antony, P; Timmermann, B; Sauer, S; Pereira, SL; Schwamborn, JC; May, P; Grünewald, A; Spielmann, M	Smajic, Semra; Prada-Medina, Cesar A.; Landoulsi, Zied; Ghelfi, Jenny; Delcambre, Sylvie; Dietrich, Carola; Jarazo, Javier; Henck, Jana; Balachandran, Saranya; Pachchek, Sinthuja; Morris, Christopher M.; Antony, Paul; Timmermann, Bernd; Sauer, Sascha; Pereira, Sandro L.; Schwamborn, Jens C.; May, Patrick; Gruenewald, Anne; Spielmann, Malte	Single-cell sequencing of human midbrain reveals glial activation and a Parkinson-specific neuronal state	BRAIN	Parkinson's disease; midbrain substantia nigra; single-cell sequencing; microglia; neuroinflammation	ALPHA-SYNUCLEIN; RISK LOCI; DISEASE; MICROGLIA; IDENTIFICATION; EXPRESSION; LINEAGE; LRRK2; BRAIN; NEURODEGENERATION	University of Luxembourg; Max Planck Society; University of Kiel; Newcastle University - UK; Helmholtz Association; Max Delbruck Center for Molecular Medicine; University of Lubeck; University of Lubeck	164	Brain	APR 29	2022	10.1093/brain/awab446	Clinical Neurology; Neurosciences	Neurosciences & Neurology
scRNA-seq	Alzheimer’s disease	human	postmortem brain	syn38120890	Blanchard, JW; Akay, LA; Davila-Velderrain, J; von Maydell, D; Mathys, H; Davidson, SM; Effenberger, A; Chen, CY; Maner-Smith, K; Hajjar, I; Ortlund, EA; Bula, M; Agbas, E; Ng, A; Jiang, XQ; Kahn, M; Blanco-Duque, C; Lavoie, N; Liu, LW; Reyes, R; Lin, YT; Ko, T; R'Bibo, L; Ralvenius, WT; Bennett, DA; Cam, HP; Kellis, M; Tsai, LH	Blanchard, Joel W.; Akay, Leyla Anne; Davila-Velderrain, Jose; von Maydell, Djuna; Mathys, Hansruedi; Davidson, Shawn M.; Effenberger, Audrey; Chen, Chih-Yu; Maner-Smith, Kristal; Hajjar, Ihab; Ortlund, Eric A.; Bula, Michael; Agbas, Emre; Ng, Ayesha; Jiang, Xueqiao; Kahn, Martin; Blanco-Duque, Cristina; Lavoie, Nicolas; Liu, Liwang; Reyes, Ricardo; Lin, Yuan-Ta; Ko, Tak; R'Bibo, Lea; Ralvenius, …	APOE4 impairs myelination via cholesterol dysregulation in oligodendrocytes	NATURE		APOLIPOPROTEIN-E; ALZHEIMERS-DISEASE; TYPE-4 ALLELE; RISK; STRESS; CELLS; MODEL; GENE	Massachusetts Institute of Technology (MIT); Massachusetts Institute of Technology (MIT); Massachusetts Institute of Technology (MIT); Princeton University; Emory University; Emory University; Emory University; Icahn School of Medicine at Mount Sinai; Rush University; Harvard University; Massachusetts Institute of Technology (MIT); Broad Institute; Human Technopole; Pennsylvania Commonwealth Syst…	146	Nature	NOV 24	2022	10.1038/s41586-022-05439-w	Multidisciplinary Sciences	Science & Technology - Other Topics
scRNA-seq	Alzheimer’s disease, Parkinson’s disease	human	cortex, substantia nigra	GSE140231	Agarwal, D; Sandor, C; Volpato, V; Caffrey, TM; Monzón-Sandoval, J; Bowden, R; Alegre-Abarrategui, J; Wade-Martins, R; Webber, C	Agarwal, Devika; Sandor, Cynthia; Volpato, Viola; Caffrey, Tara M.; Monzon-Sandoval, Jimena; Bowden, Rory; Alegre-Abarrategui, Javier; Wade-Martins, Richard; Webber, Caleb	A single-cell atlas of the human substantia nigra reveals cell-specific pathways associated with neurological disorders	NATURE COMMUNICATIONS		PARKINSONS-DISEASE; AMYLOID ANGIOPATHY; DIVERSITY; RISK	University of Oxford; University of Oxford; Cardiff University; University of Oxford; Wellcome Centre for Human Genetics; University of Oxford; University of British Columbia; Imperial College London	145	Nat. Commun.	AUG 21	2020	10.1038/s41467-020-17876-0	Multidisciplinary Sciences	Science & Technology - Other Topics
scRNA-seq	Parkinson’s disease	mice	Ventral midbrain	GSE116138	Tiklová, K; Björklund, ÅK; Lahti, L; Fiorenzano, A; Nolbrant, S; Gillberg, L; Volakakis, N; Yokota, C; Hilscher, MM; Hauling, T; Holmström, F; Joodmardi, E; Nilsson, M; Parmar, M; Perlmann, T	Tiklova, Katarina; Bjorklund, Asa K.; Lahti, Laura; Fiorenzano, Alessandro; Nolbrant, Sara; Gillberg, Linda; Volakakis, Nikolaos; Yokota, Chika; Hilscher, Markus M.; Hauling, Thomas; Holmstrom, Fredrik; Joodmardi, Eliza; Nilsson, Mats; Parmar, Malin; Perlmann, Thomas	Single-cell RNA sequencing reveals midbrain dopamine neuron diversity emerging during mouse brain development	NATURE COMMUNICATIONS		VENTRAL TEGMENTAL AREA; SUBSTANTIA-NIGRA; EXPRESSION; SEQ; DISEASE	Ludwig Institute for Cancer Research; Uppsala University; Lund University; Lund University; Stockholm University; Karolinska Institutet	143	Nat. Commun.	FEB 4	2019	10.1038/s41467-019-08453-1	Multidisciplinary Sciences	Science & Technology - Other Topics
scRNA-seq	multiple sclerosis	mice	forebrain	https://github.com/indrops/indrops	Clark, IC; Gutiérrez-Vázquez, C; Wheeler, MA; Li, ZR; Rothhammer, V; Linnerbauer, M; Sanmarco, LM; Guo, L; Blain, M; Zandee, SEJ; Chao, CC; Batterman, K; Schwabenland, M; Lotfy, P; Tejeda-Velarde, A; Hewson, P; Polonio, CM; Shultis, MW; Salem, Y; Tjon, EC; Fonseca-Castro, PH; Borucki, DM; de Lima, KA; Plasencia, A; Abate, AR; Rosene, DL; Hodgetts, KJ; Prinz, M; Antel, JP; Prat, A; Quintana, FJ	Clark, Iain C.; Gutierrez-Vazquez, Cristina; Wheeler, Michael A.; Li, Zhaorong; Rothhammer, Veit; Linnerbauer, Mathias; Sanmarco, Liliana M.; Guo, Lydia; Blain, Manon; Zandee, Stephanie E. J.; Chao, Chun-Cheih; Batterman, Katelyn, V; Schwabenland, Marius; Lotfy, Peter; Tejeda-Velarde, Amalia; Hewson, Patrick; Polonio, Carolina Manganeli; Shultis, Michael W.; Salem, Yasmin; Tjon, Emily C.; Fonseca…	Barcoded viral tracing of single-cell interactions in central nervous system inflammation	SCIENCE		DENDRITIC SPINE MORPHOLOGY; SET ENRICHMENT ANALYSIS; GENOME-WIDE EXPRESSION; GENE-EXPRESSION; ASTROCYTE ACTIVATION; MULTIPLE-SCLEROSIS; IN-VIVO; T-CELLS; SEMAPHORIN; RECEPTORS	Harvard University; Brigham & Women's Hospital; Harvard Medical School; University of California System; University of California Berkeley; Harvard University; Massachusetts Institute of Technology (MIT); Broad Institute; University of Erlangen Nuremberg; McGill University; Universite de Montreal; Boston University; University of Freiburg; University of California System; University of California…	137	Science	APR 23	2021	10.1126/science.abf1230	Multidisciplinary Sciences	Science & Technology - Other Topics
scRNA-seq	multiple sclerosis	human	blood	EGAS00001003823, EGAS00001003215	Cano-Gamez, E; Soskic, B; Roumeliotis, TI; So, E; Smyth, DJ; Baldrighi, M; Willé, D; Nakic, N; Esparza-Gordillo, J; Larminie, CGC; Bronson, PG; Tough, DF; Rowan, WC; Choudhary, JS; Trynka, G	Cano-Gamez, Eddie; Soskic, Blagoje; Roumeliotis, Theodoros, I; So, Ernest; Smyth, Deborah J.; Baldrighi, Marta; Wille, David; Nakic, Nikolina; Esparza-Gordillo, Jorge; Larminie, Christopher G. C.; Bronson, Paola G.; Tough, David F.; Rowan, Wendy C.; Choudhary, Jyoti S.; Trynka, Gosia	Single-cell transcriptomics identifies an effectorness gradient shaping the response of CD4+ T cells to cytokines	NATURE COMMUNICATIONS		MULTIPLE-SCLEROSIS; ENHANCER LANDSCAPE; GENE-EXPRESSION; DOUBLE-BLIND; LINEAGE; MEMORY; DIFFERENTIATION; DISTINCT; GENERATION; INDUCTION	Wellcome Trust Sanger Institute; Royal Marsden NHS Foundation Trust; University of London; Institute of Cancer Research - UK; GlaxoSmithKline; GlaxoSmithKline; GlaxoSmithKline; Biogen; GlaxoSmithKline; GlaxoSmithKline	127	Nat. Commun.	APR 14	2020	10.1038/s41467-020-15543-y	Multidisciplinary Sciences	Science & Technology - Other Topics
scRNA-seq	Alzheimer’s disease	mice	hippocampi, cortices	GSE153895	Lee, SH; Meilandt, WJ; Xie, L; Gandham, VD; Ngu, H; Barck, KH; Rezzonico, MG; Imperio, J; Lalehzadeh, G; Huntley, MA; Stark, KL; Foreman, O; Carano, RAD; Friedman, BA; Sheng, M; Easton, A; Bohlen, CJ; Hansen, DV	Lee, Seung-Hye; Meilandt, William J.; Xie, Luke; Gandham, Vineela D.; Ngu, Hai; Barck, Kai H.; Rezzonico, Mitchell G.; Imperio, Jose; Lalehzadeh, Guita; Huntley, Melanie A.; Stark, Kimberly L.; Foreman, Oded; Carano, Richard A. D.; Friedman, Brad A.; Sheng, Morgan; Easton, Amy; Bohlen, Christopher J.; Hansen, David V.	Trem2 restrains the enhancement of tau accumulation and neurodegeneration by β-amyloid pathology	NEURON		ALZHEIMERS-DISEASE; TRANSGENIC MICE; SYNAPSE LOSS; MOUSE MODEL; MICROGLIAL RESPONSE; MUTANT-TAU; DEGENERATION; DEFICIENCY; EXPRESSION; BRAIN	Roche Holding; Genentech; Roche Holding; Genentech; Roche Holding; Genentech; Roche Holding; Genentech; Harvard University; Massachusetts Institute of Technology (MIT); Broad Institute; Brigham Young University	117	Neuron	APR 21	2021	10.1016/j.neuron.2021.02.010	Neurosciences	Neurosciences & Neurology
scRNA-seq	Alzheimer’s disease	mice	hippocampi, cortices	GSE198014, GSE198013	Wang, C; Fan, L; Khawaja, RR; Liu, BY; Zhan, LH; Kodama, L; Chin, M; Li, YQ; Le, D; Zhou, YG; Condello, C; Grinberg, LT; Seeley, WW; Miller, BL; Mok, SA; Gestwicki, JE; Cuervo, AM; Luo, WJ; Gan, L	Wang, Chao; Fan, Li; Khawaja, Rabia R.; Liu, Bangyan; Zhan, Lihong; Kodama, Lay; Chin, Marcus; Li, Yaqiao; Le, David; Zhou, Yungui; Condello, Carlo; Grinberg, Lea T.; Seeley, William W.; Miller, Bruce L.; Mok, Sue-Ann; Gestwicki, Jason E.; Cuervo, Ana Maria; Luo, Wenjie; Gan, Li	Microglial NF-κB drives tau spreading and toxicity in a mouse model of tauopathy	NATURE COMMUNICATIONS		NEUROFIBRILLARY TANGLES; GENE-EXPRESSION; ALZHEIMERS-DISEASE; IKK-BETA; NEURONS; NEURODEGENERATION; INHIBITION; NEUROINFLAMMATION; INFLAMMATION; TRANSMISSION	University of California System; University of California San Francisco; The J David Gladstone Institutes; Cornell University; Weill Cornell Medicine; Montefiore Medical Center; Albert Einstein College of Medicine; Yeshiva University; University of California System; University of California San Francisco; University of California System; University of California San Francisco; University of Cali…	113	Nat. Commun.	APR 12	2022	10.1038/s41467-022-29552-6	Multidisciplinary Sciences	Science & Technology - Other Topics
scRNA-seq	Alzheimer’s disease	mouse	hippocampi, cortices	GSE130008	Rosenzweig, N; Dvir-Szternfeld, R; Tsitsou-Kampeli, A; Keren-Shaul, H; Ben-Yehuda, H; Weill-Raynal, P; Cahalon, L; Kertser, A; Baruch, K; Amit, I; Weiner, A; Schwartz, M	Rosenzweig, Neta; Dvir-Szternfeld, Raz; Tsitsou-Kampeli, Afroditi; Keren-Shaul, Hadas; Ben-Yehuda, Hila; Weill-Raynal, Pierre; Cahalon, Liora; Kertser, Alex; Baruch, Kuti; Amit, Ido; Weiner, Assaf; Schwartz, Michal	PD-1/PD-L1 checkpoint blockade harnesses monocyte-derived macrophages to combat cognitive impairment in a tauopathy mouse model	NATURE COMMUNICATIONS		EXACERBATES TAU PATHOLOGY; CENTRAL-NERVOUS-SYSTEM; REGULATORY T-CELLS; ALZHEIMERS-DISEASE; CHOROID-PLEXUS; LEUKOCYTE INFILTRATION; GLATIRAMER ACETATE; SYNAPSE LOSS; BRAIN; MICROGLIA	Weizmann Institute of Science; Weizmann Institute of Science	113	Nat. Commun.	JAN 28	2019	10.1038/s41467-019-08352-5	Multidisciplinary Sciences	Science & Technology - Other Topics
scRNA-seq	neuroinflammation	mice	hippocampus	GSE146395	Chen, MB; Yang, AC; Yousef, H; Lee, D; Chen, W; Schaum, N; Lehallier, B; Quake, SR; Wyss-Coray, T	Chen, Michelle B.; Yang, Andrew C.; Yousef, Hanadie; Lee, Davis; Chen, Winnie; Schaum, Nicholas; Lehallier, Benoit; Quake, Stephen R.; Wyss-Coray, Tony	Brain Endothelial Cells Are Exquisite Sensors of Age-Related Circulatory Cues	CELL REPORTS		OXIDATIVE STRESS; HIPPOCAMPAL NEUROGENESIS; SUPEROXIDE-DISMUTASE; ALZHEIMERS-DISEASE; COGNITIVE FUNCTION; BARRIER INTEGRITY; APOLIPOPROTEIN-E; BLOOD; DISRUPTION; MECHANISMS	Stanford University; Stanford University; Stanford University; Stanford University; US Department of Veterans Affairs; Veterans Health Administration (VHA); VA Palo Alto Health Care System; Stanford University	112	Cell Reports	MAR 31	2020	10.1016/j.celrep.2020.03.012	Cell Biology	Cell Biology
scRNA-seq	Alzheimer’s disease	mice	postmortem brain	GSE198531	Silvin, A; Uderhardt, S; Piot, C; Da Mesquita, S; Yang, KTRE; Geirsdottir, L; Mulder, K; Eyal, D; Liu, ZY; Bridlance, C; Thion, MS; Zhang, XM; Kong, WT; Deloger, M; Fontes, V; Weiner, A; Ee, R; Dress, R; Hang, JW; Balachander, A; Chakarov, S; Malleret, B; Dunsmore, G; Cexus, O; Chen, JM; Garel, S; Dutertre, CA; Amit, I; Kipnis, J; Ginhoux, F	Silvin, Aymeric; Uderhardt, Stefan; Piot, Cecile; Da Mesquita, Sandro; Yang, Katharine; Geirsdottir, Laufey; Mulder, Kevin; Eyal, David; Liu, Zhaoyuan; Bridlance, Cecile; Thion, Morgane Sonia; Zhang, Xiao Meng; Kong, Wan Ting; Deloger, Marc; Fontes, Vasco; Weiner, Assaf; Ee, Rachel; Dress, Regine; Hang, Jing Wen; Balachander, Akhila; Chakarov, Svetoslav; Malleret, Benoit; Dunsmore, Garett; Cexus,…	Dual ontogeny of disease-associated microglia and disease inflammatory macrophages in aging and neurodegeneration	IMMUNITY		ALZHEIMERS-DISEASE; RNA-SEQ; CELLS; FATE; REVEALS; MYELINOGENESIS; PATHOLOGY; IDENTITY; PACKAGE; ORIGIN	Agency for Science Technology & Research (A*STAR); A*STAR - Singapore Immunology Network (SIgN); Institut National de la Sante et de la Recherche Medicale (Inserm); UNICANCER; Gustave Roussy; Universite Paris Saclay; University of Erlangen Nuremberg; University of Erlangen Nuremberg; University of Erlangen Nuremberg; University of Erlangen Nuremberg; University of Virginia; Mayo Clinic; Weizmann …	111	Immunity	AUG 9	2022	10.1016/j.immuni.2022.07.004	Immunology	Immunology
scRNA-seq	multiple sclerosis	human	cerebral spinal fluid, brain blood	GSE133028	Ramesh, A; Schubert, RD; Greenfield, AL; Dandekar, R; Loudermilk, R; Sabatino, JJ; Koelzer, MT; Tran, EB; Koshal, K; Kim, K; Pröbstel, AK; Banerji, D; Guo, CY; Green, AJ; Bove, RM; DeRisi, JL; Gelfand, JM; Cree, BAC; Zamvil, SS; Baranzini, SE; Hauser, SL; Wilson, MR	Ramesh, Akshaya; Schubert, Ryan D.; Greenfield, Ariele L.; Dandekar, Ravi; Loudermilk, Rita; Sabatino, Joseph J., Jr.; Koelzer, Matthew T.; Tran, Edwina B.; Koshal, Kanishka; Kim, Kicheol; Probstel, Anne-Katrin; Banerji, Debarko; Guo, Chu-Yueh; Green, Ari J.; Bove, Riley M.; DeRisi, Joseph L.; Gelfand, Jeffrey M.; Cree, Bruce A. C.; Zamvil, Scott S.; Baranzini, Sergio E.; Hauser, Stephen L.; Wils…	A pathogenic and clonally expanded B cell transcriptome in active multiple sclerosis	PROCEEDINGS OF THE NATIONAL ACADEMY OF SCIENCES OF THE UNITED STATES OF AMERICA	multiple sclerosis; neuroimmunology; B cell; immune repertoire	EPSTEIN-BARR-VIRUS; T-CELLS; INTERFERON BETA-1A; BRAIN ATROPHY; ADD-ON; THERAPY; PLACEBO; ATORVASTATIN; OCRELIZUMAB; INFECTION	University of California System; University of California San Francisco; University of California System; University of California San Francisco; University of California System; University of California Los Angeles; University of California System; University of California San Francisco; University of California System; University of California San Francisco	107	Proc. Natl. Acad. Sci. U. S. A.	SEP 15	2020	10.1073/pnas.2008523117	Multidisciplinary Sciences	Science & Technology - Other Topics
scRNA-seq	neuroinflammation	mouse and human	postmortem brain	GSE129178, GSE139161	Xu, RJ; Li, XX; Boreland, AJ; Posyton, A; Kwan, K; Hart, RP; Jiang, P	Xu, Ranjie; Li, Xiaoxi; Boreland, Andrew J.; Posyton, Anthony; Kwan, Kelvin; Hart, Ronald P.; Jiang, Peng	Human iPSC-derived mature microglia retain their identity and functionally integrate in the chimeric mouse brain	NATURE COMMUNICATIONS		PLURIPOTENT STEM-CELLS; CENTRAL-NERVOUS-SYSTEM; TRANSCRIPTOMIC ANALYSIS; ALZHEIMERS-DISEASE; LAMINAR IDENTITY; PROGENITOR CELLS; MACROPHAGES; DIFFERENTIATION; ASTROCYTES; MODEL	Rutgers University System; Rutgers University New Brunswick; Nanjing Medical University; Rutgers University System; Rutgers University New Brunswick	103	Nat. Commun.	MAR 27	2020	10.1038/s41467-020-15411-9	Multidisciplinary Sciences	Science & Technology - Other Topics
scRNA-seq	neuroinflammation	mice	postmortem brain	undisclosed	Kiss, T; Nyúl-Tóth, A; Balasubramanian, P; Tarantini, S; Ahire, C; DelFavero, J; Yabluchanskiy, A; Csipo, L; Farkas, E; Wiley, G; Garman, L; Csiszar, A; Ungvari, Z	Kiss, Tamas; Nyul-Toth, Adam; Balasubramanian, Priya; Tarantini, Stefano; Ahire, Chetan; DelFavero, Jordan; Yabluchanskiy, Andriy; Csipo, Limas; Farkas, Eszter; Wiley, Graham; Garman, Lori; Csiszar, Anna; Ungvari, Zoltan	Single-cell RNA sequencing identifies senescent cerebromicrovascular endothelial cells in the aged mouse brain	GEROSCIENCE	Aging; Senescence; Geroscience; Blood-brain barrier; Vascular cognitive impairment	IMPAIRS ANGIOGENIC CAPACITY; INDUCED CEREBRAL MICROHEMORRHAGES; ALZHEIMERS-DISEASE; AUTOREGULATORY DYSFUNCTION; NEUROVASCULAR DYSFUNCTION; COGNITIVE IMPAIRMENT; SECRETORY PHENOTYPE; VASCULAR CLEARANCE; BARRIER BREAKDOWN; OXIDATIVE STRESS	University of Oklahoma System; University of Oklahoma Health Sciences Center; Szeged University; Hungarian Research Network; Hungarian Academy of Sciences; HUN-REN Biological Research Center; University of Oklahoma System; University of Oklahoma Health Sciences Center; Semmelweis University; University of Debrecen; Oklahoma Medical Research Foundation; University of Oklahoma System; University of…	101	GeroScience	APR	2020	10.1007/s11357-020-00177-1	Geriatrics & Gerontology	Geriatrics & Gerontology
scRNA-seq	Parkinson’s disease	mice	ventral mesencephalic and diencephalic region	GSE87069	Kee, N; Volakakis, N; Kirkeby, A; Dahl, L; Storvall, H; Nolbrant, S; Lahti, L; Björklund, ÅK; Gillberg, L; Joodmardi, E; Sandberg, R; Parmar, M; Perlmann, T	Kee, Nigel; Volakakis, Nikolaos; Kirkeby, Agnete; Dahl, Lina; Storvall, Helena; Nolbrant, Sara; Lahti, Laura; Bjorklund, Asa K.; Gillberg, Linda; Joodmardi, Eliza; Sandberg, Rickard; Parmar, Malin; Perlmann, Thomas	Single-Cell Analysis Reveals a Close Relationship between Differentiating Dopamine and Subthalamic Nucleus Neuronal Lineages	CELL STEM CELL		PLURIPOTENT STEM-CELLS; RNA-SEQ; PARKINSONS-DISEASE; EXPRESSION PATTERN; MIDBRAIN; BRAIN; MOUSE; LMX1B; PROGENITORS; FOREBRAIN	Ludwig Institute for Cancer Research; Karolinska Institutet; Lund University; Uppsala University	100	Cell Stem Cell	JAN 5	2017	10.1016/j.stem.2016.10.003	Cell & Tissue Engineering; Cell Biology	Cell Biology
scRNA-seq	Parkinson’s disease	human	human iPSCs from skin	undisclosed	Lang, C; Campbell, KR; Ryan, BJ; Carling, P; Attar, M; Vowles, J; Perestenko, OV; Bowden, R; Baig, F; Kasten, M; Hu, MT; Cowley, SA; Webber, C; Wade-Martins, R	Lang, Charmaine; Campbell, Kieran R.; Ryan, Brent J.; Carling, Phillippa; Attar, Moustafa; Vowles, Jane; Perestenko, Olga V.; Bowden, Rory; Baig, Fahd; Kasten, Meike; Hu, Michele T.; Cowley, Sally A.; Webber, Caleb; Wade-Martins, Richard	Single-Cell Sequencing of iPSC-Dopamine Neurons Reconstructs Disease Progression and Identifies HDAC4 as a Regulator of Parkinson Cell Phenotypes	CELL STEM CELL		GAUCHER-DISEASE; TASQUINIMOD; DEFICIENCY; EXPRESSION; SYMPTOMS; SURVIVAL; MUTATION; STRESS; MODELS; GROWTH	University of Oxford; University of Oxford; Wellcome Centre for Human Genetics; University of Oxford; University of Oxford; University of Lubeck; University of Lubeck; University of British Columbia; Cardiff University	99	Cell Stem Cell	JAN 3	2019	10.1016/j.stem.2018.10.023	Cell & Tissue Engineering; Cell Biology	Cell Biology
scRNA-seq;MARS-seq(Massively Parallel Single-Cell RNA-seq)	Alzheimer’s disease	mice	postmortem brain	GSE202297	Kenigsbuch, M; Bost, P; Halevi, S; Chang, YZ; Chen, S; Ma, Q; Hajbi, R; Schwikowski, B; Bodenmiller, B; Fu, HJ; Schwartz, M; Amit, I	Kenigsbuch, Mor; Bost, Pierre; Halevi, Shahar; Chang, Yuzhou; Chen, Shuo; Ma, Qin; Hajbi, Renana; Schwikowski, Benno; Bodenmiller, Bernd; Fu, Hongjun; Schwartz, Michal; Amit, Ido	A shared disease-associated oligodendrocyte signature among multiple CNS pathologies	NATURE NEUROSCIENCE		CELL RNA-SEQ; TRANSCRIPTION FACTOR; BETA; NEURODEGENERATION; MICROGLIA; PATTERNS; MICE	Weizmann Institute of Science; Weizmann Institute of Science; Centre National de la Recherche Scientifique (CNRS); Pasteur Network; Universite Paris Cite; Institut Pasteur Paris; Sorbonne Universite; University of Zurich; University System of Ohio; Ohio State University; University System of Ohio; Ohio State University; University System of Ohio; Ohio State University; Weizmann Institute of Scien…	87	Nat. Neurosci.	JUL	2022	10.1038/s41593-022-01104-7	Neurosciences	Neurosciences & Neurology
scRNA-seq	multiple sclerosis	mice	spinal cord	PRJNA648663	Dong, YF; D'Mello, C; Pinsky, W; Lozinski, BM; Kaushik, DK; Ghorbani, S; Moezzi, D; Brown, D; Melo, FC; Zandee, S; Vo, T; Prat, A; Whitehead, SN; Yong, VW	Dong, Yifei; D'Mello, Charlotte; Pinsky, William; Lozinski, Brian M.; Kaushik, Deepak K.; Ghorbani, Samira; Moezzi, Dorsa; Brown, Dennis; Melo, Francisca C.; Zandee, Stephanie; Vo, Tina; Prat, Alexandre; Whitehead, Shawn N.; Yong, V. Wee	Oxidized phosphatidylcholines found in multiple sclerosis lesions mediate neurodegeneration and are neutralized by microglia	NATURE NEUROSCIENCE		CHONDROITIN SULFATE PROTEOGLYCANS; LOW-DENSITY-LIPOPROTEIN; DEMYELINATED LESIONS; OXIDATIVE DAMAGE; PHOSPHOLIPIDS; CELLS; EXPRESSION; MICE; LDL; APOLIPOPROTEIN	University of Calgary; University of Calgary; Western University (University of Western Ontario); Universite de Montreal	84	Nat. Neurosci.	APR	2021	10.1038/s41593-021-00801-z	Neurosciences	Neurosciences & Neurology
scRNA-seq	Alzheimer’s disease	human	dorsolateral prefrontal cortex	https://www.synapse.org/#!Synapse:syn2580853/wiki/409853	Wingo, AP; Fan, W; Duong, DM; Gerasimov, ES; Dammer, EB; Liu, Y; Harerimana, NV; White, B; Thambisetty, M; Troncoso, JC; Kim, N; Schneider, JA; Hajjar, IM; Lah, JJ; Bennett, DA; Seyfried, NT; Levey, AI; Wingo, TS	Wingo, Aliza P.; Fan, Wen; Duong, Duc M.; Gerasimov, Ekaterina S.; Dammer, Eric B.; Liu, Yue; Harerimana, Nadia, V; White, Bartholomew; Thambisetty, Madhav; Troncoso, Juan C.; Kim, Namhee; Schneider, Julie A.; Hajjar, Ihab M.; Lah, James J.; Bennett, David A.; Seyfried, Nicholas T.; Levey, Allan, I; Wingo, Thomas S.	Shared proteomic effects of cerebral atherosclerosis and Alzheimer's disease on the human brain	NATURE NEUROSCIENCE		COGNITIVE DECLINE; TDP-43 PATHOLOGY; POSTMORTEM MRI; VESSEL DISEASE; DEMENTIA; NEUROPATHOLOGY; ASSOCIATION; EXPRESSION; DIAGNOSIS	US Department of Veterans Affairs; Veterans Health Administration (VHA); Atlanta VA Health Care System; Atlanta VA Medical Center; Emory University; Emory University; Emory University; Johns Hopkins University; Johns Hopkins Medicine; National Institutes of Health (NIH) - USA; NIH National Institute on Aging (NIA); Rush University; Emory University	83	Nat. Neurosci.	JUN	2020	10.1038/s41593-020-0635-5	Neurosciences	Neurosciences & Neurology
scRNA-seq	Alzheimer’s disease	mice	postmortem brain	GSE178304	Depp, C; Sun, T; Sasmita, AO; Spieth, L; Berghoff, SA; Nazarenko, T; Overhoff, K; Steixner-Kumar, AA; Subramanian, S; Arinrad, S; Ruhwedel, T; Möbius, W; Göbbels, S; Saher, G; Werner, HB; Damkou, A; Zampar, S; Wirths, O; Thalmann, M; Simons, M; Saito, T; Saido, T; Krueger-Burg, D; Kawaguchi, R; Willem, M; Haass, C; Geschwind, D; Ehrenreich, H; Stassart, R; Nave, KA	Depp, Constanze; Sun, Ting; Sasmita, Andrew Octavian; Spieth, Lena; Berghoff, Stefan A.; Nazarenko, Taisiia; Overhoff, Katharina; Steixner-Kumar, Agnes A.; Subramanian, Swati; Arinrad, Sahab; Ruhwedel, Torben; Moebius, Wiebke; Goebbels, Sandra; Saher, Gesine; Werner, Hauke B.; Damkou, Alkmini; Zampar, Silvia; Wirths, Oliver; Thalmann, Maik; Simons, Mikael; Saito, Takashi; Saido, Takaomi; Krueger-…	Myelin dysfunction drives amyloid-β deposition in models of Alzheimer's disease	NATURE		PRECURSOR PROTEIN; MOUSE MODEL; OLIGODENDROCYTE GENERATION; MICE LACKING; TRANSPORT; MICROGLIA; ACCUMULATION; TRANSCRIPTOMICS; HIPPOCAMPUS; DISRUPTION	Technical University of Munich; Helmholtz Association; German Center for Neurodegenerative Diseases (DZNE); University of Gottingen; University of Gottingen; University of Munich; Nagoya City University; RIKEN; University of California System; University of California Los Angeles; University of California Los Angeles Medical Center; David Geffen School of Medicine at UCLA; University of Munich; L…	83	Nature	JUN 8	2023	10.1038/s41586-023-06120-6	Multidisciplinary Sciences	Science & Technology - Other Topics
scRNA-seq	Alzheimer’s disease	mice	postmortem brain	GSE178304	De Schepper, S; Ge, JZ; Crowley, G; Ferreira, LSS; Garceau, D; Toomey, CE; Sokolova, D; Rueda-Carrasco, J; Shin, SH; Kim, JS; Childs, T; Lashley, T; Burden, JJ; Sasner, M; Frigerio, CS; Jung, S; Hong, S	De Schepper, Sebastiaan; Ge, Judy Z. Z.; Crowley, Gerard; Ferreira, Lais S. S.; Garceau, Dylan; Toomey, Christina E. E.; Sokolova, Dimitra; Rueda-Carrasco, Javier; Shin, Sun-Hye; Kim, Jung-Seok; Childs, Thomas; Lashley, Tammaryn; Burden, Jemima J. J.; Sasner, Michael; Frigerio, Carlo Sala; Jung, Steffen; Hong, Soyon	Perivascular cells induce microglial phagocytic states and synaptic engulfment via SPP1 in mouse models of Alzheimer's disease	NATURE NEUROSCIENCE		AMYLOID-BETA CLEARANCE; OSTEOPONTIN; BRAIN; MACROPHAGES; FATE; DEPOSITION; DISTINCT; MEMORY; MICE	University of London; University College London; Jackson Laboratory; University of London; University College London; University of London; University College London; Weizmann Institute of Science; University of London; University College London; University of London; University College London	77	Nat. Neurosci.	MAR	2023	10.1038/s41593-023-01257-z	Neurosciences	Neurosciences & Neurology
scRNA-seq	multiple sclerosis	human	cerebral spinal fluid	SRP180896, GSE127969	Beltrán, E; Gerdes, LA; Hansen, J; Flierl-Hecht, A; Krebs, S; Blum, H; Ertl-Wagner, B; Barkhof, F; Kümpfel, T; Hohlfeld, R; Dornmair, K	Beltran, Eduardo; Gerdes, Lisa Ann; Hansen, Julia; Flierl-Hecht, Andrea; Krebs, Stefan; Blum, Helmut; Ertl-Wagner, Birgit; Barkhof, Frederik; Kuempfel, Tania; Hohlfeld, Reinhard; Dornmair, Klaus	Early adaptive immune activation detected in monozygotic twins with prodromal multiple sclerosis	JOURNAL OF CLINICAL INVESTIGATION		MEMORY T-CELLS; CEREBROSPINAL-FLUID; CLONAL EXPANSIONS; CXCL16 EXPRESSION; TARGET ANTIGENS; B-CELLS; SYSTEM; TRAFFICKING; LYMPHOCYTES; RECRUITMENT	University of Munich; University of Munich; University of Munich; University of Toronto; Hospital for Sick Children (SickKids); Vrije Universiteit Amsterdam; VU UNIVERSITY MEDICAL CENTER; University of London; University College London; University of London; University College London; University of Munich	77	J. Clin. Invest.	NOV 1	2019	10.1172/JCI128475	Medicine, Research & Experimental	Research & Experimental Medicine
scRNA-seq	Alzheimer’s disease	human	postmortem brain	GSE164089	Chen, XW; Sun, GQ; Tian, E; Zhang, MZ; Davtyan, H; Beach, TG; Reiman, EM; Blurton-Jones, M; Holtzman, DM; Shi, YH	Chen, Xianwei; Sun, Guoqiang; Tian, E.; Zhang, Mingzi; Davtyan, Hayk; Beach, Thomas G.; Reiman, Eric M.; Blurton-Jones, Mathew; Holtzman, David M.; Shi, Yanhong	Modeling Sporadic Alzheimer's Disease in Human Brain Organoids under Serum Exposure	ADVANCED SCIENCE	brain organoids; disease modeling; induced pluripotent stem cells; serum exposure; sporadic Alzheimer's disease	PLURIPOTENT STEM-CELLS; CEREBRAL ORGANOIDS; BARRIER BREAKDOWN; APOLIPOPROTEIN-E; NEURONS; TAU; SUSCEPTIBILITY; INDIVIDUALS; ASTROCYTES; PROTEIN	City of Hope; Beckman Research Institute of City of Hope; University of California System; University of California Irvine; University of California System; University of California Irvine; Banner Research; Banner Health; Banner Sun Health Research Institute; Banner Research; Banner Health; Banner Alzheimer's Institute; University of California System; University of California Irvine; Washington …	74	Adv. Sci.	SEP	2021	10.1002/advs.202101462	Chemistry, Multidisciplinary; Nanoscience & Nanotechnology; Materials Science, Multidisciplinary	Chemistry; Science & Technology - Other Topics; Materials Science
scRNA-seq	neuroinflammation	human	cerebral spinal fluid	GSE117397	Farhadian, SF; Mehta, SS; Zografou, C; Robertson, K; Price, RW; Pappalardo, J; Chiarella, J; Hafler, DA; Spudich, SS	Farhadian, Shelli F.; Mehta, Sameet S.; Zografou, Chrysoula; Robertson, Kevin; Price, Richard W.; Pappalardo, Jenna; Chiarella, Jennifer; Hafler, David A.; Spudich, Serena S.	Single-cell RNA sequencing reveals microglia-like cells in cerebrospinal fluid during virologically suppressed HIV	JCI INSIGHT		NEUROCOGNITIVE IMPAIRMENT; ANTIRETROVIRAL THERAPY; ACTIVATION; DISORDERS; INFECTION; MECHANISMS; BRAIN	Yale University; Yale University; Yale University; Yale University; University of North Carolina; University of North Carolina Chapel Hill; University of California System; University of California San Francisco	73	JCI Insight	SEP 20	2018	10.1172/jci.insight.121718	Medicine, Research & Experimental	Research & Experimental Medicine
scRNA-seq	Alzheimer’s disease	mice	postmortem brain	GSE156183	Ellwanger, DC; Wang, ST; Brioschi, S; Shao, ZF; Green, L; Case, R; Yoo, D; Weishuhn, D; Rathanaswami, P; Bradley, J; Rao, S; Cha, DN; Luan, P; Sambashivan, S; Gilfillan, S; Hasson, SA; Foltz, IN; Campagne, MV; Colonna, M	Ellwanger, Daniel C.; Wang, Shoutang; Brioschi, Simone; Shao, Zhifei; Green, Lydia; Case, Ryan; Yoo, Daniel; Weishuhn, Dawn; Rathanaswami, Palaniswami; Bradley, Jodi; Rao, Sara; Cha, Diana; Luan, Peng; Sambashivan, Shilpa; Gilfillan, Susan; Hasson, Samuel A.; Foltz, Ian N.; Campagne, Menno van Lookeren; Colonna, Marco	Prior activation state shapes the microglia response to antihuman TREM2 in a mouse model of Alzheimer's disease	PROCEEDINGS OF THE NATIONAL ACADEMY OF SCIENCES OF THE UNITED STATES OF AMERICA	Alzheimer's disease; microglia; TREM2; amyloid beta; monoclonal antibody	AMYLOID HYPOTHESIS; MICE; PATHWAY; NEURODEGENERATION; MACROPHAGES; SURVIVAL	Amgen; Washington University (WUSTL); Amgen; Amgen; Amgen; Amgen; Amgen	72	Proc. Natl. Acad. Sci. U. S. A.	JAN 19	2021	10.1073/pnas.2017742118	Multidisciplinary Sciences	Science & Technology - Other Topics
scRNA-seq	Alzheimer’s disease	human	cerebral organoids	GSE147047	Pérez, MJ; Ivanyuk, D; Panagiotakopoulou, V; Di Napoli, G; Kalb, S; Brunetti, D; Al-Shaana, R; Kaeser, SA; Fraschka, SAK; Jucker, M; Zeviani, M; Viscomi, C; Deleidi, M	Perez, Maria Jose; Ivanyuk, Dina; Panagiotakopoulou, Vasiliki; Di Napoli, Gabriele; Kalb, Stefanie; Brunetti, Dario; Al-Shaana, Rawaa; Kaeser, Stephan A.; Fraschka, Sabine Anne-Kristin; Jucker, Mathias; Zeviani, Massimo; Viscomi, Carlo; Deleidi, Michela	Loss of function of the mitochondrial peptidase PITRM1 induces proteotoxic stress and Alzheimer's disease-like pathology in human cerebral organoids	MOLECULAR PSYCHIATRY		PERTURBATION; DEGRADATION; DYSFUNCTION; MITOPHAGY; AUTOPHAGY; PROTEIN; IMPORT	Eberhard Karls University of Tubingen; Eberhard Karls University Hospital; Helmholtz Association; German Center for Neurodegenerative Diseases (DZNE); Eberhard Karls University of Tubingen; Eberhard Karls University Hospital; Helmholtz Association; German Center for Neurodegenerative Diseases (DZNE); University of Milan; Eberhard Karls University of Tubingen; Eberhard Karls University Hospital; E…	72	Mol. Psychiatr.	OCT	2021	10.1038/s41380-020-0807-4	Biochemistry & Molecular Biology; Neurosciences; Psychiatry	Biochemistry & Molecular Biology; Neurosciences & Neurology; Psychiatry
scRNA-seq	Alzheimer’s disease	mice	telencephalon	GSM3334110, GSM3333461, GSM3333764, GSM3334111。全转录组深度测序数据集：GSE124162	Bhattarai, P; Cosacak, MI; Mashkaryan, V; Demir, S; Popova, SD; Govindarajan, N; Brandt, K; Zhang, YX; Chang, WP; Ampatzis, K; Kizil, C	Bhattarai, Prabesh; Cosacak, Mehmet Ilyas; Mashkaryan, Violeta; Demir, Sevgican; Popova, Stanislava Dimitrova; Govindarajan, Nambirajan; Brandt, Kerstin; Zhang, Yixin; Chang, Weipang; Ampatzis, Konstantinos; Kizil, Caghan	Neuron-glia interaction through Serotonin-BDNF-NGFR axis enables regenerative neurogenesis in Alzheimer's model of adult zebrafish brain	PLOS BIOLOGY		NEUROTROPHIC FACTOR BDNF; KAPPA-B ACTIVATION; HIPPOCAMPAL NEUROGENESIS; STEM-CELLS; TRANSPORTER FUNCTION; SUBVENTRICULAR ZONE; CELLULAR-PHASE; DENTATE GYRUS; EXPRESSION; DEPLETION	Technische Universitat Dresden; Technische Universitat Dresden; Karolinska Institutet	71	PLoS. Biol.	JAN	2020	10.1371/journal.pbio.3000585	Biochemistry & Molecular Biology; Biology	Biochemistry & Molecular Biology; Life Sciences & Biomedicine - Other Topics
scRNA-seq	Alzheimer’s disease	mice	postmortem brain	undisclosed	Claes, C; Danhash, EP; Hasselmann, J; Chadarevian, JP; Shabestari, SK; England, WE; Lim, TE; Hidalgo, JLS; Spitale, RC; Davtyan, H; Blurton-Jones, M	Claes, Christel; Danhash, Emma Pascal; Hasselmann, Jonathan; Chadarevian, Jean Paul; Shabestari, Sepideh Kiani; England, Whitney E.; Lim, Tau En; Hidalgo, Jorge Luis Silva; Spitale, Robert C.; Davtyan, Hayk; Blurton-Jones, Mathew	Plaque-associated human microglia accumulate lipid droplets in a chimeric model of Alzheimer's disease	MOLECULAR NEURODEGENERATION	TREM2; Human microglia; Chimeric Alzheimer mice; Lipid droplets	TREM2 DEFICIENCY; RESPONSES; MACROPHAGES; VARIANTS; GENETICS; BETA; MICE	University of California System; University of California Irvine; University of California System; University of California Irvine; University of California System; University of California Irvine; University of California System; University of California Irvine	70	Mol. Neurodegener.	JUL 23	2021	10.1186/s13024-021-00473-0	Neurosciences	Neurosciences & Neurology
scRNA-seq	Amyotrophic lateral sclerosis, frontotemporal dementia	human	cerebral organoids	GSE180122	Szebényi, K; Wenger, LMD; Sun, Y; Dunn, AWE; Limegrover, CA; Gibbons, GM; Conci, E; Paulsen, O; Mierau, SB; Balmus, G; Lakatos, A	Szebenyi, Kornelia; Wenger, Lea M. D.; Sun, Yu; Dunn, Alexander W. E.; Limegrover, Colleen A.; Gibbons, George M.; Conci, Elena; Paulsen, Ole; Mierau, Susanna B.; Balmus, Gabriel; Lakatos, Andras	Human ALS/FTD brain organoid slice cultures display distinct early astrocyte and targetable neuronal pathology	NATURE NEUROSCIENCE		AMYOTROPHIC-LATERAL-SCLEROSIS; HEXANUCLEOTIDE REPEAT; DNA-DAMAGE; CELL; EXPANSION; ALS; PROTEINS; DYNAMICS; MODELS; ATM	University of Cambridge; University of Cambridge; University of Cambridge; University of Cambridge	69	Nat. Neurosci.	NOV	2021	10.1038/s41593-021-00923-4	Neurosciences	Neurosciences & Neurology
scRNA-seq	Parkinson’s disease	human	human iPSCs	E-MTAB-9154	Fernandes, HJR; Patikas, N; Foskolou, S; Field, SF; Park, JE; Byrne, ML; Bassett, AR; Metzakopian, E	Fernandes, Hugo J. R.; Patikas, Nikolaos; Foskolou, Stefanie; Field, Sarah F.; Park, Jong-Eun; Byrne, Meg L.; Bassett, Andrew R.; Metzakopian, Emmanouil	Single-Cell Transcriptomics of Parkinson's Disease Human In Vitro Models Reveals Dopamine Neuron-Specific Stress Responses	CELL REPORTS		ALPHA-SYNUCLEIN; CHOLESTEROL-METABOLISM; MOLECULAR DIVERSITY; NEUROTROPHIC FACTOR; OXIDATIVE STRESS; SUBSTANTIA-NIGRA; BRAIN; ID2; ASSOCIATION; EXPRESSION	University of Cambridge; Wellcome Trust Sanger Institute; Korea Advanced Institute of Science & Technology (KAIST)	68	Cell Reports	OCT 13	2020	10.1016/j.celrep.2020.108263	Cell Biology	Cell Biology
scRNA-seq	Alzheimer’s disease	human	peripheral blood	GSE181279	Xu, H; Jia, JP	Xu, Hui; Jia, Jianping	Single-Cell RNA Sequencing of Peripheral Blood Reveals Immune Cell Signatures in Alzheimer's Disease	FRONTIERS IN IMMUNOLOGY	Alzheimer's disease; B cell receptor; single-cell RNA sequencing; T cell receptor; adaptive immunity	CEREBROSPINAL-FLUID; A-BETA; ACTIVATION; VARIANTS; DEMENTIA; HEALTHY	Capital Medical University; Capital Medical University; Capital Medical University; Capital Medical University	67	Front. Immunol.	AUG 9	2021	10.3389/fimmu.2021.645666	Immunology	Immunology
scRNA-seq	Alzheimer’s disease	zebrafish	telencephalon	GSE118577	Cosacak, MI; Bhattarai, R; Reinhardt, S; Petzold, A; Dahl, A; Zhang, Y; Kizil, C	Cosacak, Mehmet Ilyas; Bhattarai, Rabesh; Reinhardt, Susanne; Petzold, Andreas; Dahl, Andreas; Zhang, Yixin; Kizil, Caghan	Single-Cell Transcriptomics Analyses of Neural Stem Cell Heterogeneity and Contextual Plasticity in a Zebrafish Brain Model of Amyloid Toxicity	CELL REPORTS		NEUROGENIC RADIAL GLIA; ADULT NEUROGENESIS; REGENERATIVE NEUROGENESIS; SUBVENTRICULAR ZONE; EPENDYMAL CELLS; STAB INJURY; EXPRESSION; REVEALS; IDENTIFICATION; PROLIFERATION	Technische Universitat Dresden; Helmholtz Association; German Center for Neurodegenerative Diseases (DZNE); Technische Universitat Dresden; Technische Universitat Dresden; Technische Universitat Dresden	66	Cell Reports	APR 23	2019	10.1016/j.celrep.2019.03.090	Cell Biology	Cell Biology
scRNA-seq	Parkinson’s disease	human	fecal	DRA009322, DRA009229	Nishiwaki, H; Hamaguchi, T; Ito, M; Ishida, T; Maeda, T; Kashihara, K; Tsuboi, Y; Ueyama, J; Shimamura, T; Mori, H; Kurokawa, K; Katsuno, M; Hirayama, M; Ohnoa, K	Nishiwaki, Hiroshi; Hamaguchi, Tomonari; Ito, Mikako; Ishida, Tomohiro; Maeda, Tetsuya; Kashihara, Kenichi; Tsuboi, Yoshio; Ueyama, Jun; Shimamura, Teppei; Mori, Hiroshi; Kurokawa, Ken; Katsuno, Masahisa; Hirayama, Masaaki; Ohnoa, Kinji	Short-Chain Fatty Acid-Producing Gut Microbiota Is Decreased in Parkinson's Disease but Not in Rapid-Eye-Movement Sleep Behavior Disorder	MSYSTEMS	rapid-eye-movement behavior disorder; gut microbiota; meta-analysis; Parkinson's disease; topic model	ALPHA-SYNUCLEIN PATHOLOGY; OBLIGATORY TRIGGER SITE; DORSAL MOTOR NUCLEUS; SUBSTANTIA-NIGRA; SODIUM-BUTYRATE; DIETARY FIBER; SYSTEM; NEUROINFLAMMATION; IMPAIRMENT; UBIQUITIN	Nagoya University; Nagoya University; Iwate Medical University; Fukuoka University; Nagoya University; Research Organization of Information & Systems (ROIS); National Institute of Genetics (NIG) - Japan; Nagoya University	64	mSystems	NOV-DEC	2020	10.1128/mSystems.00797-20	Microbiology	Microbiology
scRNA-seq	neuroinflammation	mice		undisclosed	Dias, MC; Coisne, C; Lazarevic, I; Baden, P; Hata, M; Iwamoto, N; Francisco, DMF; Vanlandewijck, M; He, LQ; Baier, FA; Stroka, D; Bruggmann, R; Lyck, R; Enzmann, G; Deutsch, U; Betsholtz, C; Furuse, M; Tsukita, S; Engelhardt, B	Dias, Mariana Castro; Coisne, Caroline; Lazarevic, Ivana; Baden, Pascale; Hata, Masaki; Iwamoto, Noriko; Francisco, David Miguel Ferreira; Vanlandewijck, Michael; He, Liqun; Baier, Felix A.; Stroka, Deborah; Bruggmann, Remy; Lyck, Ruth; Enzmann, Gaby; Deutsch, Urban; Betsholtz, Christer; Furuse, Mikio; Tsukita, Shoichiro; Engelhardt, Britta	Claudin-3-deficient C57BL/6J mice display intact brain barriers	SCIENTIFIC REPORTS		EXPERIMENTAL AUTOIMMUNE ENCEPHALOMYELITIS; CEREBROSPINAL FLUID BARRIER; CENTRAL-NERVOUS-SYSTEM; TIGHT JUNCTION; CHOROID-PLEXUS; MULTIPLE-SCLEROSIS; ENDOTHELIAL-CELLS; WHITE-MATTER; P-SELECTIN; T-CELLS	University of Bern; Hyogo Medical University; Kobe University; University of Bern; University of Bern; Swiss Institute of Bioinformatics; AstraZeneca; Karolinska Institutet; University of Bern; Uppsala University; National Institutes of Natural Sciences (NINS) - Japan; National Institute for Physiological Sciences (NIPS)	65	Sci Rep	JAN 18	2019	10.1038/s41598-018-36731-3	Multidisciplinary Sciences	Science & Technology - Other Topics
scRNA-seq	neuroinflammation	mice and human	lung	GSE128033	Zhang, YZ; Jiang, M; Nouraie, M; Roth, MG; Tabib, T; Winters, S; Chen, XP; Sembrat, J; Chu, YX; Cardenes, N; Tuder, RM; Herzog, EL; Ryu, C; Rojas, M; Lafyatis, R; Gibson, KF; McDyer, JF; Kass, DJ; Alder, JK	Zhang, Yingze; Jiang, Mao; Nouraie, Mehdi; Roth, Mark G.; Tabib, Tracy; Winters, Spencer; Chen, Xiaoping; Sembrat, John; Chu, Yanxia; Cardenes, Nayra; Tuder, Rubin M.; Herzog, Erica L.; Ryu, Changwan; Rojas, Mauricio; Lafyatis, Robert; Gibson, Kevin F.; McDyer, John F.; Kass, Daniel J.; Alder, Jonathan K.	GDF15 is an epithelial-derived biomarker of idiopathic pulmonary fibrosis	AMERICAN JOURNAL OF PHYSIOLOGY-LUNG CELLULAR AND MOLECULAR PHYSIOLOGY	aging; MIC-1; NAG-1; SASP	DIFFERENTIATION FACTOR 15; SYSTEMIC-SCLEROSIS; INTEGRIN ACTIVATION; WEIGHT-LOSS; GROWTH; RECEPTOR; GDF-15; SENESCENCE; MUTATIONS; INFLAMMATION	Pennsylvania Commonwealth System of Higher Education (PCSHE); University of Pittsburgh; Pennsylvania Commonwealth System of Higher Education (PCSHE); University of Pittsburgh; Pennsylvania Commonwealth System of Higher Education (PCSHE); University of Pittsburgh; Pennsylvania Commonwealth System of Higher Education (PCSHE); University of Pittsburgh; University of Colorado System; University of Co…	63	Am. J. Physiol.-Lung Cell. Mol. Physiol.	OCT	2019	10.1152/ajplung.00062.2019	Physiology; Respiratory System	Physiology; Respiratory System
scRNA-seq	multiple sclerosis	human	cerebral spinal fluid	syn21904732	Esaulova, E; Cantoni, C; Shchukina, I; Zaitsev, K; Bucelli, RC; Wu, GF; Artyomov, MN; Cross, AH; Edelson, BT	Esaulova, Ekaterina; Cantoni, Claudia; Shchukina, Irina; Zaitsev, Konstantin; Bucelli, Robert C.; Wu, Gregory F.; Artyomov, Maxim N.; Cross, Anne H.; Edelson, Brian T.	Single-cell RNA-seq analysis of human CSF microglia and myeloid cells in neuroinflammation	NEUROLOGY-NEUROIMMUNOLOGY & NEUROINFLAMMATION		CENTRAL-NERVOUS-SYSTEM; MULTIPLE-SCLEROSIS; ANALYSIS REVEALS; ANTIBODIES; SUBSETS; ADULTS; HEALTH	Washington University (WUSTL); Washington University (WUSTL); ITMO University	62	Neurol.-Neuroimmunol. Neuroinflammation	JUL	2020	10.1212/NXI.0000000000000732	Clinical Neurology; Neurosciences	Neurosciences & Neurology
scRNA-seq	Alzheimer’s disease	mouse	brain	GSE200276, GSE209912	van Lengerich, B; Zhan, LH; Xia, D; Chan, D; Joy, D; Park, JI; Tatarakis, D; Calvert, M; Hummel, S; Lianoglou, S; Pizzo, ME; Prorok, R; Thomsen, E; Bartos, LM; Beumers, P; Capell, A; Davis, SS; de Weerd, L; Dugas, JC; Duque, J; Earr, T; Gadkar, K; Giese, T; Gill, A; Gnörich, J; Ha, C; Kannuswamy, M; Kim, DJ; Kunte, ST; Kunze, LH; Lac, D; Lechtenberg, K; Leung, AWS; Liang, CC; Lopez, I; McQuade, P…	van Lengerich, Bettina; Zhan, Lihong; Xia, Dan; Chan, Darren; Joy, David; Park, Joshua I.; Tatarakis, David; Calvert, Meredith; Hummel, Selina; Lianoglou, Steve; Pizzo, Michelle E.; Prorok, Rachel; Thomsen, Elliot; Bartos, Laura M.; Beumers, Philipp; Capell, Anja; Davis, Sonnet S.; de Weerd, Lis; Dugas, Jason C.; Duque, Joseph; Earr, Timothy; Gadkar, Kapil; Giese, Tina; Gill, Audrey; Gnoerich, Jo…	A TREM2-activating antibody with a blood-brain barrier transport vehicle enhances microglial metabolism in Alzheimer's disease models	NATURE NEUROSCIENCE		TREM2 VARIANTS; RISK LOCI; CELL; ACTIVATION; BETA; NEURODEGENERATION; ECTODOMAIN; CLEARANCE; RESPONSES; IMMUNITY	Helmholtz Association; German Center for Neurodegenerative Diseases (DZNE); University of Munich; University of Munich; University of Munich; University of Munich	62	Nat. Neurosci.	MAR	2023	10.1038/s41593-022-01240-0	Neurosciences	Neurosciences & Neurology
scRNA-seq	neuroinflammation	mice	postmortem brain	GSE90975	Tay, TL; Sagar; Dautzenberg, J; Grün, D; Prinz, M	Tay, Tuan Leng; Sagar; Dautzenberg, Jana; Gruen, Dominic; Prinz, Marco	Unique microglia recovery population revealed by single-cell RNAseq following neurodegeneration	ACTA NEUROPATHOLOGICA COMMUNICATIONS	Microglia; Recovery; Neurodegeneration; Single-cell RNA analysis	ALZHEIMERS-DISEASE; MYELOID SUBSETS; MOUSE MODELS; PROLIFERATION; TURNOVER; DISTINCT; HETEROGENEITY; TRANSCRIPTOME; MACROPHAGES; ACTIVATION	University of Freiburg; University of Freiburg; University of Freiburg; Max Planck Society; University of Freiburg	62	Acta Neuropathol. Commun.	SEP 5	2018	10.1186/s40478-018-0584-3	Neurosciences	Neurosciences & Neurology
scRNA-seq	multiple sclerosis	mouse	cortex	GSE148676, GSE148677	Shen, K; Reichelt, M; Kyauk, RV; Ngu, H; Shen, YAA; Foreman, O; Modrusan, Z; Friedman, BA; Sheng, M; Yuen, TJ	Shen, Kimberle; Reichelt, Mike; Kyauk, Roxanne, V; Ngu, Hai; Shen, Yun-An A.; Foreman, Oded; Modrusan, Zora; Friedman, Brad A.; Sheng, Morgan; Yuen, Tracy J.	Multiple sclerosis risk gene Mertk is required for microglial activation and subsequent remyelination	CELL REPORTS		CUPRIZONE-INDUCED DEMYELINATION; EXPRESSION PROFILES; CNS REMYELINATION; MYELIN DEBRIS; RECEPTOR; IMMUNE; PHAGOCYTOSIS; HETEROGENEITY; REGENERATION; MECHANISMS	Roche Holding; Genentech; Roche Holding; Genentech; Roche Holding; Genentech; Roche Holding; Genentech; Harvard University; Massachusetts Institute of Technology (MIT); Broad Institute	61	Cell Reports	MAR 9	2021	10.1016/j.celrep.2021.108835	Cell Biology	Cell Biology
scRNA-seq	neuroinflammation	mice	dorsal raphe nucleus	GSE144980	Okaty, BW; Sturrockt, N; Lozoya, YE; Chang, Y; Senft, RA; Lyon, KA; Alekseyenko, OV; Dymecki, SM	Okaty, Benjamin W.; Sturrockt, Nikita; Lozoya, Yasmin Escobedo; Chang, YoonJeung; Senft, Rebecca A.; Lyon, Krissy A.; Alekseyenko, Olga, V; Dymecki, Susan M.	A single-cell transcriptomic and anatomic atlas of mouse dorsal raphe Pet1 neurons	ELIFE		GLUTAMATE TRANSPORTER TYPE-3; CENTRAL-NERVOUS-SYSTEM; ETS DOMAIN FACTOR; PHA-L ANALYSIS; SEROTONERGIC NEURONS; VESICULAR GLUTAMATE; ASCENDING PROJECTIONS; ALZHEIMERS-DISEASE; SEQUENCE HOMOLOGY; OPIOID RECEPTOR	Harvard University; Harvard Medical School	60	eLife	JUN 22	2020	10.7554/eLife.55523	Biology	Life Sciences & Biomedicine - Other Topics
scRNA-seq	Parkinson’s disease	mice and human	hESCs from striatum	GSE118412, GSE132758	Tiklová, K; Nolbrant, S; Fiorenzano, A; Björklund, ÅK; Sharma, Y; Heuer, A; Gillberg, L; Hoban, DB; Cardoso, T; Adler, AF; Birtele, M; Lundén-Miguel, H; Volakakis, N; Kirkeby, A; Perlmann, T; Parmar, M	Tiklova, Katarina; Nolbrant, Sara; Fiorenzano, Alessandro; Bjorklund, Asa K.; Sharma, Yogita; Heuer, Andreas; Gillberg, Linda; Hoban, Deirdre B.; Cardoso, Tiago; Adler, Andrew F.; Birtele, Marcella; Lunden-Miguel, Hilda; Volakakis, Nikolaos; Kirkeby, Agnete; Perlmann, Thomas; Parmar, Malin	Single cell transcriptomics identifies stem cell-derived graft composition in a model of Parkinson's disease	NATURE COMMUNICATIONS		DOPAMINE NEURONS; RNA-SEQ; HUMAN ES; DIFFERENTIATION; PROGENITORS; EXPRESSION; TRANSPLANTATION; GENERATION; REVEALS	Ludwig Institute for Cancer Research; Karolinska Institutet; Lund University; Lund University; Uppsala University; University of Copenhagen	60	Nat. Commun.	MAY 15	2020	10.1038/s41467-020-16225-5	Multidisciplinary Sciences	Science & Technology - Other Topics
scRNA-seq	Alzheimer’s disease	mice	postmortem brain	GSE158962	Fitz, NF; Nam, KN; Wolfe, CM; Letronne, F; Playso, BE; Iordanova, BE; Kozai, TDY; Biedrzycki, RJ; Kagan, VE; Tyurina, YY; Han, XL; Lefterov, I; Koldamova, R	Fitz, Nicholas F.; Nam, Kyong Nyon; Wolfe, Cody M.; Letronne, Florent; Playso, Brittany E.; Iordanova, Bistra E.; Kozai, Takashi D. Y.; Biedrzycki, Richard J.; Kagan, Valerian E.; Tyurina, Yulia Y.; Han, Xianlin; Lefterov, Iliya; Koldamova, Radosveta	Phospholipids of APOE lipoproteins activate microglia in an isoform-specific manner in preclinical models of Alzheimer's disease	NATURE COMMUNICATIONS		APOLIPOPROTEIN-E; AMYLOID-BETA; COGNITIVE DEFICITS; A-BETA; TREM2; ABCA1; ASSOCIATION; LIPIDOMICS; CLEARANCE; PHENOTYPE	Pennsylvania Commonwealth System of Higher Education (PCSHE); University of Pittsburgh; Pennsylvania Commonwealth System of Higher Education (PCSHE); University of Pittsburgh	59	Nat. Commun.	JUN 7	2021	10.1038/s41467-021-23762-0	Multidisciplinary Sciences	Science & Technology - Other Topics
scRNA-seq	Alzheimer’s disease and multiple sclerosis	mice	postmortem brain	GSE180041, GSE182846	Pandey, S; Shen, K; Lee, SH; Shen, YAA; Wang, YY; Otero-García, M; Kotova, N; Vito, ST; Laufer, BI; Newton, DF; Rezzonico, MG; Hanson, JE; Kaminker, JS; Bohlen, CJ; Yuen, TJ; Friedman, BA	Pandey, Shristi; Shen, Kimberle; Lee, Seung-Hye; Shen, Yun-An A.; Wang, Yuanyuan; Otero-Garcia, Marcos; Kotova, Natalya; Vito, Stephen T.; Laufer, Benjamin, I; Newton, Dwight F.; Rezzonico, Mitchell G.; Hanson, Jesse E.; Kaminker, Joshua S.; Bohlen, Christopher J.; Yuen, Tracy J.; Friedman, Brad A.	Disease-associated oligodendrocyte responses across neurodegenerative diseases	CELL REPORTS		MULTIPLE-SCLEROSIS; AMYLOID DEPOSITION; ALZHEIMERS-DISEASE; TRANSGENIC MICE; EXPRESSION; MICROGLIA; MYELINATION; ACTIVATION; CELLS; BETA	Agency for Science Technology & Research (A*STAR); A*STAR - Genome Institute of Singapore (GIS)	55	Cell Reports	AUG 23	2022	10.1016/j.celrep.2022.111189	Cell Biology	Cell Biology
scRNA-seq	neuroinflammation	human	cerebral spinal fluid	GEO200164	Piehl, N; van Olst, L; Ramakrishnan, A; Teregulova, V; Simonton, B; Zhang, ZY; Tapp, E; Channappa, D; Oh, H; Losada, PM; Rutledge, J; Trelle, AN; Mormino, EC; Elahi, F; Galasko, DR; Henderson, VW; Wagner, AD; Wyss-Coray, T; Gate, D	Piehl, Natalie; van Olst, Lynn; Ramakrishnan, Abhirami; Teregulova, Victoria; Simonton, Brooke; Zhang, Ziyang; Tapp, Emma; Channappa, Divya; Oh, Hamilton; Losada, Patricia M.; Rutledge, Jarod; Trelle, Alexandra N.; Mormino, Elizabeth C.; Elahi, Fanny; Galasko, Douglas R.; Henderson, Victor W.; Wagner, Anthony D.; Wyss-Coray, Tony; Gate, David	Cerebrospinal fluid immune dysregulation during healthy brain aging and cognitive impairment	CELL		APOLIPOPROTEIN-E; GENETIC ASSOCIATION; ALZHEIMERS-DISEASE; CHOROID-PLEXUS; T-CELLS; EXPRESSION; RISK; POLYMORPHISMS; TRAFFICKING; MUTATIONS	Northwestern University; Feinberg School of Medicine; Stanford University; Stanford University; Stanford University; Stanford University; Stanford University; Stanford University; Icahn School of Medicine at Mount Sinai; University of California System; University of California San Diego; Stanford University; Stanford University	52	Cell	DEC 22	2022	10.1016/j.cell.2022.11.019	Biochemistry & Molecular Biology; Cell Biology	Biochemistry & Molecular Biology; Cell Biology
scRNA-seq	neuroinflammation	mice	postmortem brain	GSE147693	Zhao, L; Li, ZQ; Vong, JSL; Chen, XY; Lai, HM; Yan, LYC; Huang, JZ; Sy, SKH; Tian, XY; Huang, Y; Chan, HYE; So, HC; Ng, WL; Tang, YM; Lin, WJ; Mok, VCT; Ko, H	Zhao, Lei; Li, Zhongqi; Vong, Joaquim S. L.; Chen, Xinyi; Lai, Hei-Ming; Yan, Leo Y. C.; Huang, Junzhe; Sy, Samuel K. H.; Tian, Xiaoyu; Huang, Yu; Chan, Ho Yin Edwin; So, Hon-Cheong; Ng, Wai-Lung; Tang, Yamei; Lin, Wei-Jye; Mok, Vincent C. T.; Ko, Ho	Pharmacologically reversible zonation-dependent endothelial cell transcriptomic changes with neurodegenerative disease associations in the aged brain	NATURE COMMUNICATIONS		ALZHEIMERS-DISEASE; PEPTIDE-1 RECEPTOR; BARRIER PERMEABILITY; DOPAMINERGIC-NEURONS; NEUROVASCULAR UNIT; BLOOD; PERICYTES; DYSFUNCTION; EXPRESSION; MODEL	Chinese University of Hong Kong; Chinese University of Hong Kong; Chinese University of Hong Kong; Chinese University of Hong Kong; Chinese University of Hong Kong; Chinese University of Hong Kong; Chinese University of Hong Kong; Chinese University of Hong Kong; Chinese University of Hong Kong; Chinese University of Hong Kong; Sun Yat Sen University; Sun Yat Sen University; Sun Yat Sen Universit…	53	Nat. Commun.	SEP 4	2020	10.1038/s41467-020-18249-3	Multidisciplinary Sciences	Science & Technology - Other Topics
scRNA-seq	neuroinflammation	mice and human	postmortem brain and cortical organoids	GSE175722	Cakir, B; Tanaka, Y; Kiral, FR; Xiang, YF; Dagliyan, O; Wang, J; Lee, M; Greaney, AM; Yang, WS; DuBoulay, C; Kural, MH; Patterson, B; Zhong, M; Kim, J; Bai, YL; Min, W; Niklason, LE; Patra, P; Park, IH	Cakir, Bilal; Tanaka, Yoshiaki; Kiral, Ferdi Ridvan; Xiang, Yangfei; Dagliyan, Onur; Wang, Juan; Lee, Maria; Greaney, Allison M.; Yang, Woo Sub; DuBoulay, Catherine; Kural, Mehmet Hamdi; Patterson, Benjamin; Zhong, Mei; Kim, Jonghun; Bai, Yalai; Min, Wang; Niklason, Laura E.; Patra, Prabir; Park, In-Hyun	Expression of the transcription factor PU.1 induces the generation of microglia-like cells in human cortical organoids	NATURE COMMUNICATIONS		HUMAN BRAIN-DEVELOPMENT; PLURIPOTENT STEM-CELLS; CEREBRAL ORGANOIDS; DIVERSITY; MODEL; INDIVIDUALS; PATHOLOGY; VARIANTS; EMERGE; CD33	Yale University; Harvard University; Harvard Medical School; Yale University; Yale University; Yale University; Colby College; Yale University; Yale University; Yale University; University of Bridgeport; Universite de Montreal	53	Nat. Commun.	JAN 20	2022	10.1038/s41467-022-28043-y	Multidisciplinary Sciences	Science & Technology - Other Topics
scRNA-seq	neuroinflammation	mice	white matter	GSE202579	Kaya, T; Mattugini, N; Liu, L; Ji, H; Cantuti-Castelvetri, L; Wu, JP; Schifferer, M; Groh, J; Martini, R; Besson-Girard, S; Kaji, S; Liesz, A; Gokce, O; Simons, M	Kaya, Tugberk; Mattugini, Nicola; Liu, Lu; Ji, Hao; Cantuti-Castelvetri, Ludovico; Wu, Jianping; Schifferer, Martina; Groh, Janos; Martini, Rudolf; Besson-Girard, Simon; Kaji, Seiji; Liesz, Arthur; Gokce, Ozgun; Simons, Mikael	CD8+ T cells induce interferon-responsive oligodendrocytes and microglia in white matter aging	NATURE NEUROSCIENCE		ALZHEIMERS-DISEASE; MYELIN; MICE; EXPRESSION; DEATH; GAMMA; LEADS	University of Munich; Technical University of Munich; Helmholtz Association; German Center for Neurodegenerative Diseases (DZNE); University of Munich; University of Munich; University of Wurzburg	49	Nat. Neurosci.	NOV	2022	10.1038/s41593-022-01183-6	Neurosciences	Neurosciences & Neurology
scRNA-seq	Parkinson’s disease	human	blood	https://zenodo.org/record/3993994.	Wang, PP; Yao, LF; Luo, M; Zhou, WY; Jin, XY; Xu, ZC; Yan, S; Li, YQ; Xu, C; Cheng, R; Huang, Y; Lin, XY; Ma, KX; Cao, HM; Liu, HX; Xue, GF; Han, F; Nie, H; Jiang, QH	Wang, Pingping; Yao, Lifen; Luo, Meng; Zhou, Wenyang; Jin, Xiyun; Xu, Zhaochun; Yan, Shi; Li, Yiqun; Xu, Chang; Cheng, Rui; Huang, Yan; Lin, Xiaoyu; Ma, Kexin; Cao, Huimin; Liu, Hongxin; Xue, Guangfu; Han, Fang; Nie, Huan; Jiang, Qinghua	Single-cell transcriptome and TCR profiling reveal activated and expanded T cell populations in Parkinson's disease	CELL DISCOVERY		ALPHA-SYNUCLEIN; BRAIN; DIFFERENTIATION; INFILTRATION; TECHNOLOGIES; LYMPHOCYTES; CHEMOKINE; EFFECTOR; SEQUENCE; DISTINCT	Harbin Institute of Technology; Harbin Medical University; Harbin Institute of Technology	49	Cell Discov.	JUL 20	2021	10.1038/s41421-021-00280-3	Cell Biology	Cell Biology
scRNA-seq	neuroinflammation	mice	spinal cord, brain	https://doi.org/10.5281/zenodo.5722108 https://doi.org/10.5281/zenodo.5722170 https://doi.org/10.5281/zenodo.5722172 https://doi.org/10.5281/zenodo.5711708	Amorim, A; De Feo, D; Friebel, E; Ingelfinger, F; Anderfuhren, CD; Krishnarajah, S; Andreadou, M; Welsh, CA; Liu, ZY; Ginhoux, F; Greter, M; Becher, B	Amorim, Ana; De Feo, Donatella; Friebel, Ekaterina; Ingelfinger, Florian; Anderfuhren, Cyrill Dimitri; Krishnarajah, Sinduya; Andreadou, Myrto; Welsh, Christina A.; Liu, Zhaoyuan; Ginhoux, Florent; Greter, Melanie; Becher, Burkhard	IFNγ and GM-CSF control complementary differentiation programs in the monocyte-to-phagocyte transition during neuroinflammation	NATURE IMMUNOLOGY		COLONY-STIMULATING FACTOR; HIGH-DIMENSIONAL CYTOMETRY; CENTRAL-NERVOUS-SYSTEM; LY6C(HI) MONOCYTES; EFFECTOR PHASE; MYELOID CELLS; MICE; MACROPHAGES; POPULATION; DEFICIENT	University of Zurich; Shanghai Jiao Tong University; Chinese Academy of Sciences; Agency for Science Technology & Research (A*STAR); A*STAR - Singapore Immunology Network (SIgN); Roche Holding	49	Nat. Immunol.	FEB	2022	10.1038/s41590-021-01117-7	Immunology	Immunology
scRNA-seq	Alzheimer’s disease	human	blood	undisclosed	Dumanski, JP; Halvardson, J; Davies, H; Rychlicka-Buniowska, E; Mattisson, J; Moghadam, BT; Nagy, N; Weglarczyk, K; Bukowska-Strakova, K; Danielsson, M; Olszewski, P; Piotrowski, A; Oerton, E; Ambicka, A; Przewoznik, M; Belch, L; Grodzicki, T; Chlosta, PL; Imreh, S; Giedraitis, V; Kilander, L; Nordlund, J; Ameur, A; Gyllensten, U; Johansson, Å; Józkowicz, A; Siedlar, M; Klich-Raczka, A; Jaszczyns…	Dumanski, Jan P.; Halvardson, Jonatan; Davies, Hanna; Rychlicka-Buniowska, Edyta; Mattisson, Jonas; Moghadam, Behrooz Torabi; Nagy, Noemi; Weglarczyk, Kazimierz; Bukowska-Strakova, Karolina; Danielsson, Marcus; Olszewski, Pawel; Piotrowski, Arkadiusz; Oerton, Erin; Ambicka, Aleksandra; Przewoznik, Marcin; Belch, Lukasz; Grodzicki, Tomasz; Chlosta, Piotr L.; Imreh, Stefan; Giedraitis, Vilmantas; K…	Immune cells lacking Y chromosome show dysregulation of autosomal gene expression	CELLULAR AND MOLECULAR LIFE SCIENCES	LOY; Mosaic loss of chromosome Y; Differential gene expression; LATE; LOY-associated transcriptional effects	NATURAL-KILLER-CELLS; MOSAIC LOSS; PERIPHERAL-BLOOD; NK CELLS; ACTIVATION; SURVIVAL; CROSS; AGE	Uppsala University; Uppsala University; Fahrenheit Universities; Medical University Gdansk; Fahrenheit Universities; Medical University Gdansk; Karolinska Institutet; Jagiellonian University; Collegium Medicum Jagiellonian University; University of Cambridge; Maria Sklodowska-Curie National Research Institute of Oncology; Jagiellonian University; Collegium Medicum Jagiellonian University; Jagiell…	49	Cell. Mol. Life Sci.	APR	2021	10.1007/s00018-021-03822-w	Biochemistry & Molecular Biology; Cell Biology	Biochemistry & Molecular Biology; Cell Biology
scRNA-seq	Parkinson’s disease	mice	postmortem brain	GSE186483	Russo, I; Kaganovich, A; Ding, J; Landeck, N; Mamais, A; Varanita, T; Biosa, A; Tessari, I; Bubacco, L; Greggio, E; Cookson, MR	Russo, Isabella; Kaganovich, Alice; Ding, Jinhui; Landeck, Natalie; Mamais, Adamantios; Varanita, Tatiana; Biosa, Alice; Tessari, Isabella; Bubacco, Luigi; Greggio, Elisa; Cookson, Mark R.	Transcriptome analysis of LRRK2 knock-out microglia cells reveals alterations of inflammatory- and oxidative stress-related pathways upon treatment with α-synuclein fibrils	NEUROBIOLOGY OF DISEASE	LRRK2; Microglia; alpha-Synuclein; Parkinson's disease; Neuroinflammation; Oxidative stress	ACTIVATES MICROGLIA; PARKINSONS-DISEASE; BRAIN; MUTATIONS; MODEL	University of Padua; University of Brescia; National Institutes of Health (NIH) - USA; NIH National Institute on Aging (NIA)	49	Neurobiol. Dis.	SEP	2019	10.1016/j.nbd.2019.05.012	Neurosciences	Neurosciences & Neurology
scRNA-seq	Alzheimer’s disease	human	postmortem brain	E-MTAB-10352, PRJNA898624, PRJNA898624	Herdy, JR; Traxler, L; Agarwal, RK; Karbacher, L; Schlachetzki, JCM; Boehnke, L; Zangwill, D; Galasko, D; Glass, CK; Mertens, J; Gage, FH	Herdy, Joseph R.; Traxler, Larissa; Agarwal, Ravi K.; Karbacher, Lukas; Schlachetzki, Johannes C. M.; Boehnke, Lena; Zangwill, Dina; Galasko, Doug; Glass, Christopher K.; Mertens, Jerome; Gage, Fred H.	Increased post-mitotic senescence in aged human neurons is a pathological feature of Alzheimer's disease	CELL STEM CELL		ONCOGENE-INDUCED SENESCENCE; REPROGRAMMED HUMAN NEURONS; CELLULAR SENESCENCE; REPLICATIVE SENESCENCE; CORTICAL-NEURONS; EXPRESSION; CELLS; INHIBITORS; PHENOTYPE; GROWTH	University of California System; University of California San Diego; Salk Institute; University of California System; University of California San Diego; University of California System; University of California San Diego	48	Cell Stem Cell	DEC 1	2022	10.1016/j.stem.2022.11.010	Cell & Tissue Engineering; Cell Biology	Cell Biology
scRNA-seq	neuroinflammation	human	cerebral organoids	GSE181422	Samudyata; Oliveira, AO; Malwade, S; de Sousa, NR; Goparaju, SK; Gracias, J; Orhan, F; Steponaviciute, L; Schalling, M; Sheridan, SD; Perlis, RH; Rothfuchs, AG; Sellgren, CM	Samudyata; Oliveira, Ana O.; Malwade, Susmita; de Sousa, Nuno Rufino; Goparaju, Sravan K.; Gracias, Jessica; Orhan, Funda; Steponaviciute, Laura; Schalling, Martin; Sheridan, Steven D.; Perlis, Roy H.; Rothfuchs, Antonio G.; Sellgren, Carl M.	SARS-CoV-2 promotes microglial synapse elimination in human brain organoids	MOLECULAR PSYCHIATRY		CHOROID-PLEXUS; CELLS; NEUROTROPISM; MODELS	Karolinska Institutet; Karolinska Institutet; Karolinska Institutet; Karolinska Institutet; Karolinska University Hospital; Harvard University; Massachusetts General Hospital; Harvard University; Massachusetts General Hospital; Karolinska Institutet; Stockholm County Council; Karolinska Institutet; Karolinska University Hospital	48	Mol. Psychiatr.	OCT	2022	10.1038/s41380-022-01786-2	Biochemistry & Molecular Biology; Neurosciences; Psychiatry	Biochemistry & Molecular Biology; Neurosciences & Neurology; Psychiatry
scRNA-seq	Alzheimer’s disease	mice and human	hippocampus, brain	GSE136389, GSE181903, GSE183068, GSE140670, GSE181678	Sayed, FA; Kodama, L; Fan, L; Carling, GK; Udeochu, JC; Le, D; Li, QY; Zhou, L; Wong, MY; Horowitz, R; Ye, P; Mathys, H; Wang, MH; Niu, X; Mazutis, L; Jiang, XQ; Wang, XT; Gao, FY; Brendel, M; Telpoukhovskaia, M; Tracy, TE; Frost, G; Zhou, YG; Li, YQ; Qiu, Y; Cheng, ZL; Yu, GQ; Hardy, J; Coppola, G; Wang, F; DeTure, MA; Zhang, B; Xie, L; Trajnowski, JQ; Lee, VMY; Gong, SC; Sinha, SC; Dickson, DW;…	Sayed, Faten A.; Kodama, Lay; Fan, Li; Carling, Gillian K.; Udeochu, Joe C.; Le, David; Li, Qingyun; Zhou, Lu; Wong, Man Ying; Horowitz, Rose; Ye, Pearly; Mathys, Hansruedi; Wang, Minghui; Niu, Xiang; Mazutis, Linas; Jiang, Xueqiao; Wang, Xueting; Gao, Fuying; Brendel, Matthew; Telpoukhovskaia, Maria; Tracy, Tara E.; Frost, Georgia; Zhou, Yungui; Li, Yaqiao; Qiu, Yue; Cheng, Zuolin; Yu, Guoqiang;…	AD-linked R47H-TREM2 mutation induces disease-enhancing microglial states via AKT hyperactivation	SCIENCE TRANSLATIONAL MEDICINE		ALZHEIMERS-DISEASE; TREM2 DEFICIENCY; MOUSE MODEL; RNA-SEQ; APOLIPOPROTEIN-E; CELLS; DATABASE; MICE; NEURODEGENERATION; INFLAMMATION	University of California System; University of California San Francisco; University of California System; University of California San Francisco; The J David Gladstone Institutes; Cornell University; Weill Cornell Medicine; University of California System; University of California San Francisco; University of California System; University of California San Francisco; Washington University (WUSTL)…	48	Sci. Transl. Med.	DEC 1	2021	10.1126/scitranslmed.abe3947	Cell Biology; Medicine, Research & Experimental	Cell Biology; Research & Experimental Medicine
scRNA-seq	Alzheimer’s disease	human	postmortem brain	GSE99305, GSE173433	Alghamdi, N; Chang, WN; Dang, PT; Lu, XY; Wan, CL; Gampala, S; Huang, Z; Wang, JS; Ma, Q; Zang, Y; Fishel, M; Cao, S; Zhang, C	Alghamdi, Norah; Chang, Wennan; Dang, Pengtao; Lu, Xiaoyu; Wan, Changlin; Gampala, Silpa; Huang, Zhi; Wang, Jiashi; Ma, Qin; Zang, Yong; Fishel, Melissa; Cao, Sha; Zhang, Chi	A graph neural network model to estimate cell-wise metabolic flux using single-cell RNA-seq data	GENOME RESEARCH		ALZHEIMERS-DISEASE; SLC TRANSPORTERS; DNA METHYLATION; GENE-EXPRESSION; CANCER; HETEROGENEITY; DYSREGULATION; CONTRIBUTES; MECHANISMS; PLASTICITY	Indiana University System; Indiana University Bloomington; Indiana University System; Indiana University Bloomington; Purdue University System; Purdue University; Indiana University System; Indiana University Bloomington; University System of Ohio; Ohio State University; Indiana University System; Indiana University Bloomington	48	Genome Res.	OCT	2021	10.1101/gr.271205.120	Biochemistry & Molecular Biology; Biotechnology & Applied Microbiology; Genetics & Heredity	Biochemistry & Molecular Biology; Biotechnology & Applied Microbiology; Genetics & Heredity
scRNA-seq	Alzheimer’s disease	mouse	postmortem brain	undisclosed	Bhattacherjee, A; Jung, JS; Zia, S; Ho, M; Eskandari-Sedighi, G; Laurent, CDS; McCord, KA; Bains, A; Sidhu, G; Sarkar, S; Plemel, JR; Macauley, MS	Bhattacherjee, Abhishek; Jung, Jaesoo; Zia, Sameera; Ho, Madelene; Eskandari-Sedighi, Ghazaleh; St. Laurent, Chris D.; McCord, Kelli A.; Bains, Arjun; Sidhu, Gaurav; Sarkar, Susmita; Plemel, Jason R.; Macauley, Matthew S.	The CD33 short isoform is a gain-of-function variant that enhances Aβ1-42 phagocytosis in microglia	MOLECULAR NEURODEGENERATION	Alzheimer’ s disease; CD33; Immunomodulatory; Isoform; Microglia; Phagocytosis; Mouse model; Gain-of-function	ALZHEIMERS-DISEASE; COMMON VARIANTS; GENE-EXPRESSION; A-BETA; ACTIVATION; EPHA1; IMMUNITY; CELLS; CD2AP; LOCI	University of Alberta; University of Alberta; University of Alberta	45	Mol. Neurodegener.	MAR 25	2021	10.1186/s13024-021-00443-6	Neurosciences	Neurosciences & Neurology
scRNA-seq	neuroinflammation	human	human iPSCs	GSE133755, GSE148212	Mazzara, PG; Muggeo, S; Luoni, M; Massimino, L; Zaghi, M; Valverde, PTT; Brusco, S; Marzi, MJ; Palma, C; Colasante, G; Iannielli, A; Paulis, M; Cordiglieri, C; Giannelli, SG; Podini, P; Gellera, C; Taroni, F; Nicassio, F; Rasponi, M; Broccoli, V	Mazzara, Pietro Giuseppe; Muggeo, Sharon; Luoni, Mirko; Massimino, Luca; Zaghi, Mattia; Valverde, Parisa Tajalli-Tehrani; Brusco, Simone; Marzi, Matteo Jacopo; Palma, Cecilia; Colasante, Gaia; Iannielli, Angelo; Paulis, Marianna; Cordiglieri, Chiara; Giannelli, Serena Gea; Podini, Paola; Gellera, Cinzia; Taroni, Franco; Nicassio, Francesco; Rasponi, Marco; Broccoli, Vania	Frataxin gene editing rescues Friedreich's ataxia pathology in dorsal root ganglia organoid-derived sensory neurons	NATURE COMMUNICATIONS		REPEAT-EXPANSION; MOLECULAR-MECHANISMS; EPIGENETIC CHANGES; MOUSE MODEL; CELLS; SPECIFICATION; INNERVATION; FIBROBLASTS; BIOGENESIS; DEFICIENCY	Vita-Salute San Raffaele University; IRCCS Ospedale San Raffaele; Istituto Italiano di Tecnologia - IIT; Polytechnic University of Milan; Consiglio Nazionale delle Ricerche (CNR); Fondazione IRCCS Istituto Neurologico Carlo Besta; Scripps Research Institute	44	Nat. Commun.	AUG 21	2020	10.1038/s41467-020-17954-3	Multidisciplinary Sciences	Science & Technology - Other Topics
scRNA-seq	Alzheimer’s disease	human	postmortem prefrontal cortex brain	syn52293417	Mathys, H; Peng, ZY; Boix, CA; Victor, MB; Leary, N; Babu, S; Abdelhady, G; Jiang, XQ; Ng, AP; Ghafari, K; Kunisky, AK; Mantero, J; Galani, K; Lohia, VN; Fortier, GE; Lotfi, Y; Ivey, J; Brown, HP; Patel, PR; Chakraborty, N; Beaudway, JI; Imhoff, EJ; Keeler, CF; Mcchesney, MM; Patel, HH; Patel, SP; Thai, MT; Bennett, DA; Kellis, M; Tsai, LH	Mathys, Hansruedi; Peng, Zhuyu; Boix, Carles A.; Victor, Matheus B.; Leary, Noelle; Babu, Sudhagar; Abdelhady, Ghada; Jiang, Xueqiao; Ng, Ayesha P.; Ghafari, Kimia; Kunisky, Alexander K.; Mantero, Julio; Galani, Kyriaki; Lohia, Vanshika N.; Fortier, Gabrielle E.; Lotfi, Yasmine; Ivey, Jason; Brown, Hannah P.; Patel, Pratham R.; Chakraborty, Nehal; Beaudway, Jacob I.; Imhoff, Elizabeth J.; Keeler,…	Single-cell atlas reveals correlates of high cognitive function, dementia, and resilience to Alzheimer's disease pathology	CELL		DIFFERENTIAL EXPRESSION ANALYSIS; GENE-EXPRESSION; RNA-SEQ; GENOMIC STABILITY; NATURAL-HISTORY; CORTEX; NETWORKS; PATTERNS; MEMORY; REPAIR	Massachusetts Institute of Technology (MIT); Massachusetts Institute of Technology (MIT); Pennsylvania Commonwealth System of Higher Education (PCSHE); University of Pittsburgh; Pennsylvania Commonwealth System of Higher Education (PCSHE); University of Pittsburgh; Massachusetts Institute of Technology (MIT); Harvard University; Massachusetts Institute of Technology (MIT); Broad Institute; Rush U…	43	Cell	SEP 28	2023	10.1016/j.cell.2023.08.039	Biochemistry & Molecular Biology; Cell Biology	Biochemistry & Molecular Biology; Cell Biology
scRNA-seq	Amyotrophic lateral sclerosis	mouse	brainstem	GSE178693	Liu, WT; Venugopal, S; Majid, S; Ahn, IS; Diamante, G; Hong, J; Yang, X; Chandler, SH	Liu, Wenting; Venugopal, Sharmila; Majid, Sana; Ahn, In Sook; Diamante, Graciel; Hong, Jason; Yang, Xia; Chandler, Scott H.	Single-cell RNA-seq analysis of the brainstem of mutant SOD1 mice reveals perturbed cell types and pathways of amyotrophic lateral sclerosis	NEUROBIOLOGY OF DISEASE	ALS; Motor neurons; Glial cells; Brainstem; Drop-seq; Single cell RNA-seq; scRNA-seq; Transcriptome; SOD1 (G93A) mutant	MOTOR-NEURONS; ANALYSES IDENTIFY; MOUSE MODEL; DEGENERATION; DIVERSITY; ALS; VULNERABILITY; PROGRESSION; HYPEREXCITABILITY; MICROGLIA	University of California System; University of California Los Angeles; University of California System; University of California Los Angeles; University of California System; University of California Los Angeles	43	Neurobiol. Dis.	JUL	2020	10.1016/j.nbd.2020.104877	Neurosciences	Neurosciences & Neurology
scRNA-seq	multiple sclerosis	human	pluripotent stem cells	GSE146373	Chamling, X; Kallman, A; Fang, WX; Berlinicke, CA; Mertz, JL; Devkota, P; Pantoja, IEM; Smith, MD; Ji, ZC; Chang, C; Kaushik, A; Chen, LB; Whartenby, KA; Calabresi, PA; Mao, HQ; Ji, HK; Wang, TH; Zack, DJ	Chamling, Xitiz; Kallman, Alyssa; Fang, Weixiang; Berlinicke, Cynthia A.; Mertz, Joseph L.; Devkota, Prajwal; Pantoja, Itzy E. Morales; Smith, Matthew D.; Ji, Zhicheng; Chang, Calvin; Kaushik, Aniruddha; Chen, Liben; Whartenby, Katharine A.; Calabresi, Peter A.; Mao, Hai-Quan; Ji, Hongkai; Wang, Tza-Huei; Zack, Donald J.	Single-cell transcriptomic reveals molecular diversity and developmental heterogeneity of human stem cell-derived oligodendrocyte lineage cells	NATURE COMMUNICATIONS		PROGENITOR CELLS; EFFICIENT GENERATION; DIFFERENTIATION; ASTROCYTES; MYELIN; BRAIN; FATE; ACTIVATION; RECEPTOR; BIOLOGY	Johns Hopkins University; Johns Hopkins Medicine; Johns Hopkins University; Johns Hopkins University; Johns Hopkins Bloomberg School of Public Health; University of Miami; Johns Hopkins University; Johns Hopkins University; Johns Hopkins Medicine; Johns Hopkins University; Johns Hopkins University; Johns Hopkins University; Johns Hopkins Medicine; Johns Hopkins University; Johns Hopkins University	41	Nat. Commun.	JAN 28	2021	10.1038/s41467-021-20892-3	Multidisciplinary Sciences	Science & Technology - Other Topics
scRNA-seq	Alzheimer’s disease	human	postmortem brain	GSE146639	Alsema, AM; Jiang, Q; Kracht, L; Gerrits, E; Dubbelaar, ML; Miedema, A; Brouwer, N; Hol, EM; Middeldorp, J; van Dijk, R; Woodbury, M; Wachter, A; Xi, S; Möller, T; Biber, KP; Kooistra, SM; Boddeke, EWGM; Eggen, BJL	Alsema, Astrid M.; Jiang, Qiong; Kracht, Laura; Gerrits, Emma; Dubbelaar, Marissa L.; Miedema, Anneke; Brouwer, Nieske; Hol, Elly M.; Middeldorp, Jinte; van Dijk, Roland; Woodbury, Maya; Wachter, Astrid; Xi, Simon; Moller, Thomas; Biber, Knut P.; Kooistra, Susanne M.; Boddeke, Erik W. G. M.; Eggen, Bart J. L.	Profiling Microglia From Alzheimer's Disease Donors and Non-demented Elderly in Acute Human Postmortem Cortical Tissue	FRONTIERS IN MOLECULAR NEUROSCIENCE	Alzheimer’ s disease; microglia; single-cell RNA sequencing; barcoded Smart-seq2; human	AMYLOID-BETA; RNA-SEQ; EXPRESSION; MOUSE; ACTIVATION; PACKAGE; LIGAND; CELLS	University of Groningen; Utrecht University; Utrecht University Medical Center; AbbVie; AbbVie; University of Copenhagen	40	Front. Molec. Neurosci.	OCT 28	2020	10.3389/fnmol.2020.00134	Neurosciences	Neurosciences & Neurology
scRNA-seq	Parkinson’s disease	mouse	midbrain	GSE115070	Kramer, DJ; Risso, D; Kosillo, P; Ngai, J; Bateup, HS	Kramer, Daniel J.; Risso, Davide; Kosillo, Polina; Ngai, John; Bateup, Helen S.	Combinatorial Expression of Grp and Neurod6 Defines Dopamine Neuron Populations with Distinct Projection Patterns and Disease Vulnerability	ENEURO	Dopamine Neurons; Grp; Neurod6; Retrograde Tracing; Single-Cell RNA-Sequencing; VTA; Cellular Heterogeneity	VENTRAL TEGMENTAL AREA; SUBSTANTIA-NIGRA; GENE-EXPRESSION; MOUSE MODELS; MIDBRAIN; DIVERSITY; BRAIN; REWARD; HETEROGENEITY; PROTECTS	University of California System; University of California Berkeley; University of California System; University of California Berkeley; Cornell University; Weill Cornell Medicine	40	eNeuro	MAY-JUN	2018	10.1523/ENEURO.0152-18.2018	Neurosciences	Neurosciences & Neurology
scRNA-seq	Amyotrophic lateral sclerosis	mice	spinal cord	GSE167332	Mifflin, L; Hu, ZR; Dufort, C; Hession, CC; Walker, AJ; Niu, KY; Zhu, H; Liu, N; Liu, JS; Levin, JZ; Stevens, B; Yuan, JY; Zou, CY	Mifflin, Lauren; Hu, Zhirui; Dufort, Connor; Hession, Cynthia C.; Walker, Alec J.; Niu, Kongyan; Zhu, Hong; Liu, Nan; Liu, Jun S.; Levin, Joshua Z.; Stevens, Beth; Yuan, Junying; Zou, Chengyu	A RIPK1-regulated inflammatory microglial state in amyotrophic lateral sclerosis	PROCEEDINGS OF THE NATIONAL ACADEMY OF SCIENCES OF THE UNITED STATES OF AMERICA	RIPK1; ALS; microglia; neuroinflammation; scRNAseq		Harvard University; Harvard Medical School; Harvard University; Harvard University; Boston Children's Hospital; Harvard University; Harvard Medical School; Harvard University; Massachusetts Institute of Technology (MIT); Broad Institute; Chinese Academy of Sciences; Shanghai Institute of Organic Chemistry, CAS	39	Proc. Natl. Acad. Sci. U. S. A.	MAR 30	2021	10.1073/pnas.2025102118	Multidisciplinary Sciences	Science & Technology - Other Topics
scRNA-seq	Alzheimer’s disease	mice	postmortem brain	syn23763409	Yang, HS; Onos, KD; Choi, K; Keezer, KJ; Skelly, DA; Carter, GW; Howell, GR	Yang, Hongtian Stanley; Onos, Kristen D.; Choi, Kwangbom; Keezer, Kelly J.; Skelly, Daniel A.; Carter, Gregory W.; Howell, Gareth R.	Natural genetic variation determines microglia heterogeneity in wild-derived mouse models of Alzheimer's disease	CELL REPORTS		DIFFERENTIAL EXPRESSION ANALYSIS; TRANSGENIC MICE; INFECTION; RESPONSES; PACKAGE; BRAIN	Jackson Laboratory; Tufts University; University of Maine System; University of Maine Orono	38	Cell Reports	FEB 9	2021	10.1016/j.celrep.2021.108739	Cell Biology	Cell Biology
scRNA-seq	neuroinflammation	human	human iPSCs	GSE182307, GSE182308	Leng, K; Rose, IVL; Kim, H; Xia, WL; Romero-Fernandez, W; Rooney, B; Koontz, M; Li, E; Ao, Y; Wang, SN; Krawczyk, M; Tcw, J; Goate, A; Zhang, Y; Ullian, EM; Sofroniew, M; Fancy, SPJ; Schrag, MS; Lippmann, ES; Kampmann, M	Leng, Kun; Rose, Indigo V. L.; Kim, Hyosung; Xia, Wenlong; Romero-Fernandez, Wilber; Rooney, Brendan; Koontz, Mark; Li, Emmy; Ao, Yan; Wang, Shinong; Krawczyk, Mitchell; Tcw, Julia; Goate, Alison; Zhang, Ye; Ullian, Erik M.; Sofroniew, Michael, V; Fancy, Stephen P. J.; Schrag, Matthew S.; Lippmann, Ethan S.; Kampmann, Martin	CRISPRi screens in human iPSC-derived astrocytes elucidate regulators of distinct inflammatory reactive states	NATURE NEUROSCIENCE		ADHESION MOLECULE-1 VCAM-1; FACTORS C/EBP-BETA; SCAR FORMATION; EXPRESSION; CELLS; ACTIVATION; ALZHEIMERS; DELTA; DIFFERENTIATION; INTERLEUKIN-6	University of California System; University of California San Francisco; University of California System; University of California San Francisco; University of California System; University of California San Francisco; University of California System; University of California San Francisco; Vanderbilt University; University of California System; University of California San Francisco; University …	37	Nat. Neurosci.	NOV	2022	10.1038/s41593-022-01180-9	Neurosciences	Neurosciences & Neurology
scRNA-seq	Alzheimer’s disease	mice	hippocampus	syn22313650	Yamazaki, Y; Liu, CC; Yamazaki, A; Shue, F; Martens, YA; Chen, YX; Qiao, WH; Kurti, A; Oue, H; Ren, YX; Li, Y; Aikawa, T; Cherukuri, Y; Fryer, JD; Asmann, YW; Kim, BYS; Kanekiyo, T; Bu, GJ	Yamazaki, Yu; Liu, Chia-Chen; Yamazaki, Akari; Shue, Francis; Martens, Yuka A.; Chen, Yuanxin; Qiao, Wenhui; Kurti, Aishe; Oue, Hiroshi; Ren, Yingxue; Li, Ying; Aikawa, Tomonori; Cherukuri, Yesesri; Fryer, John D.; Asmann, Yan W.; Kim, Betty Y. S.; Kanekiyo, Takahisa; Bu, Guojun	Vascular ApoE4 Impairs Behavior by Modulating Gliovascular Function	NEURON		WHITE-MATTER HYPERINTENSITIES; CENTRAL-NERVOUS-SYSTEM; APOLIPOPROTEIN-E; TARGETED REPLACEMENT; COGNITIVE IMPAIRMENT; ALZHEIMER-DISEASE; DEMENTIA; GENE; MICE; ATHEROSCLEROSIS	Mayo Clinic; Mayo Clinic; Mayo Clinic; Mayo Clinic; Mayo Clinic; Mayo Clinic Phoenix; University of Texas System; UTMD Anderson Cancer Center	38	Neuron	FEB 3	2021	10.1016/j.neuron.2020.11.019	Neurosciences	Neurosciences & Neurology
scRNA-seq	Alzheimer’s disease	human	peripheral blood	GSE168522	Xiong, LL; Xue, LL; Du, RL; Niu, RZ; Chen, L; Chen, J; Hu, Q; Tan, YX; Shang, HF; Liu, J; Yu, CY; Wang, TH	Xiong, Liu-Lin; Xue, Lu-Lu; Du, Ruo-Lan; Niu, Rui-Ze; Chen, Li; Chen, Jie; Hu, Qiao; Tan, Ya-Xin; Shang, Hui-Fang; Liu, Jia; Yu, Chang-Yin; Wang, Ting-Hua	Single-cell RNA sequencing reveals B cell-related molecular biomarkers for Alzheimer's disease	EXPERIMENTAL AND MOLECULAR MEDICINE		OXIDATIVE STRESS; IMMUNE-SYSTEM; EXPRESSION; HEALTH; GENE	Zunyi Medical University; Kunming University of Science & Technology; Sichuan University; Kunming Medical University; Sichuan University; Southwest Medical University; Sichuan University; Zunyi Medical University	37	Exp. Mol. Med.	DEC	2021	10.1038/s12276-021-00714-8	Biochemistry & Molecular Biology; Medicine, Research & Experimental	Biochemistry & Molecular Biology; Research & Experimental Medicine
scRNA-seq	Alzheimer’s disease	mice	quadriceps femoris muscle	undisclosed	Cherry, C; Maestas, DR; Han, J; Andorko, JI; Cahan, P; Fertig, EJ; Garmire, LX; Elisseeff, JH	Cherry, Christopher; Maestas, David R.; Han, Jin; Andorko, James, I; Cahan, Patrick; Fertig, Elana J.; Garmire, Lana X.; Elisseeff, Jennifer H.	Computational reconstruction of the signalling networks surrounding implanted biomaterials from single-cell transcriptomics	NATURE BIOMEDICAL ENGINEERING		ALZHEIMERS-DISEASE; INTERCELLULAR COMMUNICATION; EXPRESSION; WOUNDS; GENE; MECHANISMS; TARGET; REPAIR	Johns Hopkins University; Johns Hopkins University; Johns Hopkins Medicine; Johns Hopkins University; Johns Hopkins University; Johns Hopkins University; Johns Hopkins University; University of Michigan System; University of Michigan; Johns Hopkins University; Johns Hopkins University; Johns Hopkins Medicine	37	Nat. Biomed. Eng	OCT	2021	10.1038/s41551-021-00770-5	Engineering, Biomedical	Engineering
scRNA-seq	Alzheimer’s disease	mice	postmortem brain	GSE223719	Farmer, BC; Williams, HC; Devanney, NA; Piron, MA; Nation, GK; Carter, DJ; Walsh, AE; Khanal, R; Young, LEA; Kluemper, JC; Hernandez, G; Allenger, EJ; Mooney, R; Golden, LR; Smith, CT; Brandon, JA; Gupta, VA; Kern, PA; Gentry, MS; Morganti, JM; Sun, RMC; Johnson, LA	Farmer, Brandon C.; Williams, Holden C.; Devanney, Nicholas A.; Piron, Margaret A.; Nation, Grant K.; Carter, David J.; Walsh, Adeline E.; Khanal, Rebika; Young, Lyndsay E. A.; Kluemper, Jude C.; Hernandez, Gabriela; Allenger, Elizabeth J.; Mooney, Rachel; Golden, Lesley R.; Smith, Cathryn T.; Brandon, J. Anthony; Gupta, Vedant A.; Kern, Philip A.; Gentry, Matthew S.; Morganti, Josh M.; Sun, Ramo…	APOΕ4 lowers energy expenditure in females and impairs glucose oxidation by increasing flux through aerobic glycolysis	MOLECULAR NEURODEGENERATION	APOE; Apolipoprotein E; Aerobic glycolysis; Energy expenditure; Metabolism; Alzheimer's disease	APOLIPOPROTEIN-E; ALZHEIMERS-DISEASE; GENETIC RISK; TARGETED REPLACEMENT; SUBSTRATE OXIDATION; POSTERIOR CINGULATE; HIPPOCAMPAL VOLUME; APOE GENOTYPE; AMYLOID-BETA; METABOLISM	University of Kentucky; University of Kentucky; University of Kentucky; University of Kentucky; University of Kentucky; University of Kentucky; University of Kentucky	37	Mol. Neurodegener.	SEP 6	2021	10.1186/s13024-021-00483-y	Neurosciences	Neurosciences & Neurology
scRNA-seq	neuroinflammation	mice	retinas	GSE184933	Hoang, T; Kim, DW; Appel, H; Pannullo, NA; Leavey, P; Ozawa, M; Zheng, SK; Yu, MZ; Peachey, NS; Blackshaw, S	Hoang, Thanh; Kim, Dong Won; Appel, Haley; Pannullo, Nicole A.; Leavey, Patrick; Ozawa, Manabu; Zheng, Sika; Yu, Minzhong; Peachey, Neal S.; Blackshaw, Seth	Genetic loss of function of Ptbp1 does not induce glia-to-neuron conversion in retina	CELL REPORTS		PARKINSONS-DISEASE; IN-VITRO; ASTROCYTES; MOUSE; EXPRESSION; PTBP1	Johns Hopkins University; Johns Hopkins University; Johns Hopkins University; Johns Hopkins University; Johns Hopkins University; University of Tokyo; University of California System; University of California Riverside; University System of Ohio; Case Western Reserve University; Cleveland Clinic Foundation	36	Cell Reports	JUN 14	2022	10.1016/j.celrep.2022.110849	Cell Biology	Cell Biology
scRNA-seq	Alzheimer’s disease	mice and human	postmortem brain	PRJNA521781	Qiu, CX; Albayram, O; Kondo, A; Wang, B; Kim, N; Arai, K; Tsai, CY; Bassal, MA; Herbert, MK; Washida, K; Angeli, P; Kozono, S; Stucky, JE; Baxley, S; Lin, YM; Sun, Y; Rotenberg, A; Caldarone, BJ; Bigio, EH; Chen, XC; Tenen, DG; Zeidel, M; Lo, EH; Zhou, XZ; Lu, KP	Qiu, Chenxi; Albayram, Onder; Kondo, Asami; Wang, Bin; Kim, Nami; Arai, Ken; Tsai, Cheng-Yu; Bassal, Mahmoud A.; Herbert, Megan K.; Washida, Kazuo; Angeli, Peter; Kozono, Shingo; Stucky, Joseph E.; Baxley, Sean; Lin, Yu-Min; Sun, Yan; Rotenberg, Alexander; Caldarone, Barbara J.; Bigio, Eileen H.; Chen, Xiaochun; Tenen, Daniel G.; Zeidel, Mark; Lo, Eng H.; Zhou, Xiao Zhen; Lu, Kun Ping	Cis P-tau underlies vascular contribution to cognitive impairment and dementia and can be effectively targeted by immunotherapy in mice	SCIENCE TRANSLATIONAL MEDICINE		PROLYL ISOMERASE PIN1; BRAIN-INJURY; ALZHEIMERS-DISEASE; GENE-EXPRESSION; PHOSPHORYLATED TAU; MOUSE MODEL; PATHOGENESIS; ANTIBODY; DEFICITS; REVEAL	Harvard University; Harvard Medical School; Beth Israel Deaconess Medical Center; Harvard University; Beth Israel Deaconess Medical Center; Harvard Medical School; Harvard University; Harvard Medical School; Beth Israel Deaconess Medical Center; Harvard University; Massachusetts Institute of Technology (MIT); Broad Institute; Medical University of South Carolina; Harvard University; Massachusetts…	36	Sci. Transl. Med.	JUN 2	2021	10.1126/scitranslmed.aaz7615	Cell Biology; Medicine, Research & Experimental	Cell Biology; Research & Experimental Medicine
scRNA-seq	multiple sclerosis	human	peripheral blood	GSE150132	Rasouli, J; Casella, G; Yoshimura, S; Zhang, WF; Xiao, D; Garifallou, J; Gonzalez, MV; Wiedeman, A; Kus, A; Mari, ER; Fortina, P; Hakonarson, H; Long, SA; Zhang, GX; Ciric, B; Rostami, A	Rasouli, Javad; Casella, Giacomo; Yoshimura, Satoshi; Zhang, Weifeng; Xiao, Dan; Garifallou, James; Gonzalez, Michael, V; Wiedeman, Alice; Kus, Anna; Mari, Elisabeth R.; Fortina, Paolo; Hakonarson, Hakon; Long, S. Alice; Zhang, Guang-Xian; Ciric, Bogoljub; Rostami, Abdolmohamad	A distinct GM-CSF+ T helper cell subset requires T-bet to adopt a TH1 phenotype and promote neuroinflammation	SCIENCE IMMUNOLOGY		COLONY-STIMULATING FACTOR; MULTIPLE-SCLEROSIS; CYTOKINE; DIFFERENTIATION; EXPRESSION; PLASTICITY; ENCEPHALITOGENICITY; INFLAMMATION; ACTIVATION; RECEPTOR	Jefferson University; Jefferson University; University of Pennsylvania; Pennsylvania Medicine; Childrens Hospital of Philadelphia; Benaroya Research Institute; Virginia Mason Medical Center; Jefferson University; Sapienza University Rome; University of Pennsylvania	35	Sci. Immunol.	OCT	2020	10.1126/sciimmunol.aba9953	Immunology	Immunology
scRNA-seq	neuroinflammation	mice	postmortem brain	GSE112177	Ho, H; De Both, M; Siniard, A; Sharma, S; Notwell, JH; Wallace, M; Leone, DP; Nguyen, A; Zhao, E; Lee, H; Zwilling, D; Thompson, KR; Braithwaite, SP; Huentelman, M; Portmann, T	Ho, Hanson; De Both, Matt; Siniard, Ashley; Sharma, Sasha; Notwell, James H.; Wallace, Michelle; Leone, Dino P.; Nguyen, Amy; Zhao, Eric; Lee, Hannah; Zwilling, Daniel; Thompson, Kimberly R.; Braithwaite, Steven P.; Huentelman, Matthew; Portmann, Thomas	A Guide to Single-Cell Transcriptomics in Adult Rodent Brain: The Medium Spiny Neuron Transcriptome Revisited	FRONTIERS IN CELLULAR NEUROSCIENCE	single-cell RNA sequencing; fluorescence-activated cell sorting; striatal medium spiny neurons; basal ganglia; dopamine receptors; Cholinergic Receptor Muscarinic 4	TRANSLATIONAL PROFILING APPROACH; LIM-HOMEOBOX GENE; D2 DOPAMINE; CHOLINERGIC NEURONS; BASAL GANGLIA; STRIATONIGRAL NEURONS; RECEPTOR PROTEINS; STRIATAL NEURONS; FLOW-CYTOMETRY; MESSENGER-RNA	Translational Genomics Research Institute	35	Front. Cell. Neurosci.	JUN 15	2018	10.3389/fncel.2018.00159	Neurosciences	Neurosciences & Neurology
scRNA-seq	multiple sclerosis	mice and human	spinal cord, postmortem brain, cerebral spinal fluid	GSE180670	Larochelle, C; Wasser, B; Jamann, H; Löffel, JT; Cui, QL; Tastet, O; Schillner, M; Luchtman, D; Birkenstock, J; Stroh, A; Antel, J; Bittner, S; Zipp, F	Larochelle, Catherine; Wasser, Beatrice; Jamann, Helene; Loffel, Julian T.; Cui, Qiao-Ling; Tastet, Olivier; Schillner, Miriam; Luchtman, Dirk; Birkenstock, Jerome; Stroh, Albrecht; Antel, Jack; Bittner, Stefan; Zipp, Frauke	Pro-inflammatory T helper 17 directly harms oligodendrocytes in neuroinflammation	PROCEEDINGS OF THE NATIONAL ACADEMY OF SCIENCES OF THE UNITED STATES OF AMERICA	oligodendrocytes intravital microscopy Th17 cells glutamate CD29 blockade	CENTRAL-NERVOUS-SYSTEM; BLOOD-BRAIN-BARRIER; MULTIPLE-SCLEROSIS; CHOLESTEROL-SYNTHESIS; CELL-ACTIVATION; LYMPHOCYTES; IMMUNE; GLUTAMATE; PROTEIN; TH17	Johannes Gutenberg University of Mainz; Universite de Montreal; McGill University; Johannes Gutenberg University of Mainz	33	Proc. Natl. Acad. Sci. U. S. A.	AUG 20	2021	10.1073/pnas.2025813118	Multidisciplinary Sciences	Science & Technology - Other Topics
scRNA-seq	neuroinflammation	mice	hypothalamic brain	GSE146692	Mickelsen, LE; Flynn, WF; Springer, K; Wilson, L; Beltrami, EJ; Bolisetty, M; Robson, P; Jackson, AC	Mickelsen, Laura E.; Flynn, William F.; Springer, Kristen; Wilson, Lydia; Beltrami, Eric J.; Bolisetty, Mohan; Robson, Paul; Jackson, Alexander C.	Cellular taxonomy and spatial organization of the murine ventral posterior hypothalamus	ELIFE		ANTERIOR THALAMIC NUCLEI; DORSAL PREMAMMILLARY NUCLEUS; NITRIC-OXIDE SYNTHASE; MAMMILLARY BODIES; SUPRAMAMMILLARY NUCLEUS; ALZHEIMERS-DISEASE; MAMILLARY BODY; TUBEROMAMMILLARY NUCLEUS; HISTIDINE DECARBOXYLASE; MESSENGER-RNA	University of Connecticut; Jackson Laboratory; University of Connecticut; University of Connecticut; National Institutes of Health (NIH) - USA; NIH National Institute of Diabetes & Digestive & Kidney Diseases (NIDDK); Bristol-Myers Squibb	33	eLife	OCT 29	2020	10.7554/eLife.58901	Biology	Life Sciences & Biomedicine - Other Topics
scRNA-seq	neuroinflammation	mice	aortic	undisclosed	Endo-Umeda, K; Kim, E; Thomas, DG; Liu, WL; Dou, HJ; Yalcinkaya, M; Abramowicz, S; Xiao, T; Antonson, P; Gustafsson, JÅ; Makishima, M; Reilly, MP; Wang, N; Tall, AR	Endo-Umeda, Kaori; Kim, Eunyoung; Thomas, David G.; Liu, Wenli; Dou, Huijuan; Yalcinkaya, Mustafa; Abramowicz, Sandra; Xiao, Tong; Antonson, Per; Gustafsson, Jan-Ake; Makishima, Makoto; Reilly, Muredach P.; Wang, Nan; Tall, Alan R.	Myeloid LXR (Liver X Receptor) Deficiency Induces Inflammatory Gene Expression in Foamy Macrophages and Accelerates Atherosclerosis	ARTERIOSCLEROSIS THROMBOSIS AND VASCULAR BIOLOGY	atherosclerosis; cholesterol; foam cell; macrophage; obesity	CHOLESTEROL; 12/15-LIPOXYGENASE; ACCUMULATION; DISRUPTION; METABOLISM; DIVERSITY	Columbia University; Columbia University; Cornell University; Weill Cornell Medicine; NewYork-Presbyterian Hospital; Nihon University; Karolinska Institutet; University of Houston System; University of Houston	32	Arterioscler. Thromb. Vasc. Biol.	JUN	2022	10.1161/ATVBAHA.122.317583	Hematology; Peripheral Vascular Disease	Hematology; Cardiovascular System & Cardiology
scRNA-seq	Alzheimer’s disease	mice	hippocampus	GSE160512, GSE181786, GSE153895	Lee, SH; Rezzonico, MG; Friedman, BA; Huntley, MH; Meilandt, WJ; Pandey, S; Chen, YJJ; Easton, A; Modrusan, Z; Hansen, DV; Sheng, MG; Bohlen, CJ	Lee, Seung-Hye; Rezzonico, Mitchell G.; Friedman, Brad A.; Huntley, Melanie H.; Meilandt, William J.; Pandey, Shristi; Chen, Ying-Jiun J.; Easton, Amy; Modrusan, Zora; Hansen, David, V; Sheng, Morgan; Bohlen, Christopher J.	TREM2-independent oligodendrocyte, astrocyte, and T cell responses to tau and amyloid pathology in mouse models of Alzheimer disease	CELL REPORTS		MICROGLIAL RESPONSE; TRANSGENIC MICE; TREM2; BETA; NEURODEGENERATION; EXPRESSION; TRANSCRIPTOMICS; HETEROGENEITY; ACTIVATION; DEPOSITION	Roche Holding; Genentech; Roche Holding; Genentech; Roche Holding; Genentech; Brigham Young University; Harvard University; Massachusetts Institute of Technology (MIT); Broad Institute	31	Cell Reports	DEC 28	2021	10.1016/j.celrep.2021.110158	Cell Biology	Cell Biology
scRNA-seq	neuroinflammation	mice	retinas	GSE211077	Todd, L; Jenkins, W; Finkbeiner, C; Hooper, MJ; Donaldson, PC; Pavlou, M; Wohlschlegel, J; Ingram, N; Rieke, F; Reh, TA	Todd, Levi; Jenkins, Wesley; Finkbeiner, Connor; Hooper, Marcus J.; Donaldson, Phoebe C.; Pavlou, Marina; Wohlschlegel, Juliette; Ingram, Norianne; Rieke, Fred; Reh, Thomas A.	Reprogramming Mu?ller glia to regenerate ganglion-like cells in adult mouse retina with developmental transcription factors	SCIENCE ADVANCES		INDUCED NEURONS; EXPRESSION; PATHWAY; ASCL1; ISL1; DIFFERENTIATION; CONVERSION	University of Washington; University of Washington Seattle; University of Washington; University of Washington Seattle	30	Sci. Adv.	NOV 25	2022	10.1126/sciadv.abq7219	Multidisciplinary Sciences	Science & Technology - Other Topics
scRNA-seq	Amyotrophic lateral sclerosis	human	cerebral spinal fluid and blood	EGAS00001006675	Yazdani, S; Seitz, C; Cui, C; Lovik, A; Pan, L; Piehl, F; Pawitan, Y; Kläppe, U; Press, R; Samuelsson, K; Yin, L; Vu, TN; Joly, AL; Westerberg, LS; Evertsson, B; Ingre, C; Andersson, J; Fang, F	Yazdani, Solmaz; Seitz, Christina; Cui, Can; Lovik, Aniko; Pan, Lu; Piehl, Fredrik; Pawitan, Yudi; Klappe, Ulf; Press, Rayomand; Samuelsson, Kristin; Yin, Li; Vu, Trung Nghia; Joly, Anne-Laure; Westerberg, Lisa S.; Evertsson, Bjorn; Ingre, Caroline; Andersson, John; Fang, Fang	T cell responses at diagnosis of amyotrophic lateral sclerosis predict disease progression	NATURE COMMUNICATIONS		MODEL	Karolinska Institutet; Karolinska Institutet; Karolinska Institutet; Karolinska Institutet; Karolinska University Hospital; Karolinska Institutet	30	Nat. Commun.	NOV 8	2022	10.1038/s41467-022-34526-9	Multidisciplinary Sciences	Science & Technology - Other Topics
scRNA-seq	neuroinflammation	mice	postmortem brain	GSE133283	Jeong, HW; Diéguez-Hurtado, R; Arf, H; Song, J; Park, H; Kruse, K; Sorokin, L; Adams, RH	Jeong, Hyun-Woo; Dieguez-Hurtado, Rodrigo; Arf, Hendrik; Song, Jian; Park, Hongryeol; Kruse, Kai; Sorokin, Lydia; Adams, Ralf H.	Single-cell transcriptomics reveals functionally specialized vascular endothelium in brain	ELIFE	blood-brain barrier; vasculature; single-cell RNA sequencing; non-neuronal cell populations; Mouse	CENTRAL-NERVOUS-SYSTEM; MULTIPLE-SCLEROSIS; BARRIER; HEALTH; MACROPHAGES; DYNAMICS; ICAM-1; ROLES; POLARIZATION; TRAFFICKING	Max Planck Society; University of Munster; University of Munster	29	eLife	OCT 5	2022	10.7554/eLife.57520	Biology	Life Sciences & Biomedicine - Other Topics
scRNA-seq	Alzheimer’s disease	mice	postmortem brain	GSE195650	Tsai, AP; Dong, CP; Lin, PBC; Messenger, EJ; Casali, BT; Moutinho, M; Liu, YL; Oblak, AL; Lamb, BT; Landreth, GE; Bissel, SJ; Nho, K	Tsai, Andy P.; Dong, Chuanpeng; Lin, Peter Bor-Chian; Messenger, Evan J.; Casali, Brad T.; Moutinho, Miguel; Liu, Yunlong; Oblak, Adrian L.; Lamb, Bruce T.; Landreth, Gary E.; Bissel, Stephanie J.; Nho, Kwangsik	PLCG2 is associated with the inflammatory response and is induced by amyloid plaques in Alzheimer's disease	GENOME MEDICINE	Alzheimer's disease; Microglia; PLCG2; Inflammatory response; Co-expression network analysis; Single-cell RNA-Seq analysis	MICROGLIA; VARIANTS; IMMUNITY; TREM2; RISK; GENE; ABI3; AGE	Indiana University System; Indiana University Bloomington; Indiana University System; Indiana University Bloomington; University System of Ohio; Northeast Ohio Medical University (NEOMED); Indiana University System; Indiana University Bloomington; Indiana University System; Indiana University Bloomington; Indiana University System; Indiana University Bloomington	30	Genome Med.	FEB 18	2022	10.1186/s13073-022-01022-0	Genetics & Heredity	Genetics & Heredity
scRNA-seq	neuroinflammation	mice	cortex	undisclosed	Cadiz, MP; Jensen, TD; Sens, JP; Zhu, KX; Song, WM; Zhang, B; Ebbert, M; Chang, R; Fryer, JD	Cadiz, Mika P.; Jensen, Tanner D.; Sens, Jonathon P.; Zhu, Kuixi; Song, Won-Min; Zhang, Bin; Ebbert, Mark; Chang, Rui; Fryer, John D.	Culture shock: microglial heterogeneity, activation, and disrupted single-cell microglial networks in vitro	MOLECULAR NEURODEGENERATION	Microglia; In vitro culture; Single cell RNA sequencing; Causal network analysis	ALZHEIMERS-DISEASE; NEURODEGENERATION; RESPONSES; SUSTAINS	Mayo Clinic; Mayo Clinic Phoenix; Mayo Clinic; Mayo Clinic Phoenix; University of Arizona; Icahn School of Medicine at Mount Sinai; University of Kentucky; University of Kentucky	29	Mol. Neurodegener.	MAR 28	2022	10.1186/s13024-022-00531-1	Neurosciences	Neurosciences & Neurology
scRNA-seq	multiple sclerosis	human	postmortem brain	GSE179427	Miedema, A; Gerrits, E; Brouwer, N; Jiang, Q; Kracht, L; Meijer, M; Nutma, E; Peferoen-Baert, R; Pijnacker, ATE; Wesseling, EM; Wijering, MHC; Gabius, HJ; Amor, S; Eggen, BJL; Kooistra, SM	Miedema, Anneke; Gerrits, Emma; Brouwer, Nieske; Jiang, Qiong; Kracht, Laura; Meijer, Michel; Nutma, Erik; Peferoen-Baert, Regina; Pijnacker, Anna T. E.; Wesseling, Evelyn M.; Wijering, Marion H. C.; Gabius, Hans-Joachim; Amor, Sandra; Eggen, Bart J. L.; Kooistra, Susanne M.	Brain macrophages acquire distinct transcriptomes in multiple sclerosis lesions and normal appearing white matter	ACTA NEUROPATHOLOGICA COMMUNICATIONS	Multiple sclerosis; Brain macrophages; Microglia; Single-cell RNAseq; Normal appearing white matter	EXPRESSION; MICROGLIA; MODULATION; REVEALS	University of Groningen; University of Groningen; University of Munich; Vrije Universiteit Amsterdam; University of Amsterdam	29	Acta Neuropathol. Commun.	JAN 28	2022	10.1186/s40478-021-01306-3	Neurosciences	Neurosciences & Neurology
scRNA-seq	neuroinflammation	mice	spinal cord, postmortem brain	GSE188162, GSE188161, GSE188160	Alam, MS; Otsuka, S; Wong, N; Abbasi, A; Gaida, MM; Fan, Y; Meerzaman, D; Ashwell, JD	Alam, Muhammad S.; Otsuka, Shizuka; Wong, Nathan; Abbasi, Aamna; Gaida, Matthias M.; Fan, Yu; Meerzaman, Daoud; Ashwell, Jonathan D.	TNF plays a crucial role in inflammation by signaling via T cell TNFR2	PROCEEDINGS OF THE NATIONAL ACADEMY OF SCIENCES OF THE UNITED STATES OF AMERICA	Th skewing; GM-CSF; inflammatory disease; TNFR2	TH17 CELLS; HELPER-CELLS; GM-CSF; INDUCTION; GENERATION; T(H)17; STAT3; PATHOGENESIS; INHIBITION; CYTOKINES	National Institutes of Health (NIH) - USA; NIH National Cancer Institute (NCI); National Institutes of Health (NIH) - USA; NIH National Cancer Institute (NCI); National Institutes of Health (NIH) - USA; NIH National Cancer Institute (NCI); Frederick National Laboratory for Cancer Research; Johannes Gutenberg University of Mainz; Johannes Gutenberg University of Mainz; National Institutes of Healt…	29	Proc. Natl. Acad. Sci. U. S. A.	DEC 14	2021	10.1073/pnas.2109972118	Multidisciplinary Sciences	Science & Technology - Other Topics
scRNA-seq	neuroinflammation	mice and human	spinal cord	GSE142849	Hakim, R; Zachariadis, V; Sankavaram, SR; Han, JM; Harris, RA; Brundin, L; Enge, M; Svensson, M	Hakim, Ramil; Zachariadis, Vasilios; Sankavaram, Sreenivasa Raghavan; Han, Jinming; Harris, Robert A.; Brundin, Lou; Enge, Martin; Svensson, Mikael	Spinal Cord Injury Induces Permanent Reprogramming of Microglia into a Disease-Associated State Which Contributes to Functional Recovery	JOURNAL OF NEUROSCIENCE	Basso mouse scale; disease-associated microglia; scRNAseq; spinal cord injury	ALZHEIMERS-DISEASE; ACTIVATION STATES; RNA-SEQ; EXPRESSION; CELLS; RAMIFICATION; MONOCYTES	Karolinska Institutet; Karolinska Institutet; Karolinska University Hospital; Karolinska Institutet	28	J. Neurosci.	OCT 6	2021	10.1523/JNEUROSCI.0860-21.2021	Neurosciences	Neurosciences & Neurology
scRNA-seq	multiple sclerosis	mice	postmortem brain	PRJNA745189	Dopkins, N; Miranda, K; Wilson, K; Holloman, BL; Nagarkatti, P; Nagarkatti, M	Dopkins, Nicholas; Miranda, Kathryn; Wilson, Kiesha; Holloman, Bryan L.; Nagarkatti, Prakash; Nagarkatti, Mitzi	Effects of Orally Administered Cannabidiol on Neuroinflammation and Intestinal Inflammation in the Attenuation of Experimental Autoimmune Encephalomyelitis	JOURNAL OF NEUROIMMUNE PHARMACOLOGY	Neuroinflammation; Multiple sclerosis; Cannabidiol; Experimental autoimmune encephalomyelitis; Cannabinoids	MULTIPLE-SCLEROSIS; PPAR-GAMMA; T-CELLS; SUPPRESSOR-CELLS; INDUCTION; DIFFERENTIATION; ACTIVATION; IL-1-BETA; MONOCYTES; DIAGNOSIS	University of South Carolina System; University of South Carolina Columbia	28	J. Neuroimmune Pharm.	JUN	2022	10.1007/s11481-021-10023-6	Neurosciences; Pharmacology & Pharmacy	Neurosciences & Neurology; Pharmacology & Pharmacy
scFIND-seq	multiple sclerosis	mice and human	postmortem brain	GSE198971	Clark, IC; Wheeler, MA; Lee, HG; Li, ZR; Sanmarco, LM; Thaploo, S; Polonio, CM; Shin, SW; Scalisi, G; Henry, AR; Rone, JM; Giovannoni, F; Charabati, M; Akl, CF; Aleman, DM; Zandee, SEJ; Prat, A; Douek, DC; Boritz, EA; Quintana, FJ; Abate, AR	Clark, Iain C. C.; Wheeler, Michael A. A.; Lee, Hong-Gyun; Li, Zhaorong; Sanmarco, Liliana M. M.; Thaploo, Shravan; Polonio, Carolina M. M.; Shin, Seung Won; Scalisi, Giulia; Henry, Amy R. R.; Rone, Joseph M. M.; Giovannoni, Federico; Charabati, Marc; Akl, Camilo Faust; Aleman, Dulce M. M.; Zandee, Stephanie E. J.; Prat, Alexandre; Douek, Daniel C. C.; Boritz, Eli A. A.; Quintana, Francisco J. J.…	Identification of astrocyte regulators by nucleic acid cytometry	NATURE		CENTRAL-NERVOUS-SYSTEM; XBP-1; INFLAMMATION; MACROPHAGES; SUBSET	Harvard University; Harvard Medical School; Brigham & Women's Hospital; University of California System; University of California San Francisco; University of California System; University of California Berkeley; Harvard University; Massachusetts Institute of Technology (MIT); Broad Institute; National Institutes of Health (NIH) - USA; NIH National Institute of Allergy & Infectious Diseases (NIAI…	27	Nature	FEB 9	2023	10.1038/s41586-022-05613-0	Multidisciplinary Sciences	Science & Technology - Other Topics
scRNA-seq	Parkinson’s disease	mice	murine nigrostriatal	GSE148393	Huarte, OU; Kyriakis, D; Heurtaux, T; Pires-Afonso, Y; Grzyb, K; Halder, R; Buttini, M; Skupin, A; Mittelbronn, M; Michelucci, A	Huarte, Oihane Uriarte; Kyriakis, Dimitrios; Heurtaux, Tony; Pires-Afonso, Yolanda; Grzyb, Kamil; Halder, Rashi; Buttini, Manuel; Skupin, Alexander; Mittelbronn, Michel; Michelucci, Alessandro	Single-Cell Transcriptomics and In Situ Morphological Analyses Reveal Microglia Heterogeneity Across the Nigrostriatal Pathway	FRONTIERS IN IMMUNOLOGY	microglia; nigrostriatal pathway; single-cell transcriptomics; cellular heterogeneity; immune alerted; cell morphology; Parkinson’ s disease	ALPHA-SYNUCLEIN; DISEASE; BRAIN; FATE; MACROPHAGES; EXPOSURE; ORIGIN; MOUSE	University of Luxembourg; University of Luxembourg; Luxembourg Institute of Health; University of Luxembourg; University of California System; University of California San Diego; Luxembourg Institute of Health	28	Front. Immunol.	MAR 29	2021	10.3389/fimmu.2021.639613	Immunology	Immunology
scRNA-seq	Alzheimer’s disease	mice	postmortem brain	GSE161224, GSE161227	Zhao, N; Qiao, WH; Li, FY; Ren, YX; Zheng, JY; Martens, YA; Wang, XS; Li, L; Liu, CC; Chen, K; Zhu, YY; Ikezu, TC; Li, ZH; Meneses, AD; Jin, YJ; Knight, JA; Chen, YX; Bastea, L; Linares, C; Sonustun, B; Job, L; Smith, ML; Xie, ML; Liu, YU; Umpierre, AD; Haruwaka, K; Quicksall, ZS; Storz, P; Asmann, YW; Wu, LJ; Bu, GJ	Zhao, Na; Qiao, Wenhui; Li, Fuyao; Ren, Yingxue; Zheng, Jiaying; Martens, Yuka A.; Wang, Xusheng; Li, Ling; Liu, Chia-Chen; Chen, Kai; Zhu, Yiyang; Ikezu, Tadafumi C.; Li, Zonghua; Meneses, Axel D.; Jin, Yunjung; Knight, Joshua A.; Chen, Yixing; Bastea, Ligia; Linares, Cynthia; Sonustun, Berkiye; Job, Lucy; Smith, Madeleine L.; Xie, Manling; Liu, Yong U.; Umpierre, Anthony D.; Haruwaka, Koichiro;…	Elevating microglia TREM2 reduces amyloid seeding and suppresses disease-associated microglia	JOURNAL OF EXPERIMENTAL MEDICINE		AMELIORATES PATHOLOGICAL PHENOTYPES; ALZHEIMERS-DISEASE; MOUSE MODEL; APOLIPOPROTEIN-E; CELLS; BETA; DEFICIENCY; NEURODEGENERATION; MUTATIONS; VARIANTS	Mayo Clinic; Mayo Clinic; Mayo Clinic; Mayo Clinic; University of North Dakota Grand Forks; Mayo Clinic	27	J. Exp. Med.	SEP 15	2022	10.1084/jem.20212479	Immunology; Medicine, Research & Experimental	Immunology; Research & Experimental Medicine
scRNA-seq	neuroinflammation	mice	spinal cord	GSE189070	Hou, JX; Bi, HR; Ge, QT; Teng, HJ; Wan, GQ; Yu, B; Jiang, Q; Gu, XS	Hou, Jinxing; Bi, Huiru; Ge, Qiting; Teng, Huajian; Wan, Guoqiang; Yu, Bin; Jiang, Qing; Gu, Xiaosong	Heterogeneity analysis of astrocytes following spinal cord injury at single-cell resolution	FASEB JOURNAL	astrocytes; heterogeneity; single-cell RNA sequencing; spinal cord injury	REACTIVE ASTROCYTES; ALZHEIMERS-DISEASE; DUAL ROLE; REGENERATION; PROTEIN; NEUROPROTECTION; ASTROGLIOSIS; REPAIR; CORTEX; SCAR	Nanjing University; Nanjing University; Nantong University; Nantong University	27	Faseb J.	AUG	2022	10.1096/fj.202200463R	Biochemistry & Molecular Biology; Biology; Cell Biology	Biochemistry & Molecular Biology; Life Sciences & Biomedicine - Other Topics; Cell Biology
scRNA-seq	Alzheimer’s disease	mice	peripheral blood	GSE229376	Mendiola, AS; Yan, ZQ; Dixit, K; Johnson, JR; Bouhaddou, M; Meyer-Franke, A; Shin, MG; Yong, Y; Agrawal, A; MacDonald, E; Muthukumar, G; Pearce, C; Arun, N; Cabriga, B; Meza-Acevedo, R; Alzamora, MDS; Zamvil, SS; Pico, AR; Ryu, JK; Krogan, NJ; Akassoglou, K	Mendiola, Andrew S.; Yan, Zhaoqi; Dixit, Karuna; Johnson, Jeffrey R.; Bouhaddou, Mehdi; Meyer-Franke, Anke; Shin, Min-Gyoung; Yong, Yu; Agrawal, Ayushi; MacDonald, Eilidh; Muthukumar, Gayathri; Pearce, Clairice; Arun, Nikhita; Cabriga, Belinda; Meza-Acevedo, Rosa; Alzamora, Maria del Pilar S.; Zamvil, Scott S.; Pico, Alexander R.; Ryu, Jae Kyu; Krogan, Nevan J.; Akassoglou, Katerina	Defining blood-induced microglia functions in neurodegeneration through multiomic profiling	NATURE IMMUNOLOGY		ALZHEIMER-DISEASE; INNATE IMMUNITY; R PACKAGE; FIBRINOGEN; MICE; REMYELINATION; COMPLEMENT; EXPRESSION; DEFICIENT; FIBRIN(OGEN)	University of California System; University of California San Francisco; The J David Gladstone Institutes; University of California System; University of California San Francisco; University of California System; University of California Los Angeles; University of California System; University of California San Francisco; University of California System; University of California San Francisco; Un…	26	Nat. Immunol.	JUL	2023	10.1038/s41590-023-01522-0	Immunology	Immunology
scRNA-seq	Alzheimer’s disease	mice	peripheral blood	GSE205569	Yin, ZR; Herron, S; Silveira, S; Kleemann, K; Gauthier, C; Mallah, D; Cheng, YR; Margeta, MA; Pitts, KM; Barry, JL; Subramanian, A; Shorey, H; Brandao, W; Durao, A; Delpech, JC; Madore, C; Jedrychowski, M; Ajay, AK; Murugaiyan, G; Hersh, SW; Ikezu, S; Ikezu, T; Butovsky, O	Yin, Zhuoran; Herron, Shawn; Silveira, Sebastian; Kleemann, Kilian; Gauthier, Christian; Mallah, Dania; Cheng, Yiran; Margeta, Milica A.; Pitts, Kristen M.; Barry, Jen-Li; Subramanian, Ayshwarya; Shorey, Hannah; Brandao, Wesley; Durao, Ana; Delpech, Jean-Christophe; Madore, Charlotte; Jedrychowski, Mark; Ajay, Amrendra K.; Murugaiyan, Gopal; Hersh, Samuel W.; Ikezu, Seiko; Ikezu, Tsuneya; Butovsk…	Identification of a protective microglial state mediated by miR-155 and interferon-γ signaling in a mouse model of Alzheimer's disease	NATURE NEUROSCIENCE		CENTRAL-NERVOUS-SYSTEM; MICRORNA-155; EXPRESSION; RESPONSES; MICE; METAANALYSIS; MACROPHAGES; SEQUENCES; NETWORK; DRIVES	Harvard University; Brigham & Women's Hospital; Harvard Medical School; Harvard University; Harvard Medical School; Brigham & Women's Hospital; Boston University; University of Portsmouth; Harvard University; Harvard Medical School; Massachusetts Eye & Ear Infirmary; Harvard University; Massachusetts Institute of Technology (MIT); Broad Institute; Harvard University; Brigham & Women's Hospital; H…	26	Nat. Neurosci.	JUL	2023	10.1038/s41593-023-01355-y	Neurosciences	Neurosciences & Neurology
scRNA-seq	Alzheimer’s disease	mice	peripheral blood	GSE241553	Liu, CC; Wang, N; Chen, YX; Inoue, Y; Shue, F; Ren, YX; Wang, MH; Qiao, WH; Ikezu, TC; Li, ZH; Zhao, J; Martens, Y; Doss, SV; Rosenberg, CL; Jeevaratnam, S; Jia, L; Raulin, AC; Qi, FF; Zhu, YY; Alnobani, A; Knight, J; Chen, YX; Linares, C; Kurti, A; Fryer, JD; Zhang, B; Wu, LJ; Kim, BYS; Bu, GJ	Liu, Chia-Chen; Wang, Na; Chen, Yuanxin; Inoue, Yasuteru; Shue, Francis; Ren, Yingxue; Wang, Minghui; Qiao, Wenhui; Ikezu, Tadafumi C.; Li, Zonghua; Zhao, Jing; Martens, Yuka; Doss, Sydney V.; Rosenberg, Cassandra L.; Jeevaratnam, Suren; Jia, Lin; Raulin, Ana-Caroline; Qi, Fangfang; Zhu, Yiyang; Alnobani, Alla; Knight, Joshua; Chen, Yixing; Linares, Cynthia; Kurti, Aishe; Fryer, John D.; Zhang, B…	Cell-autonomous effects of APOE4 in restricting microglial response in brain homeostasis and Alzheimer's disease	NATURE IMMUNOLOGY		TAU-MEDIATED NEURODEGENERATION; APOLIPOPROTEIN-E; AMYLOID PATHOLOGY; MOUSE MODEL; MACROPHAGES; MECHANISMS; DEPOSITION; EXPRESSION; SYSTEM	Mayo Clinic; Biogen; Mayo Clinic; Mayo Clinic; Icahn School of Medicine at Mount Sinai; Mayo Clinic; Mayo Clinic Phoenix; University of Texas System; UTMD Anderson Cancer Center; Hong Kong University of Science & Technology	25	Nat. Immunol.	NOV	2023	10.1038/s41590-023-01640-9	Immunology	Immunology
scRNA-seq	Alzheimer’s disease	mice	hippocampus	PRJNA843184	Sun, Y; Zhang, HW; Zhang, X; Wang, WZ; Chen, Y; Cai, ZY; Wang, QH; Wang, J; Shi, Y	Sun, Yan; Zhang, Huaiwu; Zhang, Xuan; Wang, Wenzhao; Chen, Yong; Cai, Zhiyou; Wang, Qihui; Wang, Jun; Shi, Yi	Promotion of astrocyte-neuron glutamate-glutamine shuttle by SCFA contributes to the alleviation of Alzheimer?s disease	REDOX BIOLOGY	Alzheimer?s disease; Short chain fatty acids; Astrocyte; ROS; Neuroenergetics; Glutamate-glutamine shuttle	BRAIN ENERGY-METABOLISM; OXIDATIVE STRESS; SODIUM-BUTYRATE; FATTY-ACIDS; DNA-DAMAGE; SYSTEM; MODEL; MODULATION; LACTATE	Chinese Academy of Sciences; University of Chinese Academy of Sciences, CAS; Chinese Academy of Sciences; Institute of Microbiology, CAS; Chinese Academy of Sciences; Institute of Microbiology, CAS; Chinese Academy of Sciences; University of Chinese Academy of Sciences, CAS; Chinese Academy of Sciences	25	Redox Biol.	JUN	2023	10.1016/j.redox.2023.102690	Biochemistry & Molecular Biology	Biochemistry & Molecular Biology
scRNA-seq	Alzheimer’s disease	mice	peripheral blood	PRJNA714499 https://doi.org/10.6084/m9.figshare.19706530.v1	Dhandapani, R; Neri, M; Bernhard, M; Brzak, I; Schweizer, T; Rudin, S; Joller, S; Berth, R; Kernen, J; Neuhaus, A; Waldt, A; Cuttat, R; Naumann, U; Keller, CG; Roma, G; Feuerbach, D; Shimshek, DR; Neumann, U; Gasparini, F; Galimberti, I	Dhandapani, Rahul; Neri, Marilisa; Bernhard, Mario; Brzak, Irena; Schweizer, Tatjana; Rudin, Stefan; Joller, Stefanie; Berth, Ramon; Kernen, Jasmin; Neuhaus, Anna; Waldt, Annick; Cuttat, Rachel; Naumann, Ulrike; Keller, Caroline Gubser; Roma, Guglielmo; Feuerbach, Dominik; Shimshek, Derya R.; Neumann, Ulf; Gasparini, Fabrizio; Galimberti, Ivan	Sustained Trem2 stabilization accelerates microglia heterogeneity and Af3 pathology in a mouse model of Alzheimer's disease	CELL REPORTS		ALPHA-CONVERTING-ENZYME; CEREBROSPINAL-FLUID; MULTIPLE-SCLEROSIS; SOLUBLE TREM-2; CLEAVAGE SITE; NEUROINFLAMMATION; DEGENERATION; ACTIVATION; DEPOSITION; RESPONSES	Novartis; Novartis; Roche Holding; GlaxoSmithKline	25	Cell Reports	MAY 31	2022	10.1016/j.celrep.2022.110883	Cell Biology	Cell Biology
scRNA-seq	Parkinson’s disease	human	peripheral blood	GSE194245	Wang, PP; Luo, M; Zhou, WY; Jin, XY; Xu, ZC; Yan, S; Li, YQ; Xu, C; Cheng, R; Huang, Y; Lin, XY; Yao, LF; Nie, H; Jiang, QH	Wang, Pingping; Luo, Meng; Zhou, Wenyang; Jin, Xiyun; Xu, Zhaochun; Yan, Shi; Li, Yiqun; Xu, Chang; Cheng, Rui; Huang, Yan; Lin, Xiaoyu; Yao, Lifen; Nie, Huan; Jiang, Qinghua	Global Characterization of Peripheral B Cells in Parkinson's Disease by Single-Cell RNA and BCR Sequencing	FRONTIERS IN IMMUNOLOGY	Parkinson's disease; B cells; scRNA-seq; scBCR-seq; adaptive immune response	TUMOR-NECROSIS-FACTOR; T-CELLS; MOUSE MODEL; ALPHA; LYMPHOCYTES; AGE; NEURODEGENERATION; DIFFERENTIATION; CONTRIBUTES; EXPRESSION	Harbin Institute of Technology; Harbin Medical University; Harbin Institute of Technology	25	Front. Immunol.	FEB 16	2022	10.3389/fimmu.2022.814239	Immunology	Immunology
scRNA-seq	Alzheimer’s disease	mice	postmortem brain	GSE159866, GSE175389	Karahan, H; Smith, DC; Kim, B; Dabin, LC; Al-Amin, MM; Wijeratne, HRS; Pennington, T; di Prisco, GV; McCord, B; Lin, PBC; Li, YX; Peng, JM; Oblak, AL; Chu, SY; Atwood, BK; Kim, JS	Karahan, Hande; Smith, Daniel C.; Kim, Byungwook; Dabin, Luke C.; Al-Amin, Md Mamun; Wijeratne, H. R. Sagara; Pennington, Taylor; di Prisco, Gonzalo Viana; McCord, Brianne; Lin, Peter Bor-chian; Li, Yuxin; Peng, Junmin; Oblak, Adrian L.; Chu, Shaoyou; Atwood, Brady K.; Kim, Jungsu	Deletion of Abi3 gene locus exacerbates neuropathological features of Alzheimer's disease in a mouse model of Aβ amyloidosis	SCIENCE ADVANCES		MICROGLIAL RESPONSE; PLAQUE DEPOSITION; TREM2; EXPRESSION; PROTEIN; BRAIN; RNA; PHAGOCYTOSIS; ACTIVATION; ASTROCYTES	Indiana University System; Indiana University Bloomington; Indiana University System; Indiana University Bloomington; Indiana University System; Indiana University Bloomington; Indiana University System; Indiana University Bloomington; Indiana University System; Indiana University Bloomington; St Jude Children's Research Hospital; St Jude Children's Research Hospital; St Jude Children's Research …	25	Sci. Adv.	NOV	2021	10.1126/sciadv.abe3954	Multidisciplinary Sciences	Science & Technology - Other Topics
scRNA-seq	Alzheimer’s disease	mice	postmortem brain	undisclosed	Deng, MF; Zhang, QP; Wu, ZZ; Ma, T; He, AD; Zhang, TM; Ke, X; Yu, QT; Han, YY; Lu, YM	Deng, Manfei; Zhang, Qingping; Wu, Zhuoze; Ma, Tian; He, Aodi; Zhang, Tongmei; Ke, Xiao; Yu, Quntao; Han, Yunyun; Lu, Youming	Mossy cell synaptic dysfunction causes memory imprecision via miR-128 inhibition of STIM2 in Alzheimer's disease mouse model	AGING CELL	Alzheimer's disease; memory imprecision; MiR-128; mossy cell; synaptic dysfunction	FREQUENCY ACTIVITY; GRANULE CELLS; A-BETA; HIPPOCAMPUS; DEFICITS; CA3	Huazhong University of Science & Technology; Huazhong University of Science & Technology; Huazhong University of Science & Technology; Huazhong University of Science & Technology; Huazhong University of Science & Technology	24	Aging Cell	MAY	2020	10.1111/acel.13144	Cell Biology; Geriatrics & Gerontology	Cell Biology; Geriatrics & Gerontology
scRNA-seq	multiple sclerosis	human	human iPSCs	undisclosed	Namchaiw, P; Wen, H; Mayrhofer, F; Chechneva, O; Biswas, S; Deng, WB	Namchaiw, Poommaree; Wen, Han; Mayrhofer, Florian; Chechneva, Olga; Biswas, Sangita; Deng, Wenbin	Temporal and partial inhibition of GLI1 in neural stem cells (NSCs) results in the early maturation of NSC derived oligodendrocytes in vitro	STEM CELL RESEARCH & THERAPY	Oligodendrocyte; GANT61; Myelination; NSC; Sonic Hedgehog; SHH; OPC; RNA-Seq; Differentiation; GLI1; hiPSC; hESC; Small molecule	SONIC-HEDGEHOG; EFFICIENT GENERATION; PROGENITOR CELLS; ARP2/3 COMPLEX; MYELIN; LINEAGE; DIFFERENTIATION; EXPRESSION; MIGRATION; NEURONS	University of California System; University of California Davis; Chinese Academy of Medical Sciences - Peking Union Medical College; Institute of Medicinal Plant Development - CAMS; Chinese Academy of Medical Sciences - Peking Union Medical College; Peking Union Medical College	24	Stem Cell Res. Ther.	AUG 27	2019	10.1186/s13287-019-1374-y	Cell & Tissue Engineering; Cell Biology; Medicine, Research & Experimental	Cell Biology; Research & Experimental Medicine
scRNA-seq	Alzheimer’s disease	mice	hippocampus	GSE150934	Choi, H; Choi, Y; Lee, EJ; Kim, H; Lee, Y; Kwon, S; Hwang, DW; Lee, DS	Choi, Hongyoon; Choi, Yoori; Lee, Eun Ji; Kim, Hyun; Lee, Youngsun; Kwon, Seokjun; Hwang, Do Won; Lee, Dong Soo	Hippocampal glucose uptake as a surrogate of metabolic change of microglia in Alzheimer's disease	JOURNAL OF NEUROINFLAMMATION	Alzheimer's disease; Microglia; Positron emission tomography; Hippocampus; Single-cell RNA-sequencing	AMYLOID DEPOSITION; TREM2; PET; HYPERMETABOLISM; HYPOMETABOLISM; ACTIVATION; BIOMARKER; DEMENTIA; PATTERNS	Seoul National University (SNU); Seoul National University Hospital; Seoul National University (SNU); Seoul National University (SNU)	24	J. Neuroinflamm.	AUG 31	2021	10.1186/s12974-021-02244-6	Immunology; Neurosciences	Immunology; Neurosciences & Neurology
scRNA-seq	multiple sclerosis	human	lymph nodes and blood		Theil, D; Smith, P; Huck, C; Gilbart, Y; Kakarieka, A; Leppert, D; Rauld, C; Schmid, C; Baumgartner, R; Stuber, N; Cordoba, F; Dubost, V; Darribat, K; Jivkov, M; Frieauff, W; Kneuer, R; Stoeckli, M; Reinker, S; Mansfield, K; Carballido, JM; Couttet, P; Weckbecker, G	Theil, Diethilde; Smith, Paul; Huck, Catherine; Gilbart, Yoann; Kakarieka, Algirdas; Leppert, David; Rauld, Celine; Schmid, Cindy; Baumgartner, Reto; Stuber, Nathalie; Cordoba, Francisco; Dubost, Valerie; Darribat, Katy; Jivkov, Magali; Frieauff, Wilfried; Kneuer, Rainer; Stoeckli, Markus; Reinker, Stefan; Mansfield, Keith; Carballido, Jose M.; Couttet, Philippe; Weckbecker, Gisbert	Imaging Mass Cytometry and Single-Cell Genomics Reveal Differential Depletion and Repletion of B-Cell Populations Following Ofatumumab Treatment in Cynomolgus Monkeys	FRONTIERS IN IMMUNOLOGY	B-cell depletion; flow cytometry; lymph nodes; ofatumumab; single-cell genomics; t-SNE; cynomolgus monkeys	REMITTING MULTIPLE-SCLEROSIS; ANTIBODY; RITUXIMAB; OCRELIZUMAB; DEFICIENCY; ANTAGONIST; EFFICACY; SAFETY; TISSUE; BLOOD	Novartis; University of Basel	24	Front. Immunol.	JUN 20	2019	10.3389/fimmu.2019.01340	Immunology	Immunology
scRNA-seq	multiple sclerosis	Macaca fascicularis	lymph nodes and blood	undisclosed	Lodder, C; Scheyltjens, I; Stancu, IC; Lucena, PB; de Ravé, MG; Vanherle, S; Vanmierlo, T; Cremers, N; Vanrusselt, H; Brône, B; Hanseeuw, B; Octave, JN; Bottelbergs, A; Movahedi, K; Dewachter, I	Lodder, Chritica; Scheyltjens, Isabelle; Stancu, Ilie Cosmin; Botella Lucena, Pablo; Gutierrez de Rave, Manuel; Vanherle, Sarah; Vanmierlo, Tim; Cremers, Niels; Vanrusselt, Hannah; Brone, Bert; Hanseeuw, Bernard; Octave, Jean-Noel; Bottelbergs, Astrid; Movahedi, Kiavash; Dewachter, Ilse	CSF1R inhibition rescues tau pathology and neurodegeneration in an A/T/N model with combined AD pathologies, while preserving plaque associated microglia	ACTA NEUROPATHOLOGICA COMMUNICATIONS	Alzheimer's disease; Amyloid pathology; Tau pathology; Neurodegeneration; ATN-continuum; Microgliosis; Microglial profiling; CSF1R inhibition	ALZHEIMERS-DISEASE; TRANSGENIC MICE; MOUSE MODEL; NEURONAL LOSS; BETA; IMPAIRS; BRAIN; CELL; NEUROINFLAMMATION; DEPOSITION	Hasselt University; Flanders Institute for Biotechnology (VIB); Vrije Universiteit Brussel; Universite Catholique Louvain; Universite Catholique Louvain; Cliniques Universitaires Saint-Luc; Harvard University; Massachusetts General Hospital; Harvard Medical School; Johnson & Johnson; Janssen Pharmaceuticals; Vrije Universiteit Brussel	23	Acta Neuropathol. Commun.	JUN 8	2021	10.1186/s40478-021-01204-8	Neurosciences	Neurosciences & Neurology
scRNA-seq	Alzheimer’s disease	human	human iPSCs	GSE239509	Jorfi, M; Park, J; Hall, CK; Lin, CCJ; Chen, M; von Maydell, D; Kruskop, JM; Kang, B; Choi, Y; Prokopenko, D; Irimia, D; Kim, DY; Tanzi, RE	Jorfi, Mehdi; Park, Joseph; Hall, Clare K.; Lin, Chih-Chung Jerry; Chen, Meng; von Maydell, Djuna; Kruskop, Jane M.; Kang, Byunghoon; Choi, Younjung; Prokopenko, Dmitry; Irimia, Daniel; Kim, Doo Yeon; Tanzi, Rudolph E.	Infiltrating CD8+ T cells exacerbate Alzheimer's disease pathology in a 3D human neuroimmune axis model	NATURE NEUROSCIENCE		CHEMOKINE RECEPTOR CXCR3; MOUSE MODEL; BRAIN; EXPRESSION; ACTIVATION; BETA; MICROGLIA; SYSTEM; IP-10	Harvard University; Massachusetts General Hospital; Harvard University; Harvard Medical School; Harvard University; Massachusetts General Hospital	21	Nat. Neurosci.	AUG 24	2023	10.1038/s41593-023-01415-3	Neurosciences	Neurosciences & Neurology
scRNA-seq	Parkinson’s disease	mice	substantia nigra, striatum	https://doi.org/10.5281/zenodo.6377704	Abdel-Haq, R; Schlachetzki, JCM; Boktor, JC; Cantu-Jungles, TM; Thron, T; Zhang, MY; Bostick, JW; Khazaei, T; Chilakala, S; Morais, LH; Humphrey, G; Keshavarzian, A; Katz, JE; Thomson, M; Knight, R; Gradinaru, V; Hamaker, BR; Glass, CK; Mazmanian, SK	Abdel-Haq, Reem; Schlachetzki, Johannes C. M.; Boktor, Joseph C.; Cantu-Jungles, Thaisa M.; Thron, Taren; Zhang, Mengying; Bostick, John W.; Khazaei, Tahmineh; Chilakala, Sujatha; Morais, Livia H.; Humphrey, Greg; Keshavarzian, Ali; Katz, Jonathan E.; Thomson, Matthew; Knight, Rob; Gradinaru, Viviana; Hamaker, Bruce R.; Glass, Christopher K.; Mazmanian, Sarkis K.	A prebiotic diet modulates microglial states and motor deficits in α-synuclein overexpressing mice	ELIFE	parkinson's disease; diet; microglia; microbiome; Mouse	CHAIN FATTY-ACIDS; PARKINSONS-DISEASE; GUT MICROBIOTA; INFLAMMATION; ACTIVATION; VAGOTOMY; FEATURES; PATTERN; GROWTH; MODEL	California Institute of Technology; University of California System; University of California San Diego; Purdue University System; Purdue University; University of Southern California; University of California System; University of California San Diego; Rush University; Rush University; University of California System; University of California San Diego; University of California System; Universit…	21	eLife	NOV 8	2022	10.7554/eLife.81453	Biology	Life Sciences & Biomedicine - Other Topics
scRNA-seq	multiple sclerosis	human	cerebral spinal fluid, blood, bone marrow	undisclosed	Zhang, C; Zhang, TX; Liu, Y; Jia, DM; Zeng, P; Du, C; Yuan, M; Liu, Q; Wang, YJ; Shi, FD	Zhang, Chao; Zhang, Tian-Xiang; Liu, Ye; Jia, Dongmei; Zeng, Pei; Du, Chen; Yuan, Meng; Liu, Qiang; Wang, Yongjun; Shi, Fu-Dong	B-Cell Compartmental Features and Molecular Basis for Therapy in Autoimmune Disease	NEUROLOGY-NEUROIMMUNOLOGY & NEUROINFLAMMATION		OPTICA SPECTRUM DISORDERS; NEUROMYELITIS-OPTICA; DIAGNOSTIC-CRITERIA; MULTIPLE-SCLEROSIS; RITUXIMAB; EFFICACY; SAFETY; MULTICENTER; LUPUS	Capital Medical University; Tianjin Medical University	21	Neurol.-Neuroimmunol. Neuroinflammation	NOV	2021	10.1212/NXI.0000000000001070	Clinical Neurology; Neurosciences	Neurosciences & Neurology
scRNA-seq	Alzheimer’s disease	mice	postmortem brain	GSE199346	Niu, MC; Cao, WJ; Wang, YC; Zhu, QY; Luo, JY; Wang, BP; Zheng, H; Weitz, DA; Zong, CH	Niu, Muchun; Cao, Wenjian; Wang, Yongcheng; Zhu, Qiangyuan; Luo, Jiayi; Wang, Baiping; Zheng, Hui; Weitz, David A.; Zong, Chenghang	Droplet-based transcriptome profiling of individual synapses	NATURE BIOTECHNOLOGY		RNA-SEQ; SINGLE; DIVERSITY; NEURONS; NUMBER; STATE	Baylor College of Medicine; Baylor College of Medicine; Baylor College of Medicine; Harvard University; Harvard University; Baylor College of Medicine; Baylor College of Medicine; Harvard University; Harvard University; Baylor College of Medicine; Baylor College of Medicine; Zhejiang University	20	Nat. Biotechnol.	SEP	2023	10.1038/s41587-022-01635-1	Biotechnology & Applied Microbiology	Biotechnology & Applied Microbiology
scRNA-seq	neuroinflammation	mice	postmortem brain	GSM6680914, GSM6680915, GSM6680916, GSM6680917	Schwab, N; Taskina, D; Leung, E; Innes, BT; Bader, GD; Hazrati, LN	Schwab, Nicole; Taskina, Daria; Leung, Emily; Innes, Brendan T.; Bader, Gary D.; Hazrati, Lili-Naz	Neurons and glial cells acquire a senescent signature after repeated mild traumatic brain injury in a sex-dependent manner	FRONTIERS IN NEUROSCIENCE	mild traumatic brain injury; cellular senescence; senolytic; concussion; sex difference	CELLULAR SENESCENCE; HYPEREXCITABILITY; PROGESTERONE; CONTRIBUTES; MICROGLIA; TARGET; CGAS; AXIS	University of Toronto; University of Toronto; Hospital for Sick Children (SickKids); University of Toronto; University of Toronto	20	Front. Neurosci.	NOV 3	2022	10.3389/fnins.2022.1027116	Neurosciences	Neurosciences & Neurology
scRNA-seq	neuroinflammation	mice	forebrain	GSE212199	Rosen, SF; Soung, AL; Yang, W; Ai, SJ; Kanmogne, M; Davé, VA; Artyomov, M; Magee, JA; Klein, RS	Rosen, Sarah F.; Soung, Allison L.; Yang, Wei; Ai, Shenjian; Kanmogne, Marlene; Dave, Veronica A.; Artyomov, Maxim; Magee, Jeffrey A.; Klein, Robyn S.	Single-cell RNA transcriptome analysis of CNS immune cells reveals CXCL16/CXCR6 as maintenance factors for tissue-resident T cells that drive synapse elimination	GENOME MEDICINE		WEST-NILE-VIRUS; TRANSMEMBRANE CXC-CHEMOKINE; CENTRAL-NERVOUS-SYSTEM; TNF-ALPHA; RECEPTOR; EXPRESSION; MICROGLIA; BRAIN; RECRUITMENT; ASTROCYTES	Washington University (WUSTL); Washington University (WUSTL); Washington University (WUSTL); Washington University (WUSTL); Washington University (WUSTL); Washington University (WUSTL)	20	Genome Med.	SEP 24	2022	10.1186/s13073-022-01111-0	Genetics & Heredity	Genetics & Heredity
scRNA-seq	Parkinson’s disease	human	human iPSCs	GSE176160	Schmidt, S; Luecken, MD; Trümbach, D; Hembach, S; Niedermeier, KM; Wenck, N; Pflügler, K; Stautner, C; Böttcher, A; Lickert, H; Ramirez-Suastegui, C; Ahmad, R; Ziller, MJ; Fitzgerald, JC; Ruf, V; van de Berg, WDJ; Jonker, AJ; Gasser, T; Winner, B; Winkler, J; Weisenhorn, DMV; Giesert, F; Theis, FJ; Wurst, W	Schmidt, Sebastian; Luecken, Malte D.; Truembach, Dietrich; Hembach, Sina; Niedermeier, Kristina M.; Wenck, Nicole; Pfluegler, Klaus; Stautner, Constantin; Boettcher, Anika; Lickert, Heiko; Ramirez-Suastegui, Ciro; Ahmad, Ruhel; Ziller, Michael J.; Fitzgerald, Julia C.; Ruf, Viktoria; van de Berg, Wilma D. J.; Jonker, Allert J.; Gasser, Thomas; Winner, Beate; Winkler, Juergen; Weisenhorn, Daniela…	Primary cilia and SHH signaling impairments in human and mouse models of Parkinson's disease	NATURE COMMUNICATIONS		ENRICHMENT ANALYSIS; GLI PROTEINS; R-PACKAGE; PINK1; DYSFUNCTION; NEURONS; PHOSPHORYLATION; PROGRESSION; PLATFORM; LENGTH	Helmholtz Association; Helmholtz-Center Munich - German Research Center for Environmental Health; Technical University of Munich; Helmholtz Association; Helmholtz-Center Munich - German Research Center for Environmental Health; Helmholtz Association; Helmholtz-Center Munich - German Research Center for Environmental Health; Helmholtz Association; Helmholtz-Center Munich - German Research Center f…	19	Nat. Commun.	AUG 16	2022	10.1038/s41467-022-32229-9	Multidisciplinary Sciences	Science & Technology - Other Topics
scRNA-seq	Alzheimer’s disease	human	olfactory mucosa	EGAS00001006019	Lampinen, R; Fazaludeen, MF; Avesani, S; Örd, T; Penttilä, E; Lehtola, JM; Saari, T; Hannonen, S; Saveleva, L; Kaartinen, E; Acosta, FF; Cruz-Haces, M; Löppönen, H; Mackay-Sim, A; Kaikkonen, MU; Koivisto, AM; Malm, T; White, AR; Giugno, R; Chew, S; Kanninen, KM	Lampinen, Riikka; Fazaludeen, Mohammad Feroze; Avesani, Simone; Ord, Tiit; Penttila, Elina; Lehtola, Juha-Matti; Saari, Toni; Hannonen, Sanna; Saveleva, Liudmila; Kaartinen, Emma; Fernandez Acosta, Francisco; Cruz-Haces, Marcela; Lopponen, Heikki; Mackay-Sim, Alan; Kaikkonen, Minna U.; Koivisto, Anne M.; Malm, Tarja; White, Anthony R.; Giugno, Rosalba; Chew, Sweelin; Kanninen, Katja M.	Single-Cell RNA-Seq Analysis of Olfactory Mucosal Cells of Alzheimer's Disease Patients	CELLS	Alzheimer's disease; olfactory mucosa; amyloid beta; single-cell RNA-sequencing; mitochondria	BETA; EXPRESSION; BRAIN; TAU; NEUROGENESIS; DYSFUNCTION; CONSORTIUM; EPITHELIUM; ESTABLISH; REGISTRY	University of Eastern Finland; University of Verona; Kuopio University Hospital; University of Eastern Finland; University of Eastern Finland; University of Eastern Finland; Kuopio University Hospital; Griffith University; University of Helsinki; Helsinki University Central Hospital; University of Helsinki; QIMR Berghofer Medical Research Institute	19	Cells	FEB	2022	10.3390/cells11040676	Cell Biology	Cell Biology
scRNA-seq	multiple sclerosis	human	peripheral blood	GSE233917	Seyedsadr, M; Wang, Y; Elzoheiry, M; Gopal, SS; Jang, S; Duran, G; Chervoneva, I; Kasimoglou, E; Wrobel, JA; Hwang, D; Garifallou, J; Zhang, X; Khan, TH; Lorenz, U; Su, MR; Ting, JP; Broux, B; Rostami, A; Miskin, D; Markovic-Plese, S	Seyedsadr, Maryamsadat; Wang, Yan; Elzoheiry, Manal; Gopal, Sowmya Shree; Jang, Soohwa; Duran, Gayel; Chervoneva, Inna; Kasimoglou, Ezgi; Wrobel, John A.; Hwang, Daniel; Garifallou, James; Zhang, Xin; Khan, Tabish H.; Lorenz, Ulrike; Su, Maureen; Ting, Jenny P.; Broux, Bieke; Rostami, Abdolmohamad; Miskin, Dhanashri; Markovic-Plese, Silva	IL-11 induces NLRP3 inflammasome activation in monocytes and inflammatory cell migration to the central nervous system	PROCEEDINGS OF THE NATIONAL ACADEMY OF SCIENCES OF THE UNITED STATES OF AMERICA	multiple sclerosis; IL-11; NLRP3 inflammasome; EAE; monocyte	MULTIPLE-SCLEROSIS; INTERLEUKIN-11; EXPRESSION; RESPONSES; DISEASE; CNS	Jefferson University; University of California System; University of California Los Angeles; Hasselt University; Jefferson University; University of North Carolina; University of North Carolina Chapel Hill; University of Pennsylvania; Pennsylvania Medicine; Childrens Hospital of Philadelphia; Duke University; Washington University (WUSTL)	18	Proc. Natl. Acad. Sci. U. S. A.	JUN 20	2023	10.1073/pnas.2221007120	Multidisciplinary Sciences	Science & Technology - Other Topics
scRNA-seq	Alzheimer’s disease	mice	hippocampi, cortices	GSE175546	Kim, DW; Tu, KJ; Wei, ALC; Lau, AJ; Gonzalez-Gil, A; Cao, TY; Braunstein, K; Ling, JP; Troncoso, JC; Wong, PC; Blackshaw, S; Schnaar, RL; Li, T	Kim, Dong Won; Tu, Kevin J. J.; Wei, Alice; Lau, Ashley J. J.; Gonzalez-Gil, Anabel; Cao, Tianyu; Braunstein, Kerstin; Ling, Jonathan P. P.; Troncoso, Juan C. C.; Wong, Philip C. C.; Blackshaw, Seth; Schnaar, Ronald L. L.; Li, Tong	Amyloid-beta and tau pathologies act synergistically to induce novel disease stage-specific microglia subtypes	MOLECULAR NEURODEGENERATION	Amyloid-beta (A beta); Tau; Microglia; Alzheimer's disease (AD); Sialic acid-binding immunoglobulin-type lectin (Siglec)	ALZHEIMERS-DISEASE; SIGLEC-F; COMMON VARIANTS; MESSENGER-RNA; ACTIVATION; EXPRESSION; CD33; NEURODEGENERATION; TRANSCRIPTOMICS; ASSOCIATION	Johns Hopkins University; Johns Hopkins University; Johns Hopkins University	18	Mol. Neurodegener.	DEC 17	2022	10.1186/s13024-022-00589-x	Neurosciences	Neurosciences & Neurology
scRNA-seq	Alzheimer’s disease	mice	postmortem brain	GSE178226	Hu, M; Zhu, DX; Zhang, J; Gao, F; Hashem, J; Kingsley, P; Marnett, LJ; Mackie, K; Chen, C	Hu, Mei; Zhu, Dexiao; Zhang, Jian; Gao, Fei; Hashem, Jack; Kingsley, Philip; Marnett, Lawrence J.; Mackie, Ken; Chen, Chu	Enhancing endocannabinoid signalling in astrocytes promotes recovery from traumatic brain injury	BRAIN	2-arachidonoylglycerol; monoacylglycerol lipase; peroxisome proliferator-activated receptor-gamma; neurodegeneration; Alzheimer's disease	MONOACYLGLYCEROL LIPASE; MOUSE MODEL; INHIBITION; METABOLISM; TARGET; 2-AG; 2-ARACHIDONOYLGLYCEROL; NEUROINFLAMMATION; NEUROPATHOLOGY; PROSTAGLANDINS	University of Texas System; University of Texas Health Science Center at San Antonio; Vanderbilt University; Indiana University System; Indiana University Bloomington	19	Brain	MAR 29	2022	10.1093/brain.awab310	Clinical Neurology; Neurosciences	Neurosciences & Neurology
scRNA-seq	Parkinson’s disease	human	human iPSCs	GSE128040	Walter, J; Bolognin, S; Poovathingal, SK; Magni, S; Gérard, D; Antony, PMA; Nickels, SL; Salamanca, L; Berger, E; Smits, LM; Grzyb, K; Perfeito, R; Hoel, F; Qing, XB; Ohnmacht, J; Bertacchi, M; Jarazo, J; Ignac, T; Monzel, AS; Gonzalez-Cano, L; Krüger, R; Sauter, T; Studer, M; de Almeida, LP; Tronstad, KJ; Sinkkonen, L; Skupin, A; Schwamborn, JC	Walter, Jonas; Bolognin, Silvia; Poovathingal, Suresh K.; Magni, Stefano; Gerard, Deborah; Antony, Paul M. A.; Nickels, Sarah L.; Salamanca, Luis; Berger, Emanuel; Smits, Lisa M.; Grzyb, Kamil; Perfeito, Rita; Hoel, Fredrik; Qing, Xiaobing; Ohnmacht, Jochen; Bertacchi, Michele; Jarazo, Javier; Ignac, Tomasz; Monzel, Anna S.; Gonzalez-Cano, Laura; Krueger, Rejko; Sauter, Thomas; Studer, Michele; d…	The Parkinson's-disease-associated mutation LRRK2-G2019S alters dopaminergic differentiation dynamics via NR2F1	CELL REPORTS		NEURAL STEM-CELLS; COUP-TFI; OLFACTORY-BULB; LRRK2 MUTATION; OPTIC ATROPHY; GRANULE CELLS; IDENTIFICATION; SPECIFICATION; NEUROGENESIS; EXPRESSION	University of Luxembourg; University of Luxembourg; Universidade de Coimbra; University of Bergen; Institut National de la Sante et de la Recherche Medicale (Inserm); Centre National de la Recherche Scientifique (CNRS); Universite Cote d'Azur; Luxembourg Institute of Health; Luxembourg Hospital Center; Universidade de Coimbra; University of California System; University of California San Diego; F…	18	Cell Reports	OCT 19	2021	10.1016/j.celrep.2021.109864	Cell Biology	Cell Biology
scRNA-seq	Alzheimer’s disease	mice	ovaries	GSE142163	Liu, LL; Wang, HS; Xu, GL; Liu, L	Liu, Linlin; Wang, Huasong; Xu, Guo Liang; Liu, Lin	Tet1 Deficiency Leads to Premature Ovarian Failure	FRONTIERS IN CELL AND DEVELOPMENTAL BIOLOGY	Tet1; aging; epigenetics; oocyte; premature ovarian failure	ACTIVE DNA DEMETHYLATION; COGNITIVE IMPAIRMENT; STEM-CELLS; GERM-CELL; RNA-SEQ; AGE; 5-HYDROXYMETHYLCYTOSINE; ABNORMALITIES; REACTIVATION; PREMUTATION	Nankai University; Nankai University; Chinese Academy of Sciences; Center for Excellence in Molecular Cell Science, CAS; Fudan University	18	Front. Cell. Dev. Biol.	MAR 23	2021	10.3389/fcell.2021.644135	Cell Biology; Developmental Biology	Cell Biology; Developmental Biology
scRNA-seq	Amyotrophic lateral sclerosis	mice	spinal cord meninges	GSE160193	Cohen, M; Giladi, A; Raposo, C; Zada, M; Li, BG; Ruckh, J; Deczkowska, A; Mohar, B; Shechter, R; Lichtenstein, RG; Amit, I; Schwartz, M	Cohen, Merav; Giladi, Amir; Raposo, Catarina; Zada, Mor; Li, Baoguo; Ruckh, Julia; Deczkowska, Aleksandra; Mohar, Boaz; Shechter, Ravid; Lichtenstein, Rachel G.; Amit, Ido; Schwartz, Michal	Meningeal lymphoid structures are activated under acute and chronic spinal cord pathologies	LIFE SCIENCE ALLIANCE		BRAINS CHOROID-PLEXUS; REGULATORY T-CELLS; IN-VIVO; B-CELLS; IMMUNE SURVEILLANCE; LYMPHATIC DRAINAGE; ECTOPIC EXPRESSION; ENDOTHELIAL-CELLS; GERMINAL CENTER; MOUSE MODEL	Weizmann Institute of Science; Weizmann Institute of Science; Ben Gurion University; Harvard University; Massachusetts Institute of Technology (MIT); Broad Institute	18	Life Sci. Alliance	JAN	2021	10.26508/lsa.202000907	Biology	Life Sciences & Biomedicine - Other Topics
scRNA-seq	neuroinflammation	mice	meninges	GSE217314, GSE161290	Rustenhoven, J; Pavlou, G; Storck, SE; Dykstra, T; Du, SL; Wan, ZP; Quintero, D; Scallan, JP; Smirnov, I; Kamm, RD; Kipnis, J	Rustenhoven, Justin; Pavlou, Georgios; Storck, Steffen E.; Dykstra, Taitea; Du, Siling; Wan, Zhengpeng; Quintero, Daniel; Scallan, Joshua P.; Smirnov, Igor; Kamm, Roger D.; Kipnis, Jonathan	Age-related alterations in meningeal immunity drive impaired CNS lymphatic drainage	JOURNAL OF EXPERIMENTAL MEDICINE		SYSTEM; CADHERIN; PACKAGE	Washington University (WUSTL); Washington University (WUSTL); University of Auckland; University of Auckland; Massachusetts Institute of Technology (MIT); Washington University (WUSTL); State University System of Florida; University of South Florida; Massachusetts Institute of Technology (MIT)	17	J. Exp. Med.	APR 7	2023	10.1084/jem.20221929	Immunology; Medicine, Research & Experimental	Immunology; Research & Experimental Medicine
snRNA-seq;snATAC-seq	Parkinson’s disease	human	postmortem brain	GSE148434	Lee, AJ; Kim, C; Park, S; Joo, J; Choi, B; Yang, D; Jun, K; Eom, J; Lee, SJ; Chung, SJ; Rissman, RA; Chung, J; Masliah, E; Jung, I	Lee, Andrew J.; Kim, Changyoun; Park, Seongwan; Joo, Jaegeon; Choi, Baekgyu; Yang, Dongchan; Jun, Kyoungho; Eom, Junghyun; Lee, Seung-Jae; Chung, Sun Ju; Rissman, Robert A.; Chung, Jongkyeong; Masliah, Eliezer; Jung, Inkyung	Characterization of altered molecular mechanisms in Parkinson?s disease through cell type-resolved multiomics analyses	SCIENCE ADVANCES		GENOME-WIDE ASSOCIATION; DIFFERENTIAL EXPRESSION ANALYSIS; RISK LOCI; METAANALYSIS; GENE; PRINCIPLES; PACKAGE	Korea Advanced Institute of Science & Technology (KAIST); National Institutes of Health (NIH) - USA; NIH National Institute on Aging (NIA); Seoul National University (SNU); Seoul National University (SNU); Seoul National University (SNU); University of Ulsan; Asan Medical Center; University of California System; University of California San Diego	16	Sci. Adv.	APR 14	2023	10.1126/sciadv.abo2467	Multidisciplinary Sciences	Science & Technology - Other Topics
scRNA-seq	Alzheimer’s disease	mice	hippocampus	GSE224398	Park, H; Cho, B; Kim, H; Saito, T; Saido, TC; Won, KJ; Kim, J	Park, Hanseul; Cho, Byounggook; Kim, Hongwon; Saito, Takashi; Saido, Takaomi C.; Won, Kyoung-Jae; Kim, Jongpil	Single-cell RNA-sequencing identifies disease-associated oligodendrocytes in male APP NL-G-F and 5XFAD mice	NATURE COMMUNICATIONS		TRANSGENIC MICE; MOUSE MODELS; ALZHEIMERS; MYELIN; GENE; AMYLOIDOSIS; MICROGLIA	Dongguk University; RIKEN; Nagoya City University; Cedars Sinai Medical Center	15	Nat. Commun.	FEB 13	2023	10.1038/s41467-023-36519-8	Multidisciplinary Sciences	Science & Technology - Other Topics
scRNA-seq	Parkinson’s disease	human	human iPSCs	GSE213569, PXD035500	Virdi, GS; Choi, ML; Evans, JR; Yao, Z; Athauda, D; Strohbuecker, S; Nirujogi, RS; Wernick, AI; Pelegrina-Hidalgo, N; Leighton, C; Saleeb, RS; Kopach, O; Alrashidi, H; Melandri, D; Perez-Lloret, J; Angelova, PR; Sylantyev, S; Eaton, S; Heales, S; Rusakov, DA; Alessi, DR; Kunath, T; Horrocks, MH; Abramov, AY; Patani, R; Gandhi, S	Virdi, Gurvir S.; Choi, Minee L.; Evans, James R.; Yao, Zhi; Athauda, Dilan; Strohbuecker, Stephanie; Nirujogi, Raja S.; Wernick, Anna, I; Pelegrina-Hidalgo, Noelia; Leighton, Craig; Saleeb, Rebecca S.; Kopach, Olga; Alrashidi, Haya; Melandri, Daniela; Perez-Lloret, Jimena; Angelova, Plamena R.; Sylantyev, Sergiy; Eaton, Simon; Heales, Simon; Rusakov, Dmitri A.; Alessi, Dario R.; Kunath, Tilo; Ho…	Protein aggregation and calcium dysregulation are hallmarks of familial Parkinson's disease in midbrain dopaminergic neurons	NPJ PARKINSONS DISEASE		ALPHA-SYNUCLEIN; COMPREHENSIVE ANALYSIS; COMPLEX I; HUMAN ES; PROGENITORS; STRESS; CELLS; DYSFUNCTION; PACEMAKING; GENERATION	Francis Crick Institute; University of London; University College London; University of Dundee; University of Edinburgh; University of Edinburgh; University of London; University College London; University of London; University College London; University of London; University College London; University of Aberdeen; University of London; University College London	15	npj Parkinsons Dis.	NOV 24	2022	10.1038/s41531-022-00423-7	Neurosciences	Neurosciences & Neurology
scRNA-seq	Alzheimer’s disease	human	human iPSCs	GSE186356	Rickner, HD; Jiang, LL; Hong, R; O'Neill, NK; Mojica, CA; Snyder, BJ; Zhang, LS; Shaw, D; Medalla, M; Wolozin, B; Cheng, CS	Rickner, Hannah Drew; Jiang, Lulu; Hong, Rui; O'Neill, Nicholas K.; Mojica, Chromewell A.; Snyder, Benjamin J.; Zhang, Lushuang; Shaw, Dipan; Medalla, Maria; Wolozin, Benjamin; Cheng, Christine S.	Single cell transcriptomic profiling of a neuron-astrocyte assembloid tauopathy model	NATURE COMMUNICATIONS		FAMILIAL ALZHEIMERS-DISEASE; TAU-MEDIATED NEURODEGENERATION; HEAT-SHOCK PROTEINS; ENRICHMENT ANALYSIS; CULTURE MODEL; PATHOLOGY; PROPAGATION; EXPRESSION; DEMENTIA; MUTATION	Boston University; Boston University; Boston University; Boston University; J. Craig Venter Institute; Boston University; Boston University; University of California System; University of California San Diego	15	Nat. Commun.	OCT 21	2022	10.1038/s41467-022-34005-1	Multidisciplinary Sciences	Science & Technology - Other Topics
scRNA-seq	multiple sclerosis	mice	spinal cord, postmortem brain	GSE204828, DRA014178	Matsudaira, T; Nakano, S; Konishi, Y; Kawamoto, S; Uemura, K; Kondo, T; Sakurai, K; Ozawa, T; Hikida, T; Komine, O; Yamanaka, K; Fujita, Y; Yamashita, T; Matsumoto, T; Hara, E	Matsudaira, Tatsuyuki; Nakano, Sosuke; Konishi, Yusuke; Kawamoto, Shimpei; Uemura, Ken; Kondo, Tamae; Sakurai, Koki; Ozawa, Takaaki; Hikida, Takatoshi; Komine, Okiru; Yamanaka, Koji; Fujita, Yuki; Yamashita, Toshihide; Matsumoto, Tomonori; Hara, Eiji	Cellular senescence in white matter microglia is induced during ageing in mice and exacerbates the neuroinflammatory phenotype	COMMUNICATIONS BIOLOGY		CENTRAL-NERVOUS-SYSTEM; P16(INK4A); MACROPHAGES; HEALTH; MOUSE	Osaka University; Osaka University; Nagoya University; Osaka University; Osaka University; Osaka University	14	Commun. Biol.	JUN 23	2023	10.1038/s42003-023-05027-2	Biology; Multidisciplinary Sciences	Life Sciences & Biomedicine - Other Topics; Science & Technology - Other Topics
scRNA-seq	Alzheimer’s disease	mice	postmortem brain	GSE176085	Dvir-Szternfeld, R; Castellani, G; Arad, M; Cahalon, L; Colaiuta, SP; Keren-Shaul, H; Croese, T; Burgaletto, C; Baruch, K; Ulland, T; Colonna, M; Weiner, A; Amit, I; Schwartz, M	Dvir-Szternfeld, Raz; Castellani, Giulia; Arad, Michal; Cahalon, Liora; Colaiuta, Sarah Phoebeluc; Keren-Shaul, Hadas; Croese, Tommaso; Burgaletto, Chiara; Baruch, Kuti; Ulland, Tyler; Colonna, Marco; Weiner, Assaf; Amit, Ido; Schwartz, Michal	Alzheimer's disease modification mediated by bone marrow-derived macrophages via a TREM2-independent pathway in mouse model of amyloidosis	NATURE AGING		IMMUNE-CHECKPOINT BLOCKADE; A-BETA; MICROGLIAL RESPONSE; INFLAMMATION; MONOCYTES; TOXICITY; CELLS; ACCUMULATION; CLEARANCE; RECEPTORS	Weizmann Institute of Science; Weizmann Institute of Science; Washington University (WUSTL)	14	Nature Aging	JAN	2022	10.1038/s43587-021-00149-w	Cell Biology; Geriatrics & Gerontology; Neurosciences	Cell Biology; Geriatrics & Gerontology; Neurosciences & Neurology
scRNA-seq	Alzheimer’s disease	mice	postmortem brain	GSE178956	Sankowski, R; Ahmari, J; Mezö, C; de Angelis, ALH; Fuchs, V; Utermöhlen, O; Buch, T; Blank, T; de Agüero, MG; Macpherson, AJ; Erny, D	Sankowski, Roman; Ahmari, Jasmin; Mezoe, Charlotte; de Angelis, Anna Lena Hrabe; Fuchs, Vidmante; Utermoehlen, Olaf; Buch, Thorsten; Blank, Thomas; de Agueero, Mercedes Gomez; Macpherson, Andrew J.; Erny, Daniel	Commensal microbiota divergently affect myeloid subsets in the mammalian central nervous system during homeostasis and disease	EMBO JOURNAL	Alzheimer's disease; CNS-associated macrophages; LCMV; microbiota; microglia	PERIVASCULAR MACROPHAGES; MICROGLIA; FATE; ENVIRONMENT; EXPRESSION; MONOCYTES; DYNAMICS; IDENTITY; DISTINCT; DRIVES	University of Freiburg; University of Freiburg; University of Freiburg; University of Cologne; University of Cologne; University of Zurich; University of Bern; University Hospital of Bern; University of Freiburg	13	Embo J.	DEC 1	2021	10.15252/embj.2021108605	Biochemistry & Molecular Biology; Cell Biology	Biochemistry & Molecular Biology; Cell Biology
scRNA-seq	Alzheimer’s disease	mice	hippocampus	GSE230333	Walgrave, H; Penning, A; Tosoni, G; Snoeck, S; Davie, K; Davis, E; Wolfs, L; Sierksma, A; Mars, M; Bu, TF; Thrupp, N; Zhou, LJ; Moechars, D; Mancuso, R; Fiers, M; Howden, AJM; De Strooper, B; Salta, E	Walgrave, Hannah; Penning, Amber; Tosoni, Giorgia; Snoeck, Sarah; Davie, Kristofer; Davis, Emma; Wolfs, Leen; Sierksma, Annerieke; Mars, Mayte; Bu, Taofeng; Thrupp, Nicola; Zhou, Lujia; Moechars, Diederik; Mancuso, Renzo; Fiers, Mark; Howden, Andrew J. M.; De Strooper, Bart; Salta, Evgenia	microRNA-132 regulates gene expression programs involved in microglial homeostasis	ISCIENCE		ALZHEIMERS-DISEASE; MESSENGER-RNA; MAMMALIAN MICRORNAS; BINDING PROTEIN; NONCODING RNA; MOUSE-BRAIN; ADULT; MIR-132; TREM2; NEURONS	Flanders Institute for Biotechnology (VIB); KU Leuven; Royal Netherlands Academy of Arts & Sciences; Netherlands Institute for Neuroscience (NIN-KNAW); Flanders Institute for Biotechnology (VIB); University of London; University College London; Johnson & Johnson; Janssen Pharmaceuticals; Flanders Institute for Biotechnology (VIB); University of Antwerp; University of Dundee	12	iScience	JUN 16	2023	10.1016/j.isci.2023.106829	Multidisciplinary Sciences	Science & Technology - Other Topics
scRNA-seq	multiple sclerosis	mice	postmortem brain	GSE199460	Fournier, AP; Tastet, O; Charabati, M; Hoornaert, C; Bourbonnière, L; Klement, W; Larouche, S; Tea, F; Wang, YC; Larochelle, C; Arbour, N; Ragoussis, J; Zandee, S; Prat, A	Fournier, Antoine Philippe; Tastet, Olivier; Charabati, Marc; Hoornaert, Chloe; Bourbonniere, Lyne; Klement, Wendy; Larouche, Sandra; Tea, Fiona; Wang, Yu Chang; Larochelle, Catherine; Arbour, Nathalie; Ragoussis, Jiannis; Zandee, Stephanie; Prat, Alexandre	Single-Cell Transcriptomics Identifies Brain Endothelium Inflammatory Networks in Experimental Autoimmune Encephalomyelitis	NEUROLOGY-NEUROIMMUNOLOGY & NEUROINFLAMMATION		NATURAL-KILLER-CELLS; CENTRAL VEIN SIGN; MULTIPLE-SCLEROSIS; T-CELLS; SYSTEM; RITUXIMAB; BARRIER; ACTIVATION; DISEASE; ATLAS	Universite de Montreal; Universite de Montreal; Universite de Montreal; McGill University	12	Neurol.-Neuroimmunol. Neuroinflammation	JAN	2023	10.1212/NXI.0000000000200046	Clinical Neurology; Neurosciences	Neurosciences & Neurology
scRNA-seq	neuroinflammation	human	human iPSCs	PRJEB55440	Washer, SJ; Perez-Alcantara, M; Chen, YX; Steer, J; James, WS; Trynka, G; Bassett, AR; Cowley, SA	Washer, Sam J.; Perez-Alcantara, Marta; Chen, Yixi; Steer, Juliette; James, William S.; Trynka, Gosia; Bassett, Andrew R.; Cowley, Sally A.	Single-cell transcriptomics defines an improved, validated monoculture protocol for differentiation of human iPSC to microglia	SCIENTIFIC REPORTS		COLONY-STIMULATING FACTOR; PLURIPOTENT STEM-CELLS; RISK LOCI; GM-CSF; EXPRESSION; HOMEOSTASIS; DERIVATION; NEURONS; BETA	University of Oxford; Wellcome Trust Sanger Institute	12	Sci Rep	NOV 14	2022	10.1038/s41598-022-23477-2	Multidisciplinary Sciences	Science & Technology - Other Topics
scRNA-seq	neuroinflammation	fly	postmortem brain	GSE223626	Praschberger, R; Kuenen, S; Schoovaerts, N; Kaempf, N; Singh, J; Janssens, J; Swerts, J; Nachman, E; Calatayud, C; Aerts, S; Poovathingal, S; Verstreken, P	Praschberger, Roman; Kuenen, Sabine; Schoovaerts, Nils; Kaempf, Natalie; Singh, Jeevanjot; Janssens, Jasper; Swerts, Jef; Nachman, Eliana; Calatayud, Carles; Aerts, Stein; Poovathingal, Suresh; Verstreken, Patrik	Neuronal identity defines a-synuclein and tau toxicity	NEURON		DIFFERENTIAL EXPRESSION ANALYSIS; PAIRED HELICAL FILAMENTS; ALPHA-SYNUCLEIN; SUBSTANTIA-NIGRA; RNA-SEQ; CALCIUM HOMEOSTASIS; SEMANTIC SIMILARITY; PARKINSONS-DISEASE; R PACKAGE; Q-SYSTEM	Flanders Institute for Biotechnology (VIB); KU Leuven; KU Leuven; KU Leuven	11	Neuron	MAY 17	2023	10.1016/j.neuron.2023.02.033	Neurosciences	Neurosciences & Neurology
scRNA-seq	Parkinson’s disease	human	peripheral blood	figshare https://doi.org/10.6084/m9.figshare.19380230	Abdelmoaty, MM; Machhi, J; Yeapuri, P; Shahjin, F; Kumar, V; Olson, KE; Mosley, RL; Gendelman, HE	Abdelmoaty, Mai M.; Machhi, Jatin; Yeapuri, Pravin; Shahjin, Farah; Kumar, Vikas; Olson, Katherine E.; Mosley, R. Lee; Gendelman, Howard E.	Monocyte biomarkers define sargramostim treatment outcomes for Parkinson's disease	CLINICAL AND TRANSLATIONAL MEDICINE	Parkinson's disease; GM-CSF; monocytes; scRNA-seq; proteomics; biomarkers	ALPHA-SYNUCLEIN; CEREBROSPINAL-FLUID; MESSENGER-RNA; T-CELLS; GM-CSF; AUTOPHAGY; MODEL; NEURODEGENERATION; INFLAMMATION; PATHOGENESIS	University of Nebraska System; University of Nebraska Medical Center; Egyptian Knowledge Bank (EKB); National Research Centre (NRC); University of Nebraska System; University of Nebraska Medical Center; University of Nebraska System; University of Nebraska Medical Center	11	Clin. Transl. Med.	JUL	2022	10.1002/ctm2.958	Oncology; Medicine, Research & Experimental	Oncology; Research & Experimental Medicine
scRNA-seq	neuroinflammation	mice	postmortem brain	GSE163055	Vailati-Riboni, M; Rund, L; Caetano-Silva, ME; Hutchinson, NT; Wang, SS; Soto-Diaz, K; Woods, JA; Steelman, AJ; Johnson, RW	Vailati-Riboni, Mario; Rund, Laurie; Caetano-Silva, Maria Elisa; Hutchinson, Noah T.; Wang, Selena S.; Soto-Diaz, Katiria; Woods, Jeffrey A.; Steelman, Andrew J.; Johnson, Rodney W.	Dietary Fiber as a Counterbalance to Age-Related Microglial Cell Dysfunction	FRONTIERS IN NUTRITION	aging; fiber; gut-brain axis; microglia; neuroinflammation; short-chain fatty acids	GUT MICROBIOTA; BRAIN; EXPRESSION; NEUROINFLAMMATION; GPR41/FFAR3; COGNITION; INULIN	University of Illinois System; University of Illinois Urbana-Champaign; University of Illinois System; University of Illinois Urbana-Champaign; University of Illinois System; University of Illinois Urbana-Champaign	11	Front. Nutr.	MAR 14	2022	10.3389/fnut.2022.835824	Nutrition & Dietetics	Nutrition & Dietetics
scRNA-seq	neuroinflammation	human	human iPSCs	GSE169751	Neely, MD; Xie, SJ; Prince, LM; Kim, HJ; Tukker, AM; Aschner, M; Thimmapuram, J; Bowman, AB	Neely, M. Diana; Xie, Shaojun; Prince, Lisa M.; Kim, Hyunjin; Tukker, Anke M.; Aschner, Michael; Thimmapuram, Jyothi; Bowman, Aaron B.	Single cell RNA sequencing detects persistent cell type- and methylmercury exposure paradigm-specific effects in a human cortical neurodevelopmental model	FOOD AND CHEMICAL TOXICOLOGY	Cortex; Glutamatergic; Neuron; Human-induced pluripotent stem cells; Methylmercury; Single cell RNA sequencing	DEVELOPING NERVOUS-SYSTEM; METHYL MERCURY; IN-VITRO; DEVELOPMENTAL NEUROTOXICITY; NEURONAL MIGRATION; ALZHEIMERS-DISEASE; PRENATAL EXPOSURE; MINAMATA DISEASE; CEREBRAL-CORTEX; LOW-LEVEL	Vanderbilt University; Purdue University System; Purdue University; Purdue University System; Purdue University; Yeshiva University; Montefiore Medical Center; Albert Einstein College of Medicine	11	Food Chem. Toxicol.	AUG	2021	10.1016/j.fct.2021.112288	Food Science & Technology; Toxicology	Food Science & Technology; Toxicology
scRNA-seq	multiple sclerosis	human	human iPSCs	undisclosed	Kerkering, J; Muinjonov, B; Rosiewicz, KS; Diecke, S; Biese, C; Schiweck, J; Chien, CD; Zocholl, D; Conrad, T; Paul, F; Alisch, M; Siffrin, V	Kerkering, Janis; Muinjonov, Bakhrom; Rosiewicz, Kamil S.; Diecke, Sebastian; Biese, Charlotte; Schiweck, Juliane; Chien, Claudia; Zocholl, Dario; Conrad, Thomas; Paul, Friedemann; Alisch, Marlen; Siffrin, Volker	iPSC-derived reactive astrocytes from patients with multiple sclerosis protect cocultured neurons in inflammatory conditions	JOURNAL OF CLINICAL INVESTIGATION		NECROSIS-FACTOR-ALPHA; REGULATORY T-CELLS; EXPRESSION; LYMPHOCYTES; ACTIVATION; DISEASE; INTERLEUKIN-17; SECUKINUMAB; CONVERSION; INDUCTION	Berlin Institute of Health; Free University of Berlin; Humboldt University of Berlin; Charite Universitatsmedizin Berlin; Helmholtz Association; Max Delbruck Center for Molecular Medicine; Helmholtz Association; Max Delbruck Center for Molecular Medicine; Berlin Institute of Health; Free University of Berlin; Humboldt University of Berlin; Charite Universitatsmedizin Berlin; Berlin Institute of H…	10	J. Clin. Invest.	JUL 3	2023	10.1172/JCI164637	Medicine, Research & Experimental	Research & Experimental Medicine
scRNA-seq	neuroinflammation	zebrafish	postmortem brain	undisclosed	Zhang, SX; Wu, LL; Zhang, JR; Wang, XT; Yang, X; Xin, Y; Chen, L; Li, J; Niu, PY	Zhang, Shixuan; Wu, Luli; Zhang, Junrou; Wang, Xueting; Yang, Xin; Xin, Ye; Chen, Li; Li, Jie; Niu, Piye	Multi-omics analysis reveals Mn exposure affects ferroptosis pathway in zebrafish brain	ECOTOXICOLOGY AND ENVIRONMENTAL SAFETY	Manganese; Single-cell RNA sequencing; Multi-omics joint analysis; Ferroptosis	PARKINSONS-DISEASE; MANGANESE EXPOSURE	Capital Medical University; Capital Medical University	10	Ecotox. Environ. Safe.	MAR 15	2023	10.1016/j.ecoenv.2023.114616	Environmental Sciences; Toxicology	Environmental Sciences & Ecology; Toxicology
scRNA-seq	Alzheimer’s disease	mice and human	human iPSCs	PRJNA644744, PRJNA922058	Marsan, E; Velmeshev, D; Ramsey, A; Patel, RK; Zhang, JS; Koontz, M; Andrews, MG; de Majo, M; Mora, C; Blumenfeld, J; Li, AN; Spina, S; Grinberg, LT; Seeley, WW; Miller, BL; Ullian, EM; Krummel, MF; Kriegstein, AR; Huang, EJ	Marsan, Elise; Velmeshev, Dmitry; Ramsey, Arren; Patel, Ravi K.; Zhang, Jiasheng; Koontz, Mark; Andrews, Madeline G.; de Majo, Martina; Mora, Cristina; Blumenfeld, Jessica; Li, Alissa N.; Spina, Salvatore; Grinberg, Lea T.; Seeley, William W.; Miller, Bruce L.; Ullian, Erik M.; Krummel, Matthew F.; Kriegstein, Arnold R.; Huang, Eric J.	Astroglial toxicity promotes synaptic degeneration in the thalamocortical circuit in frontotemporal dementia with GRN mutations	JOURNAL OF CLINICAL INVESTIGATION		AQUAPORIN-4 AQP4; CELL; TDP-43; DYSFUNCTION; GLUTAMATE; REVEALS; NEURONS; MODEL	University of California System; University of California San Francisco; University of California System; University of California San Francisco; University of California System; University of California San Francisco; Duke University; University of California System; University of California San Francisco; Arizona State University; Arizona State University-Tempe; University of California System;…	10	J. Clin. Invest.	MAR 15	2023	10.1172/JCI164919	Medicine, Research & Experimental	Research & Experimental Medicine
scRNA-seq	Amyotrophic lateral sclerosis	human	human iPSCs	undisclosed	Imamura, K; Izumi, Y; Nagai, M; Nishiyama, K; Watanabe, Y; Hanajima, R; Egawa, N; Ayaki, T; Oki, R; Fujita, K; Uozumi, R; Morinaga, A; Hirohashi, T; Fujii, Y; Yamamoto, T; Tatebe, H; Tokuda, T; Takahashi, N; Morita, S; Takahashi, R; Inoue, H	Imamura, Keiko; Izumi, Yuishin; Nagai, Makiko; Nishiyama, Kazutoshi; Watanabe, Yasuhiro; Hanajima, Ritsuko; Egawa, Naohiro; Ayaki, Takashi; Oki, Ryosuke; Fujita, Koji; Uozumi, Ryuji; Morinaga, Akiko; Hirohashi, Tomoko; Fujii, Yosuke; Yamamoto, Takuya; Tatebe, Harutsugu; Tokuda, Takahiko; Takahashi, Naoto; Morita, Satoshi; Takahashi, Ryosuke; Inoue, Haruhisa	Safety and tolerability of bosutinib in patients with amyotrophic lateral sclerosis (iDReAM study): A multicentre, open-label, dose-escalation phase 1 trial	ECLINICALMEDICINE		EXPRESSION; BIOMARKER; DECLINE	Kyoto University; Tokushima University; Kitasato University; Tottori University; Kyoto University; Kyoto University; Pfizer; Pfizer; National Institutes for Quantum Science & Technology; Akita University	10	EClinicalMedicine	NOV	2022	10.1016/j.eclinm.2022.101707	Medicine, General & Internal	General & Internal Medicine
scRNA-seq	Huntington’s disease	human	brain organoids	GSE183903	Chen, XY; Saiyin, HXG; Yang, L; Wang, YQ; Xuan, L; Rong, J; Ma, LX	Chen, Xinyu; Saiyin, Hexige; Yang Liu; Wang, Yuqi; Xuan Li; Rong Ji; Ma, Lixiang	Human striatal organoids derived from pluripotent stem cells recapitulate striatal development and compartments	PLOS BIOLOGY		HUMAN CORTICAL ORGANOIDS; HUMAN BRAIN-DEVELOPMENT; NEURONS; DIFFERENTIATION; MODEL; GENE; SPECIFICATION; DOUBLECORTIN; EXPRESSION; STRIOSOME	Fudan University; Fudan University; Sun Yat Sen University; Fudan University	10	PLoS. Biol.	NOV	2022	10.1371/journal.pbio.3001868	Biochemistry & Molecular Biology; Biology	Biochemistry & Molecular Biology; Life Sciences & Biomedicine - Other Topics
scRNA-seq	Alzheimer’s disease	mice	spinal cord	GSE163948	Tan, WL; Su, PYP; Leff, J; Gao, X; Chen, J; Guan, AK; Kalyanasundaram, G; Ma, A; Guan, ZH	Tan, Wulin; Su, Po-Yi Paul; Leff, Jacqueline; Gao, Xiang; Chen, Jiao; Guan, Andrew K.; Kalyanasundaram, Gokul; Ma, Averil; Guan, Zhonghui	Distinct phases of adult microglia proliferation: a Myc-mediated early phase and a Tnfaip3-mediated late phase	CELL DISCOVERY		MOUSE MODEL; IN-VIVO; PROGRESSION; TURNOVER; CELLS; REVEALS; RNA	University of California System; University of California San Francisco; Sun Yat Sen University; Sun Yat Sen University; University of California System; University of California San Francisco	10	Cell Discov.	APR 12	2022	10.1038/s41421-022-00377-3	Cell Biology	Cell Biology
scRNA-seq	multiple sclerosis	human	postmortem brain	GSE196953	Jamann, H; Cui, QL; Desu, HL; Pernin, F; Tastet, O; Halaweh, A; Farzam-kia, N; Mamane, VH; Ouédraogo, O; Cleret-Buhot, A; Daigneault, A; Balthazard, R; Klement, W; Lemaître, F; Arbour, N; Antel, J; Stratton, JA; Larochelle, C	Jamann, Helene; Cui, Qiao-Ling; Desu, Haritha L.; Pernin, Florian; Tastet, Olivier; Halaweh, Alexandre; Farzam-kia, Negar; Mamane, Victoria Hannah; Ouedraogo, Oumarou; Cleret-Buhot, Aurelie; Daigneault, Audrey; Balthazard, Renaud; Klement, Wendy; Lemaitre, Florent; Arbour, Nathalie; Antel, Jack; Stratton, Jo Anne; Larochelle, Catherine	Contact-Dependent Granzyme B-Mediated Cytotoxicity of Th17-Polarized Cells Toward Human Oligodendrocytes	FRONTIERS IN IMMUNOLOGY	human oligodendrocytes; neuroinflammation; multiple sclerosis; Th17 cells; granzyme B; CD4 T lymphocytes	BLOOD-BRAIN-BARRIER; CD4(+)CD28(-) T-CELLS; TUMOR-NECROSIS-FACTOR; FATTY-ACID SYNTHESIS; TH17 CELLS; DIFFERENTIAL REGULATION; IN-VITRO; PROMOTES; LYMPHOCYTES; RECRUITMENT	Universite de Montreal; Universite de Montreal; McGill University; Universite de Montreal	10	Front. Immunol.	APR 11	2022	10.3389/fimmu.2022.850616	Immunology	Immunology
scRNA-seq	multiple sclerosis	human	peripheral blood	undisclosed	Shi, ZY; Wang, XF; Wang, JC; Chen, HX; Du, Q; Lang, YL; Kong, LY; Luo, WQ; Qiu, YH; Zhang, Y; Li, C; Wen, DK; Yao, J; Cheng, X; Cai, LJ; Lin, X; Wang, R; Mou, ZC; Li, SJ; Liu, DY; Zhou, H; Zhou, HY; Yang, M	Shi, Ziyan; Wang, Xiaofei; Wang, Jiancheng; Chen, Hongxi; Du, Qin; Lang, Yanlin; Kong, Lingyao; Luo, Wenqin; Qiu, Yuhan; Zhang, Ying; Li, Chen; Wen, Dingke; Yao, Jie; Cheng, Xia; Cai, Linjun; Lin, Xue; Wang, Rui; Mou, Zichao; Li, Shuangjie; Liu, Duanya; Zhou, Hong; Zhou, Hongyu; Yang, Mu	Granzyme B+CD8+T cells with terminal differentiated effector signature determine multiple sclerosis progression	JOURNAL OF NEUROINFLAMMATION	Multiple sclerosis; Secondary progression; Single-cell RNA sequencing; CD8+T-EMRA cells; GzmB; Clonal expansion	T-CELLS; MECHANISMS; LESIONS; VIRUS	Sichuan University; University of Electronic Science & Technology of China; Sichuan University; University of Electronic Science & Technology of China	9	J. Neuroinflamm.	JUN 2	2023	10.1186/s12974-023-02810-0	Immunology; Neurosciences	Immunology; Neurosciences & Neurology
scRNA-seq	Alzheimer’s disease	human	human iPSCs	GSE186301	Monzón-Sandoval, J; Burlacu, E; Agarwal, D; Handel, AE; Wei, LT; Davis, J; Cowley, SA; Cader, MZ; Webber, C	Monzon-Sandoval, Jimena; Burlacu, Elena; Agarwal, Devika; Handel, Adam E.; Wei, Liting; Davis, John; Cowley, Sally A.; Cader, M. Zameel; Webber, Caleb	Lipopolysaccharide distinctively alters human microglia transcriptomes to resemble microglia from Alzheimer's disease mouse models	DISEASE MODELS & MECHANISMS	iPSC-microglia; Alzheimer's disease; ATP.S; IFN-gamma; LPS; PGE(2)	INDUCED ATP RELEASE; GENE-EXPRESSION; BRAIN; INFLAMMATION; ACTIVATION; RECEPTORS; NETWORKS; NEURONS; GAMMA	Cardiff University; University of Oxford; University of Oxford; University of Oxford; University of Oxford; University of Oxford	9	Dis. Model. Mech.	OCT	2022	10.1242/dmm.049349	Cell Biology; Pathology	Cell Biology; Pathology
scRNA-seq	neuroinflammation	mice and human	hypothalamus, tumor	GSE206861	Ainiwan, Y; Chen, YG; Mao, CF; Peng, JX; Chen, SY; Wei, ST; Qi, ST; Pan, J	Ainiwan, Yilamujiang; Chen, Yiguang; Mao, Chaofu; Peng, Junxiang; Chen, Siyuan; Wei, Songtao; Qi, Songtao; Pan, Jun	Adamantinomatous craniopharyngioma cyst fluid can trigger inflammatory activation of microglia to damage the hypothalamic neurons by inducing the production of β-amyloid	JOURNAL OF NEUROINFLAMMATION	Adamantinomatous Craniopharyngioma; Cyst Fluid; Hypothalamus; Single-Cell RNA Sequencing; Microglia; Inflammation; beta-Amyloid; Growth Retardation; Obesity	GROWTH-HORMONE; ARCUATE NUCLEUS; ALPHA-MSH; EXPRESSION; OBESITY; PCSK1; IDENTIFICATION; CONNECTIVITY; RETARDATION; MUTATIONS	Southern Medical University - China	9	J. Neuroinflamm.	MAY 7	2022	10.1186/s12974-022-02470-6	Immunology; Neurosciences	Immunology; Neurosciences & Neurology
scRNA-seq	Parkinson’s disease	human	human iPSCs	GSE183248	Novak, G; Kyriakis, D; Grzyb, K; Bernini, M; Rodius, S; Dittmar, G; Finkbeiner, S; Skupin, A	Novak, Gabriela; Kyriakis, Dimitrios; Grzyb, Kamil; Bernini, Michela; Rodius, Sophie; Dittmar, Gunnar; Finkbeiner, Steven; Skupin, Alexander	Single-cell transcriptomics of human iPSC differentiation dynamics reveal a core molecular network of Parkinson's disease	COMMUNICATIONS BIOLOGY		TYROSINE-HYDROXYLASE; DAMAGED MITOCHONDRIA; GENE-EXPRESSION; HUMAN ES; PROTEIN; IDENTIFICATION; PINK1; PLURIPOTENCY; NEURONS; BRAIN	University of Luxembourg; Luxembourg Institute of Health; University of California System; University of California San Francisco; The J David Gladstone Institutes; University of California System; University of California San Francisco; Luxembourg Institute of Health; University of Luxembourg; University of California System; University of California San Diego	9	Commun. Biol.	JAN 13	2022	10.1038/s42003-021-02973-7	Biology; Multidisciplinary Sciences	Life Sciences & Biomedicine - Other Topics; Science & Technology - Other Topics
scRNA-seq	Parkinson’s disease	human	human iPSCs	undisclosed	Xiong, GY; Zhang, B; Song, B; Luo, H; Zhao, LN; Wang, ZB; Zhou, ZJ; Chang, XL	Xiong, Guiya; Zhang, Bing; Song, Bo; Luo, Huan; Zhao, Lina; Wang, Zhibin; Zhou, Zhijun; Chang, Xiuli	Single-cell RNA sequencing reveals adverse effects of paraquat on the fate commitment of murine neural stem cells	SCIENCE OF THE TOTAL ENVIRONMENT	Paraquat; Single-cell RNA sequencing; Differentiation; Neural stem cell; Cell communication	ADULT HIPPOCAMPAL NEUROGENESIS; NUCLEAR FERRITIN; BRAIN; LINEAGE; DAMAGE; METALLOTHIONEIN; LOCALIZATION; ACTIVATION; EXPRESSION; STRATEGIES	Fudan University; Fudan University; Johns Hopkins University; Johns Hopkins Bloomberg School of Public Health; Johns Hopkins University	9	Sci. Total Environ.	SEP 1	2021	10.1016/j.scitotenv.2021.147386	Environmental Sciences	Environmental Sciences & Ecology
scRNA-seq	Parkinson’s disease	human	human iPSCs	undisclosed	Nilsson, F; Storm, P; Sozzi, E; Gil, DH; Birtele, M; Sharma, Y; Parmar, M; Fiorenzano, A	Nilsson, Fredrik; Storm, Petter; Sozzi, Edoardo; Hidalgo Gil, David; Birtele, Marcella; Sharma, Yogita; Parmar, Malin; Fiorenzano, Alessandro	Single-Cell Profiling of Coding and Noncoding Genes in Human Dopamine Neuron Differentiation	CELLS	human pluripotent stem cells; dopamine neuron differentiation; single-cell RNA sequencing		Lund University	9	Cells	JAN	2021	10.3390/cells10010137	Cell Biology	Cell Biology
scRNA-seq	Alzheimer’s disease	mice	postmortem brain	GSE142535	Gao, J; Littman, R; Diamante, G; Xiao, X; Ahn, IS; Yang, X; Cole, TA; Tontonoz, P	Gao, Jie; Littman, Russell; Diamante, Graciel; Xiao, Xu; Ahn, In Sook; Yang, Xia; Cole, Tracy A.; Tontonoz, Peter	Therapeutic IDOL Reduction Ameliorates Amyloidosis and Improves Cognitive Function in APP/PS1 Mice	MOLECULAR AND CELLULAR BIOLOGY	Alzheimers; IDOL; LXR; macrophage; microglia	COLONY-STIMULATING FACTOR; CENTRAL-NERVOUS-SYSTEM; ALZHEIMERS-DISEASE; APOLIPOPROTEIN-E; LIPOPROTEIN RECEPTOR; MOUSE MODEL; MICROGLIA; BETA; EXPRESSION; CELLS	University System of Ohio; Ohio State University; University of California System; University of California Los Angeles; University of California System; University of California Los Angeles; University of California System; University of California Los Angeles; Ionis Pharmaceuticals, Inc.; University of California System; University of California Los Angeles; University of California Los Angeles…	9	Mol. Cell. Biol.	APR	2020	10.1128/MCB.00518-19	Biochemistry & Molecular Biology; Cell Biology	Biochemistry & Molecular Biology; Cell Biology
scRNA-seq	Alzheimer’s disease	mice	forebrain	GSE208006	Lau, SF; Wu, W; Wong, HY; Ouyang, L; Qiao, Y; Xu, JH; Lau, JHY; Wong, CR; Jiang, YB; Holtzman, DM; Fu, AKY; Ip, NY	Lau, Shun-Fat; Wu, Wei; Wong, Hiu Yi; Ouyang, Li; Qiao, Yi; Xu, Jiahui; Lau, Jessica Hiu-Yan; Wong, Carlton; Jiang, Yuanbing; Holtzman, David M.; Fu, Amy K. Y.; Ip, Nancy Y.	The VCAM1-ApoE pathway directs microglial chemotaxis and alleviates Alzheimer's disease pathology	NATURE AGING		CELL-ADHESION MOLECULE-1; AMYLOID-BETA; MOUSE MODEL; APOLIPOPROTEIN-E; COMMON VARIANTS; TREM2; APOE; BRAIN; EXPRESSION; RECEPTOR	Hong Kong University of Science & Technology; Washington University (WUSTL); Shenzhen Research Institute, The Hong Kong University of Science & Technology; Hong Kong University of Science & Technology	8	Nature Aging	OCT	2023	10.1038/s43587-023-00491-1	Cell Biology; Geriatrics & Gerontology; Neurosciences	Cell Biology; Geriatrics & Gerontology; Neurosciences & Neurology
scRNA-seq	Alzheimer’s disease	mice	postmortem brain	GSE214747	Kaneko, R; Matsui, A; Watanabe, M; Harada, Y; Kanamori, M; Awata, N; Kawazoe, M; Takao, T; Kobayashi, Y; Kikutake, C; Suyama, M; Saito, T; Saido, TC; Ito, M	Kaneko, Ryusei; Matsui, Ako; Watanabe, Mahiro; Harada, Yoshihiro; Kanamori, Mitsuhiro; Awata, Natsumi; Kawazoe, Mio; Takao, Tomoaki; Kobayashi, Yutaro; Kikutake, Chie; Suyama, Mikita; Saito, Takashi; Saido, Takaomi C.; Ito, Minako	Increased neutrophils in inflammatory bowel disease accelerate the accumulation of amyloid plaques in the mouse model of Alzheimer's disease	INFLAMMATION AND REGENERATION	Alzheimer's disease; Inflammatory bowel disease; Neutrophils	CELLS; EXPRESSION; GAMMA; SEX	Kyushu University; Kyushu University; Nagoya City University	8	Inflamm. Regen.	MAR 15	2023	10.1186/s41232-023-00257-7	Immunology; Medicine, Research & Experimental	Immunology; Research & Experimental Medicine
scRNA-seq	neuroinflammation	mice	postmortem brain	GSE207750	Zia, S; Hammond, BP; Zirngibl, M; Sizov, A; Baaklini, CS; Panda, SP; Ho, MFS; Lee, KV; Mainali, A; Burr, MK; Williams, S; Caprariello, AV; Power, C; Simmen, T; Kerr, BJ; Plemel, JR	Zia, Sameera; Hammond, Brady P.; Zirngibl, Martin; Sizov, Anastasia; Baaklini, Charbel S.; Panda, Sharmistha P.; Ho, Madelene F. S.; Lee, Kelly V.; Mainali, Apurba; Burr, Mena K.; Williams, Sioned; Caprariello, Andrew V.; Power, Christopher; Simmen, Thomas; Kerr, Bradley J.; Plemel, Jason R.	Single-cell microglial transcriptomics during demyelination defines a microglial state required for lytic carcass clearance	MOLECULAR NEURODEGENERATION	Microglia; Demyelination; Cuprizone; Phagocytosis; Single-cell RNA sequencing; Heterogeneity; Primary culture	ACTIVATION; SYSTEM; HETEROGENEITY; INFLAMMATION; DEATH; NEURODEGENERATION; REMYELINATION; MACROPHAGES; MECHANISMS; ASTROCYTES	University of Alberta; University of Calgary; University of Alberta; University of Alberta; University of Alberta; University of Alberta	8	Mol. Neurodegener.	DEC 13	2022	10.1186/s13024-022-00584-2	Neurosciences	Neurosciences & Neurology
scRNA-seq	multiple sclerosis	mice	postmortem brain	GSE252551, GSE237558, GSE252498	Lee, HG; Rone, JM; Li, ZR; Akl, CF; Shin, SW; Lee, JH; Flausino, LE; Pernin, F; Chao, CC; Kleemann, KL; Srun, L; Illouz, T; Giovannoni, F; Charabati, M; Sanmarco, LM; Kenison, JE; Piester, G; Zandee, SEJ; Antel, JP; Rothhammer, V; Wheeler, MA; Prat, A; Clark, IC; Quintana, FJ	Lee, Hong-Gyun; Rone, Joseph M.; Li, Zhaorong; Akl, Camilo Faust; Shin, Seung Won; Lee, Joon-Hyuk; Flausino, Lucas E.; Pernin, Florian; Chao, Chun-Cheih; Kleemann, Kilian L.; Srun, Lena; Illouz, Tomer; Giovannoni, Federico; Charabati, Marc; Sanmarco, Liliana M.; Kenison, Jessica E.; Piester, Gavin; Zandee, Stephanie E. J.; Antel, Jack P.; Rothhammer, Veit; Wheeler, Michael A.; Prat, Alexandre; Cl…	Disease-associated astrocyte epigenetic memory promotes CNS pathology	NATURE		NF-KAPPA-B; HISTONE ACETYLATION; P300; METABOLISM; CHROMATIN; RESPONSES; ALIGNMENT; DURATION; SYSTEM	Harvard University; Harvard Medical School; Brigham & Women's Hospital; Harvard University; Massachusetts Institute of Technology (MIT); Broad Institute; University of California System; University of California Berkeley; McGill University; University of Portsmouth; University of Rochester; Universite de Montreal; University of Erlangen Nuremberg	7	Nature	MAR 28	2024	10.1038/s41586-024-07187-5	Multidisciplinary Sciences	Science & Technology - Other Topics
scRNA-seq	neuroinflammation	mice	postmortem brain	GSE129788, GSE243144	Wang, JK; Fang, CL; Noller, K; Wei, ZL; Liu, GQ; Shen, K; Song, KP; Cao, X; Wan, M	Wang, Jiekang; Fang, Ching-Lien; Noller, Kathleen; Wei, Zhiliang; Liu, Guanqiao; Shen, Ke; Song, Kangping; Cao, Xu; Wan, Mei	Bone-derived PDGF-BB drives brain vascular calcification in male mice	JOURNAL OF CLINICAL INVESTIGATION		INTRACRANIAL CALCIFICATIONS; TRANSCRIPTION FACTOR; BASAL GANGLIA; GROWTH-FACTOR; EXPRESSION; PERICYTES; PATHWAYS; DISEASE; MUSCLE; CELLS	Johns Hopkins University; Johns Hopkins University; Johns Hopkins University; Johns Hopkins University; Johns Hopkins Medicine	7	J. Clin. Invest.	DEC 1	2023	10.1172/JCI168447	Medicine, Research & Experimental	Research & Experimental Medicine
scRNA-seq	Alzheimer’s disease	human	human iPSCs	syn30866487	Zhao, J; Ikezu, TC; Lu, WY; Macyczko, JR; Li, YH; Lewis-Tuffin, LJ; Martens, YA; Ren, YX; Zhu, YY; Asmann, YW; Ertekin-Taner, N; Kanekiyo, T; Bu, GJ	Zhao, Jing; Ikezu, Tadafumi C.; Lu, Wenyan; Macyczko, Jesse R.; Li, Yonghe; Lewis-Tuffin, Laura J.; Martens, Yuka A.; Ren, Yingxue; Zhu, Yiyang; Asmann, Yan W.; Ertekin-Taner, Nilufer; Kanekiyo, Takahisa; Bu, Guojun	APOE deficiency impacts neural differentiation and cholesterol biosynthesis in human iPSC-derived cerebral organoids	STEM CELL RESEARCH & THERAPY	Cerebral organoid; Apolipoprotein E; scRNA-seq; Neural differentiation; Cholesterol biosynthesis	CELL DIVERSITY; METABOLISM; NEURONS	Mayo Clinic; Mayo Clinic; Mayo Clinic; Mayo Clinic; Mayo Clinic	7	Stem Cell Res. Ther.	AUG 21	2023	10.1186/s13287-023-03444-y	Cell & Tissue Engineering; Cell Biology; Medicine, Research & Experimental	Cell Biology; Research & Experimental Medicine
scRNA-seq	neuroinflammation	mice	hippocampus, cortex	GSE178226	Zhu, DX; Zhang, J; Hashem, J; Gao, F; Chen, C	Zhu, Dexiao; Zhang, Jian; Hashem, Jack; Gao, Fei; Chen, Chu	Inhibition of 2-arachidonoylglycerol degradation enhances glial immunity by single-cell transcriptomic analysis	JOURNAL OF NEUROINFLAMMATION	Endocannabinoid; Immunity; Neuroinflammation; Monoacylglycerol lipase; Transcriptome; Single-cell RNA sequencing; Neurodegenerative disease; Vigilance	MONOACYLGLYCEROL LIPASE; MOUSE MODEL; SYNAPTIC-TRANSMISSION; ENDOCANNABINOID 2-ARACHIDONOYLGLYCEROL; MONOGLYCERIDE LIPASE; THERAPEUTIC TARGET; 2-AG; ASTROCYTES; EXPRESSION; PROTECTS	University of Texas System; University of Texas Health Science Center at San Antonio; University of Texas System; University of Texas Health Science Center at San Antonio	7	J. Neuroinflamm.	JAN 30	2023	10.1186/s12974-023-02701-4	Immunology; Neurosciences	Immunology; Neurosciences & Neurology
scRNA-seq	multiple sclerosis	mice	postmortem brain	GSE215820 https://doi.org/10.6084/m9.figshare.21539098.v1	Axisa, PP; Yoshida, TM; Lucca, LE; Kasler, HG; Lincoln, MR; Pham, GH; Del Priore, D; Carpier, JM; Lucas, CL; Verdin, E; Sumida, TS; Hafler, DA	Axisa, Pierre-Paul; Yoshida, Tomomi M.; Lucca, Liliana E.; Kasler, Herbert G.; Lincoln, Matthew R.; Pham, Giang H.; Del Priore, Dante; Carpier, Jean-Marie; Lucas, Carrie L.; Verdin, Eric; Sumida, Tomokazu S.; Hafler, David A.	A multiple sclerosis-protective coding variant reveals an essential role for HDAC7 in regulatory T cells	SCIENCE TRANSLATIONAL MEDICINE		HISTONE DEACETYLASE 7; REG-CELLS; NUCLEAR EXPORT; GENETIC RISK; TREG CELLS; AUTOIMMUNE; TRANSCRIPTION; KINASE; MECHANISMS; INHIBITION	Yale University; Yale University; Buck Institute for Research on Aging; Harvard University; Massachusetts Institute of Technology (MIT); Broad Institute; Harvard University; Universite de Toulouse; Universite Toulouse III - Paul Sabatier; Institut National de la Sante et de la Recherche Medicale (Inserm); Centre National de la Recherche Scientifique (CNRS); University of Toronto; University of To…	7	Sci. Transl. Med.	DEC 14	2022	10.1126/scitranslmed.abl3651	Cell Biology; Medicine, Research & Experimental	Cell Biology; Research & Experimental Medicine
scRNA-seq	neuroinflammation	zebrafish	postmortem brain	undisclosed	Ha, SM; Barnhill, LM; Li, S; Bronstein, JM	Ha, Sung Min; Barnhill, Lisa M.; Li, Sharon; Bronstein, Jeff M.	Neurotoxicity of diesel exhaust extracts in zebrafish and its implications for neurodegenerative disease	SCIENTIFIC REPORTS		NEUROINFLAMMATION; VISUALIZATION; ACTIVATION; EXPRESSION; PATHWAYS; NEURONS	University of California System; University of California Los Angeles; University of California Los Angeles Medical Center; David Geffen School of Medicine at UCLA; University of California System; University of California Los Angeles; University of California Los Angeles Medical Center; David Geffen School of Medicine at UCLA; University of California System; University of California Los Angeles…	7	Sci Rep	NOV 12	2022	10.1038/s41598-022-23485-2	Multidisciplinary Sciences	Science & Technology - Other Topics
scRNA-seq	Alzheimer’s disease	mice	hippocampus, cortex	PRJNA766517	Jo, KW; Lee, D; Cha, DG; Oh, E; Choi, YH; Kim, S; Park, ES; Kim, JK; Kim, KT	Jo, Kyung Won; Lee, Dohyun; Cha, Dong Gon; Oh, Eunji; Choi, Yoon Ha; Kim, Somi; Park, Eun Seo; Kim, Jong Kyoung; Kim, Kyong-Tai	Gossypetin ameliorates 5xFAD spatial learning and memory through enhanced phagocytosis against Aβ	ALZHEIMERS RESEARCH & THERAPY	Gossypetin; Alzheimer's disease; Beta-amyloid (A beta); Phagocytosis; Disease-associated microglia; Single-cell RNA sequencing	NEURONS; INHIBITION; MICROGLIA; PEPTIDE	Pohang University of Science & Technology (POSTECH); Daegu Gyeongbuk Institute of Science & Technology (DGIST)	7	Alzheimers Res. Ther.	OCT 21	2022	10.1186/s13195-022-01096-3	Clinical Neurology; Neurosciences	Neurosciences & Neurology
scRNA-seq	neuroinflammation	mice and human	cerebral blood vessels	GSE204803	Romay, MC; Knutsen, RH; Ma, FY; Mompeón, A; Hernandez, GE; Salvador, J; Mirkov, S; Batra, A; Sullivan, DP; Procissi, D; Buchanan, S; Kronquist, E; Ferrante, EA; Muller, WA; Walshon, J; Steffens, A; McCortney, K; Horbinski, C; Tournier-Lasserve, E; Sonabend, AM; Sorond, FA; Wang, MM; Boehm, M; Kozel, BA; Iruela-Arispe, ML	Romay, Milagros C.; Knutsen, Russell H.; Ma, Feiyang; Mompeon, Ana; Hernandez, Gloria E.; Salvador, Jocelynda; Mirkov, Snezana; Batra, Ayush; Sullivan, David P.; Procissi, Daniele; Buchanan, Samuel; Kronquist, Elise; Ferrante, Elisa A.; Muller, William A.; Walshon, Jordain; Steffens, Alicia; McCortney, Kathleen; Horbinski, Craig; Tournier-Lasserve, Elisabeth; Sonabend, Adam M.; Sorond, Farzaneh A…	Age-related loss of Notch3 underlies brain vascular contractility deficiencies, glymphatic dysfunction, and neurodegeneration in mice	JOURNAL OF CLINICAL INVESTIGATION		CEREBROVASCULAR REACTIVITY; BLOOD-FLOW; IMPAIRMENT; ARTERIOPATHY; EXPRESSION; FAILURE; PATHWAY	Northwestern University; Feinberg School of Medicine; National Institutes of Health (NIH) - USA; NIH National Heart Lung & Blood Institute (NHLBI); University of California System; University of California Los Angeles; Northwestern University; Feinberg School of Medicine; Northwestern University; Feinberg School of Medicine; Northwestern University; Feinberg School of Medicine; Northwestern Unive…	6	J. Clin. Invest.	JAN 16	2024	10.1172/JCI166134	Medicine, Research & Experimental	Research & Experimental Medicine
scRNA-seq	Parkinson’s disease	mice	postmortem brain	GSE232840	Mcfleder, RL; Makhotkina, A; Groh, J; Keber, U; Imdahl, F; Mosca, JP; Peteranderl, A; Wu, JJ; Tabuchi, S; Hoffmann, J; Karl, AK; Pagenstecher, A; Vogel, J; Beilhack, A; Koprich, JB; Brotchie, JM; Saliba, AE; Volkmann, J; Ip, CW	Mcfleder, Rhonda L.; Makhotkina, Anastasiia; Groh, Janos; Keber, Ursula; Imdahl, Fabian; Mosca, Josefina Pena; Peteranderl, Alina; Wu, Jingjing; Tabuchi, Sawako; Hoffmann, Jan; Karl, Ann-Kathrin; Pagenstecher, Axel; Vogel, Jorg; Beilhack, Andreas; Koprich, James B.; Brotchie, Jonathan M.; Saliba, Antoine-Emmanuel; Volkmann, Jens; Ip, Chi Wang	Brain-to-gut trafficking of alpha-synuclein by CD11c+ cells in a mouse model of Parkinson's disease	NATURE COMMUNICATIONS			University of Wurzburg; Technical University of Munich; Philipps University Marburg; Helmholtz Association; Helmholtz-Center for Infection Research; University of Wurzburg; Krembil Research Institute; University of Toronto; University Health Network Toronto; University of Wurzburg	6	Nat. Commun.	NOV 20	2023	10.1038/s41467-023-43224-z	Multidisciplinary Sciences	Science & Technology - Other Topics
snRNA-seq;snATAC-seq	Amyotrophic lateral sclerosis	human	postmortem motor, frontal cortices	GSE219281	Li, JH; Jaiswal, MK; Chien, JF; Kozlenkov, A; Jung, JY; Zhou, P; Gardashli, M; Pregent, LJ; Engelberg-Cook, E; Dickson, DW; Belzil, VV; Mukamel, EA; Dracheva, S	Li, Junhao; Jaiswal, Manoj K.; Chien, Jo-Fan; Kozlenkov, Alexey; Jung, Jinyoung; Zhou, Ping; Gardashli, Mahammad; Pregent, Luc J.; Engelberg-Cook, Erica; Dickson, Dennis W.; Belzil, Veronique V.; Mukamel, Eran A.; Dracheva, Stella	Divergent single cell transcriptome and epigenome alterations in ALS and FTD patients with C9orf72 mutation	NATURE COMMUNICATIONS		AMYOTROPHIC-LATERAL-SCLEROSIS; FRONTOTEMPORAL LOBAR DEGENERATION; REPEAT EXPANSION; SELECTIVE VULNERABILITY; HEXANUCLEOTIDE REPEAT; MOTOR-NEURONS; GGGGCC REPEAT; RNA; ASTROCYTES; PROTEIN	University of California System; University of California San Diego; Icahn School of Medicine at Mount Sinai; Icahn School of Medicine at Mount Sinai; University of California System; University of California San Diego; Mayo Clinic; US Department of Veterans Affairs; Veterans Health Administration (VHA); James J. Peters VA Medical Center; US Department of Veterans Affairs; Veterans Health Adminis…	6	Nat. Commun.	SEP 15	2023	10.1038/s41467-023-41033-y	Multidisciplinary Sciences	Science & Technology - Other Topics
scRNA-seq	multiple sclerosis	mice	spinal cord	PRJNA648663, PRJNA734097	Xue, SR; Lozinski, BM; Ghorbani, S; Ta, K; Mello, CD'; Yong, VW; Dong, YF	Xue, Sara; Lozinski, Brian M.; Ghorbani, Samira; Ta, Khanh; Mello, Charlotte D. '; Yong, V. Wee; Dong, Yifei	Elevated Galectin-3 Is Associated with Aging, Multiple Sclerosis, and Oxidized Phosphatidylcholine-Induced Neurodegeneration	JOURNAL OF NEUROSCIENCE	aging; galectin 3; microglia; multiple sclerosis; neurodegeneration; oxidized phosphatidylcholine	SINGLE-CELL; MICROGLIA; MONOCYTES; INJURY; ACTIVATION; CLEARANCE; PROLIFERATION; DEMYELINATION; SURVEILLANCE; PHENOTYPE	University of Calgary; University of Calgary; University of Saskatchewan	6	J. Neurosci.	JUN 21	2023	10.1523/JNEUROSCI.2312-22.2023	Neurosciences	Neurosciences & Neurology
scRNA-seq	Parkinson’s disease	human	ventral midbrain	GSE192405	Birtele, M; Storm, P; Sharma, Y; Kajtez, J; Wahlestedt, JN; Sozzi, E; Nilsson, F; Stott, S; He, XL; Mattsson, B; Ottosson, DR; Barker, RA; Fiorenzano, A; Parmar, M	Birtele, Marcella; Storm, Petter; Sharma, Yogita; Kajtez, Janko; Wahlestedt, Jenny Nelander; Sozzi, Edoardo; Nilsson, Fredrik; Stott, Simon; He, Xiaoling L.; Mattsson, Bengt; Ottosson, Daniella Rylander; Barker, Roger A.; Fiorenzano, Alessandro; Parmar, Malin	Single-cell transcriptional and functional analysis of dopaminergic neurons in organoid-like cultures derived from human fetal midbrain	DEVELOPMENT	3D cultures; Dopamine Neurons; Human fetal dopamine neuron; Neurobiology; Parkinson?s disease	SUBSTANTIA-NIGRA; PRECLINICAL EFFICACY; MOLECULAR DIVERSITY; HUMAN FIBROBLASTS; BRAIN; MOUSE; EXPRESSION; MODEL	Lund University; Lund University; University of Cambridge; University of Cambridge; University of Cambridge	6	Development	DEC	2022	10.1242/dev.200504	Developmental Biology	Developmental Biology
scRNA-seq	multiple sclerosis	mice	spinal cord	undisclosed	Kwiatkowski, AJ; Helm, EY; Stewart, JM; Drashansky, TT; Cho, JJ; Avram, D; Keselowsky, BG	Kwiatkowski, Alexander J.; Helm, Eric Y.; Stewart, Joshua M.; Drashansky, Theodore T.; Cho, Jonathan J.; Avram, Dorina; Keselowsky, Benjamin G.	Treatment with an antigen-specific dual microparticle system reverses advanced multiple sclerosis in mice	PROCEEDINGS OF THE NATIONAL ACADEMY OF SCIENCES OF THE UNITED STATES OF AMERICA	immunotherapy; PLGA microparticles; multiple sclerosis; single-cell transcriptomics; antigen specific	EXPERIMENTAL AUTOIMMUNE ENCEPHALOMYELITIS; REGULATORY T-CELLS; DENDRITIC CELLS; CONTROLLED DELIVERY; ACTIVATION; TOLERANCE; PHENOTYPE; PREVENTS; MODULATOR; SINGLE	State University System of Florida; University of Florida; State University System of Florida; University of Florida; H Lee Moffitt Cancer Center & Research Institute; State University System of Florida; University of Florida	6	Proc. Natl. Acad. Sci. U. S. A.	OCT 19	2022	10.1073/pnas.2205417119	Multidisciplinary Sciences	Science & Technology - Other Topics
scRNA-seq	neuroinflammation	mice	postmortem brain	undisclosed	Sun, Y; Ho, CT; Liu, YN; Zhan, SN; Wu, ZF; Zheng, XJ; Zhang, X	Sun, Ying; Ho, Chi-Tang; Liu, Yanan; Zhan, Shennan; Wu, Zufang; Zheng, Xiaojie; Zhang, Xin	The Modulatory Effect of Cyclocarya paliurus Flavonoids on Intestinal Microbiota and Hypothalamus Clock Genes in a Circadian Rhythm Disorder Mouse Model	NUTRIENTS	circadian rhythm disruption; Cyclocarya paliurus flavonoids; gut microbiota; metabolites; single-cell RNA-seq	MYELINATION; DISEASE; HEALTH; SLEEP	Ningbo University; Rutgers University System; Rutgers University New Brunswick	6	Nutrients	JUN	2022	10.3390/nu14112308	Nutrition & Dietetics	Nutrition & Dietetics
scRNA-seq	Alzheimer’s disease	mice	spinal cord, postmortem brain	GSE169599, GSE169606, GSE169608, GSE190535	Yang, CY; Pang, YD; Huang, YG; Ye, F; Chen, XY; Gao, YS; Zhang, CQ; Yao, LF; Gao, JJ	Yang, Chunying; Pang, Yidan; Huang, Yigang; Ye, Fang; Chen, Xiaoyi; Gao, Youshui; Zhang, Changqing; Yao, Lufeng; Gao, Junjie	Single-cell transcriptomics identifies premature aging features of TERC-deficient mouse brain and bone marrow	GEROSCIENCE	Brain-bone axis; Aging; Telomerase; TERC; Single-cell RNA sequencing	ALZHEIMERS-DISEASE; TELOMERE DYSFUNCTION; GENE; ACTIVATION; MONOCYTES; INFLAMMATION; NEUROGENESIS; OSTEOPOROSIS; PATHOGENESIS; ENVIRONMENT	Ningbo University; Shanghai Jiao Tong University; Zhejiang University; Chinese Academy of Sciences; University of Chinese Academy of Sciences, CAS; Shanghai Jiao Tong University	6	GeroScience	AUG	2022	10.1007/s11357-022-00578-4	Geriatrics & Gerontology	Geriatrics & Gerontology
scRNA-seq	Amyotrophic lateral sclerosis	mice	postmortem brain	GSE230647	Hruska-Plochan, M; Wiersma, VI; Betz, KM; Mallona, I; Ronchi, S; Maniecka, Z; Hock, EM; Tantardini, E; Laferriere, F; Sahadevan, S; Hoop, V; Delvendahl, I; Perez-Berlanga, M; Gatta, B; Panatta, M; van der Bourg, A; Bohaciakova, D; Sharma, P; De Vos, L; Frontzek, K; Aguzzi, A; Lashley, T; Robinson, MD; Karayannis, T; Mueller, M; Hierlemann, A; Polymenidou, M	Hruska-Plochan, Marian; Wiersma, Vera I.; Betz, Katharina M.; Mallona, Izaskun; Ronchi, Silvia; Maniecka, Zuzanna; Hock, Eva-Maria; Tantardini, Elena; Laferriere, Florent; Sahadevan, Sonu; Hoop, Vanessa; Delvendahl, Igor; Perez-Berlanga, Manuela; Gatta, Beatrice; Panatta, Martina; van der Bourg, Alexander; Bohaciakova, Dasa; Sharma, Puneet; De Vos, Laura; Frontzek, Karl; Aguzzi, Adriano; Lashley,…	A model of human neural networks reveals NPTX2 pathology in ALS and FTLD	NATURE		FRONTOTEMPORAL LOBAR DEGENERATION; NEURONAL PENTRAXIN; EXCITATORY SYNAPSES; RNA; TDP-43; DISEASE; NARP; PROTEIN; AGGREGATION; MUTATIONS	University of Zurich; University of Zurich; Swiss Institute of Bioinformatics; University of Zurich; University of Zurich; Masaryk University Brno; University of Bern; University of Zurich; University of London; University College London; University of London; University College London	5	Nature	FEB 29	2024	10.1038/s41586-024-07042-7	Multidisciplinary Sciences	Science & Technology - Other Topics
scRNA-seq	Alzheimer’s disease	mice	hippocampus, cortex	GSE189626	Siddiqui, T; Cosacak, MI; Popova, S; Bhattarai, P; Yilmaz, E; Lee, AJ; Min, YH; Wang, X; Allen, M; Is, Ö; Atasavum, ZT; Rodriguez-Muela, N; Vardarajan, BN; Flaherty, D; Teich, AF; Santa-Maria, I; Freudenberg, U; Werner, C; Tosto, G; Mayeux, R; Ertekin-Taner, N; Kizil, C	Siddiqui, Tohid; Cosacak, Mehmet Ilyas; Popova, Stanislava; Bhattarai, Prabesh; Yilmaz, Elanur; Lee, Annie J.; Min, Yuhao; Wang, Xue; Allen, Mariet; Is, Oezkan; Atasavum, Zeynep Tansu; Rodriguez-Muela, Natalia; Vardarajan, Badri N.; Flaherty, Delaney; Teich, Andrew F.; Santa-Maria, Ismael; Freudenberg, Uwe; Werner, Carsten; Tosto, Giuseppe; Mayeux, Richard; Ertekin-Taner, Niluefer; Kizil, Caghan	Nerve growth factor receptor (Ngfr) induces neurogenic plasticity by suppressing reactive astroglial Lcn2/Slc22a17 signaling in Alzheimer's disease	NPJ REGENERATIVE MEDICINE		NEURAL STEM-CELLS; NF-KAPPA-B; ADULT HIPPOCAMPAL NEUROGENESIS; GENE-EXPRESSION; GLIAL-CELLS; LIPOCALIN 2; IN-VIVO; BRAIN; ACTIVATION; PROTEIN	Helmholtz Association; German Center for Neurodegenerative Diseases (DZNE); Technische Universitat Dresden; Columbia University; NewYork-Presbyterian Hospital; NewYork-Presbyterian Hospital; Columbia University; Columbia University; Mayo Clinic; Mayo Clinic; Columbia University; NewYork-Presbyterian Hospital; Universidad Francisco de Vitoria; Leibniz Institut fur Polymerforschung Dresden; Technis…	5	npj Regen. Med.	JUL 10	2023	10.1038/s41536-023-00311-5	Cell & Tissue Engineering; Engineering, Biomedical	Cell Biology; Engineering
scRNA-seq	multiple sclerosis	mice	spinal cord, postmortem brain	GSE206056	Thompson, JW; Hu, RZ; Huffaker, TB; Ramstead, AG; Ekiz, HA; Bauer, KM; Tang, WW; Ghazaryan, A; Round, JL; Fujinami, RS; OConnell, RM	Thompson, Jacob W.; Hu, Ruozhen; Huffaker, Thomas B.; Ramstead, Andrew G.; Ekiz, H. Atakan; Bauer, Kaylyn M.; Tang, William W.; Ghazaryan, Arevik; Round, June L.; Fujinami, Robert S.; OConnell, Ryan M.	MicroRNA-155 Plays Selective Cell-Intrinsic Roles in Brain-Infiltrating Immune Cell Populations during Neuroinflammation	JOURNAL OF IMMUNOLOGY		EXPERIMENTAL ALLERGIC ENCEPHALOMYELITIS; DENDRITIC CELLS; MIR-155; EXPRESSION; REGULATOR; INVASION; VIRUS; CNS	Utah System of Higher Education; University of Utah; Izmir Institute of Technology; Utah System of Higher Education; University of Utah	5	J. Immunol.	APR 1	2023	10.4049/jimmunol.2200478	Immunology	Immunology
scRNA-seq	neuroinflammation	mice	hippocampus, cortex	https://singlecell.broadinstitute.org/single_cell/study/SCP1962/dysregulation-of-neuroprotective-astrocytes-a-spectrum-of-microglial-activation-states-and-altered-hippocampal-neurogenesis-are-revealed-by-single-cell-rna-sequencing-in-prion-disease	Slota, JA; Sajesh, BV; Frost, KF; Medina, SJ; Booth, SA	Slota, Jessy A.; Sajesh, Babu V.; Frost, Kathy F.; Medina, Sarah J.; Booth, Stephanie A.	Dysregulation of neuroprotective astrocytes, a spectrum of microglial activation states, and altered hippocampal neurogenesis are revealed by single-cell RNA sequencing in prion disease	ACTA NEUROPATHOLOGICA COMMUNICATIONS	Prion disease; Neurodegeneration; Pathogenesis; Single-cell RNAseq; Systems biology; Microglia; Astrocytes; Neurons	ALZHEIMERS-DISEASE; MOUSE MODEL; PROTEIN; NEURONS; VULNERABILITY; EXPRESSION; DEATH	Public Health Agency of Canada; University of Manitoba	5	Acta Neuropathol. Commun.	NOV 9	2022	10.1186/s40478-022-01450-4	Neurosciences	Neurosciences & Neurology
scRNA-seq	Celiac disease	human	peripheral blood	undisclosed	Ramírez-Sánchez, AD; Chu, XJ; Modderman, R; Kooy-Winkelaar, Y; Koletzko, S; Korponay-Szabó, IR; Troncone, R; Wijmenga, C; Mearin, L; Withoff, S; Jonkers, IH; Li, Y	Ramirez-Sanchez, Aaron D.; Chu, Xiaojing; Modderman, Rutger; Kooy-Winkelaar, Yvonne; Koletzko, Sibylle; Korponay-Szabo, Ilma R.; Troncone, Riccardo; Wijmenga, Cisca; Mearin, Luisa; Withoff, Sebo; Jonkers, Iris H.; Li, Yang	Single-Cell RNA Sequencing of Peripheral Blood Mononuclear Cells From Pediatric Coeliac Disease Patients Suggests Potential Pre-Seroconversion Markers	FRONTIERS IN IMMUNOLOGY	celiac disease; scRNAseq; PBMC; differential gene expression; pre-diagnostic biomarkers	T-CELLS; KAPPA-B; MULTIPLE-SCLEROSIS; CLINICAL-FEATURES; EXPRESSION; GENES; DIAGNOSIS; COMMON; TISSUE; PATHOGENESIS	University of Groningen; Leiden University; Leiden University Medical Center (LUMC); University of Munich; University of Warmia & Mazury; University of Debrecen; University of Debrecen; University of Naples Federico II; University of Naples Federico II; Radboud University Nijmegen; Radboud University Nijmegen	5	Front. Immunol.	MAR 15	2022	10.3389/fimmu.2022.843086	Immunology	Immunology
scRNA-seq	Alexander disease	mice	hippocampus, cortex	GSE242666	Saito, K; Shigetomi, E; Shinozaki, Y; Kobayashi, K; Parajuli, B; Kubota, Y; Sakai, K; Miyakawa, M; Horiuchi, H; Nabekura, J; Koizumi, S	Saito, Kozo; Shigetomi, Eiji; Shinozaki, Youichi; Kobayashi, Kenji; Parajuli, Bijay; Kubota, Yuto; Sakai, Kent; Miyakawa, Miho; Horiuchi, Hiroshi; Nabekura, Junichi; Koizumi, Schuichi	Microglia sense astrocyte dysfunction and prevent disease progression in an Alexander disease model	BRAIN	Alexander disease; astrocyte-microglia interactions; microglial ca(2+) signal; two-photon imaging; single-cell RNA sequencing	NEURONAL NMDA RECEPTORS; NEUROPATHIC PAIN; ACTIVATION; PROTEIN; PHENOTYPE; ONSET; ADP; ATP; NEURODEGENERATION; TRANSCRIPTOME	University of Yamanashi; University of Yamanashi; National Institutes of Natural Sciences (NINS) - Japan; National Institute for Physiological Sciences (NIPS); University of Yamanashi	4	Brain	FEB 1	2024	10.1093/brain/awad358	Clinical Neurology; Neurosciences	Neurosciences & Neurology
scRNA-seq	neuromyelitis optica spectrum disorders	mice	peripheral blood	HRA004613	Qin, C; Chen, M; Dong, MH; Yang, S; Zhang, H; You, YF; Zhou, LQ; Chu, YH; Tang, Y; Pang, XW; Wu, LJ; Tian, DS; Wang, W	Qin, Chuan; Chen, Man; Dong, Ming-Hao; Yang, Sheng; Zhang, Hang; You, Yun-Fan; Zhou, Luo-Qi; Chu, Yun-Hui; Tang, Yue; Pang, Xiao-Wei; Wu, Long-Jun; Tian, Dai-Shi; Wang, Wei	Soluble TREM2 triggers microglial dysfunction in neuromyelitis optica spectrum disorders	BRAIN	neuromyelitis optica spectrum disorders; soluble TREM2; microglia	CEREBROSPINAL-FLUID; MULTIPLE-SCLEROSIS; ALZHEIMERS-DISEASE; CLEAVAGE; INJURY; STREM2	Huazhong University of Science & Technology; Huazhong University of Science & Technology; Mayo Clinic	4	Brain	JAN 4	2024	10.1093/brain/awad321	Clinical Neurology; Neurosciences	Neurosciences & Neurology
scRNA-seq	multiple sclerosis	human	postmortem brain	GSE230828, GSE196953, GSE180670	Jamann, H; Desu, HL; Cui, QL; Halaweh, A; Tastet, O; Klement, W; Zandee, S; Pernin, F; Mamane, VH; Ouedraogo, O; Daigneault, A; Sidibé, H; Millette, F; Peelen, E; Dhaeze, T; Hoornaert, C; Rébillard, RM; Thai, K; Grasmuck, C; Vande Velde, C; Prat, A; Arbour, N; Stratton, JA; Antel, J; Larochelle, C	Jamann, Helene; Desu, Haritha L.; Cui, Qiao-Ling; Halaweh, Alexandre; Tastet, Olivier; Klement, Wendy; Zandee, Stephanie; Pernin, Florian; Mamane, Victoria H.; Ouedraogo, Oumarou; Daigneault, Audrey; Sidibe, Hadjara; Millette, Florence; Peelen, Evelyn; Dhaeze, Tessa; Hoornaert, Chloe; Rebillard, Rose-Marie; Thai, Karine; Grasmuck, Camille; Vande Velde, Christine; Prat, Alexandre; Arbour, Nathalie…	ALCAM on human oligodendrocytes mediates CD4 T cell adhesion	BRAIN	oligodendrocytes; multiple sclerosis; Th17 cells; ALCAM; MCAM	BLOOD-BRAIN-BARRIER; MULTIPLE-SCLEROSIS; DEMYELINATED AXONS; CYTOKINE RECEPTORS; DUAL ROLE; MOLECULE; LYMPHOCYTES; EXPRESSION; MELANOMA; PROMOTES	Universite de Montreal; Universite de Montreal; McGill University; McGill University; Universite de Montreal	4	Brain	JAN 4	2024	10.1093/brain/awad286	Clinical Neurology; Neurosciences	Neurosciences & Neurology
scRNA-seq	Alzheimer’s disease	mice	postmortem brain	GSE230116	Zhou, JH; Singh, N; Galske, J; Hudobenko, J; Hu, XY; Yan, RQ	Zhou, John; Singh, Neeraj; Galske, James; Hudobenko, Jacob; Hu, Xiangyou; Yan, Riqiang	BACE1 regulates expression of Clusterin in astrocytes for enhancing clearance of β-amyloid peptides	MOLECULAR NEURODEGENERATION	BACE1; Amyloid plaques; Reactive astrocytes; Clusterin; CXCL14; Insulin receptor; A beta clearance	GENOME-WIDE ASSOCIATION; ALZHEIMERS-DISEASE; IDENTIFIES VARIANTS; PRECURSOR PROTEIN; MOSSY FIBER; KNOCK-OUTS; ADULT; BRAIN; NEURODEGENERATION; POTENTIATION	Cleveland Clinic Foundation; University System of Ohio; Case Western Reserve University; Cleveland Clinic Foundation	4	Mol. Neurodegener.	MAY 4	2023	10.1186/s13024-023-00611-w	Neurosciences	Neurosciences & Neurology
scRNA-seq	Amyotrophic lateral sclerosis	mice	cortex	GSE206330	Filipi, T; Matusova, Z; Abaffy, P; Vanatko, O; Tureckova, J; Benesova, S; Kubiskova, M; Kirdajova, D; Zahumensky, J; Valihrach, L; Anderova, M	Filipi, Tereza; Matusova, Zuzana; Abaffy, Pavel; Vanatko, Ondrej; Tureckova, Jana; Benesova, Sarka; Kubiskova, Monika; Kirdajova, Denisa; Zahumensky, Jakub; Valihrach, Lukas; Anderova, Miroslava	Cortical glia in SOD1(G93A) mice are subtly affected by ALS-like pathology	SCIENTIFIC REPORTS		AMYOTROPHIC-LATERAL-SCLEROSIS; MOTOR-NEURON DEGENERATION; TRANSGENIC MOUSE MODEL; DIFFERENTIAL EXPRESSION; GENE-EXPRESSION; SPINAL-CORD; MICROGLIA; DISEASE; ASTROCYTES; ACTIVATION	Czech Academy of Sciences; Institute of Experimental Medicine of the Czech Academy of Sciences; Charles University Prague; Czech Academy of Sciences; Institute of Biotechnology of the Czech Academy of Sciences; Charles University Prague; University of Chemistry & Technology, Prague; Czech Academy of Sciences; Institute of Experimental Medicine of the Czech Academy of Sciences	4	Sci Rep	APR 21	2023	10.1038/s41598-023-33608-y	Multidisciplinary Sciences	Science & Technology - Other Topics
scRNA-seq	Parkinson’s disease	mice	hippocampus	PRJNA899134	Jia, ER; Sheng, YQ; Shi, HJ; Wang, Y; Zhou, Y; Liu, ZY; Qi, T; Pan, M; Bai, YF; Zhao, XW; Ge, QY	Jia, Erteng; Sheng, Yuqi; Shi, Huajuan; Wang, Ying; Zhou, Ying; Liu, Zhiyu; Qi, Ting; Pan, Min; Bai, Yunfei; Zhao, Xiangwei; Ge, Qinyu	Spatial Transcriptome Profiling of Mouse Hippocampal Single Cell Microzone in Parkinson's Disease	INTERNATIONAL JOURNAL OF MOLECULAR SCIENCES	single-cell RNA-seq; spatial transcriptome; Parkinson's disease; hippocampus	DEMENTIA; MEMORY; IMPAIRMENT; MECHANISMS; DOPAMINE; BEHAVIOR; SNAP-25; LOOP	Southeast University - China; Xuzhou Medical University; Southeast University - China	4	Int. J. Mol. Sci.	FEB	2023	10.3390/ijms24031810	Biochemistry & Molecular Biology; Chemistry, Multidisciplinary	Biochemistry & Molecular Biology; Chemistry
scRNA-seq	multiple sclerosis	mice	postmortem brain	GSE212852	Skinner, DD; Syage, AR; Olivarria, GM; Stone, C; Hoglin, B; Lane, TE	Skinner, Dominic D.; Syage, Amber R.; Olivarria, Gema M.; Stone, Colleen; Hoglin, Bailey; Lane, Thomas E.	Sustained Infiltration of Neutrophils Into the CNS Results in Increased Demyelination in a Viral-Induced Model of Multiple Sclerosis	FRONTIERS IN IMMUNOLOGY	neutrophils; neuroinflammation; chemokines; chemokine receptors; coronavirus	CENTRAL-NERVOUS-SYSTEM; MURINE CORONAVIRUS INFECTION; T-CELLS; MACROPHAGE INFILTRATION; CHEMOKINE EXPRESSION; INDUCIBLE PROTEIN-10; REACTIVE OXYGEN; HOST-DEFENSE; IFN-GAMMA; INFLAMMATION	Utah System of Higher Education; University of Utah; University of California System; University of California Irvine; University of California System; University of California Irvine; University of California System; University of California Irvine	4	Front. Immunol.	SEP 29	2022	10.3389/fimmu.2022.931388	Immunology	Immunology
scRNA-seq	multiple sclerosis	human	peripheral blood	PRJNA776659	Liu, J; Yang, XY; Pan, JL; Wei, ZH; Liu, PD; Chen, M; Liu, HB	Liu, Ju; Yang, Xiaoyan; Pan, Jiali; Wei, Zhihua; Liu, Peidong; Chen, Min; Liu, Hongbo	Single-Cell Transcriptome Profiling Unravels Distinct Peripheral Blood Immune Cell Signatures of RRMS and MOG Antibody-Associated Disease	FRONTIERS IN NEUROLOGY	RRMS; MOGAD; peripheral blood; single-cell RNA sequencing; biomarker	MULTIPLE-SCLEROSIS; AUTOIMMUNE-DISEASE; MYELOID CELLS; T-CELLS; MONOCYTES; SUBSETS; RESPONSES; THERAPY	Zhengzhou University; Zhengzhou University	4	Front. Neurol.	JAN 14	2022	10.3389/fneur.2021.807646	Clinical Neurology; Neurosciences	Neurosciences & Neurology
scRNA-seq	neuroinflammation	human	human iPSCs	GSE138525	Sorek, M; Oweis, W; Nissim-Rafinia, M; Maman, M; Simon, S; Hession, CC; Adiconis, X; Simmons, SK; Sanjana, NE; Shi, X; Lu, CY; Pan, JQ; Xu, XH; Pouladi, MA; Ellerby, LM; Zhang, F; Levin, JZ; Meshorer, E	Sorek, Matan; Oweis, Walaa; Nissim-Rafinia, Malka; Maman, Moria; Simon, Shahar; Hession, Cynthia C.; Adiconis, Xian; Simmons, Sean K.; Sanjana, Neville E.; Shi, Xi; Lu, Congyi; Pan, Jen Q.; Xu, Xiaohong; Pouladi, Mahmoud A.; Ellerby, Lisa M.; Zhang, Feng; Levin, Joshua Z.; Meshorer, Eran	Pluripotent stem cell-derived models of neurological diseases reveal early transcriptional heterogeneity	GENOME BIOLOGY	Transcriptional heterogeneity; Single cell; scRNA-seq; Neurological diseases; Neurodegenerative diseases; Huntington’ s disease; Pluripotent stem cells; Stem cell model; Smart-seq2	GENE-EXPRESSION; HUNTINGTON DISEASE; NOISE; AGGREGATION; PROFILIN; KINETICS; TARGETS; DAMAGE	Hebrew University of Jerusalem; Hebrew University of Jerusalem; Harvard University; Massachusetts Institute of Technology (MIT); Broad Institute; Harvard University; Massachusetts Institute of Technology (MIT); Broad Institute; Harvard University; Massachusetts Institute of Technology (MIT); Broad Institute; Massachusetts Institute of Technology (MIT); New York University; New York University; Ji…	4	Genome Biol.	MAR 4	2021	10.1186/s13059-021-02301-6	Biotechnology & Applied Microbiology; Genetics & Heredity	Biotechnology & Applied Microbiology; Genetics & Heredity
scRNA-seq	Parkinson’s disease	human	peripheral blood	GSE237254	Capelle, CM; Ciré, S; Hedin, F; Hansen, M; Pavelka, L; Grzyb, K; Kyriakis, D; Hunewald, O; Konstantinou, M; Revets, D; Tslaf, V; Marques, TM; Gomes, CPC; Baron, A; Domingues, O; Gomez, M; Zeng, N; Betsou, F; May, P; Skupin, A; Cosma, A; Balling, R; Krüger, R; Ollert, M; Hefeng, FQ	Capelle, Christophe M.; Cire, Severine; Hedin, Fanny; Hansen, Maxime; Pavelka, Lukas; Grzyb, Kamil; Kyriakis, Dimitrios; Hunewald, Oliver; Konstantinou, Maria; Revets, Dominique; Tslaf, Vera; Marques, Taina M.; Gomes, Clarissa P. C.; Baron, Alexandre; Domingues, Olivia; Gomez, Mario; Zeng, Ni; Betsou, Fay; May, Patrick; Skupin, Alexander; Cosma, Antonio; Balling, Rudi; Krueger, Rejko; Ollert, Mar…	Early-to-mid stage idiopathic Parkinson's disease shows enhanced cytotoxicity and differentiation in CD8 T-cells in females	NATURE COMMUNICATIONS		INNATE LYMPHOID-CELLS; NATURAL-KILLER-CELL; CYTOMEGALOVIRUS-INFECTION; MITOCHONDRIAL DYSFUNCTION; CEREBROSPINAL-FLUID; GENE-EXPRESSION; SEX-DIFFERENCES; FACTOR-I; MEMORY; EFFECTOR	Luxembourg Institute of Health; University of Luxembourg; Luxembourg Institute of Health; University of Luxembourg; Luxembourg Hospital Center; Luxembourg Institute of Health; Luxembourg Institute of Health; Pasteur Network; Universite Paris Cite; Institut Pasteur Paris; University of Luxembourg; University of California System; University of California San Diego; University of Bonn; University o…	3	Nat. Commun.	NOV 20	2023	10.1038/s41467-023-43053-0	Multidisciplinary Sciences	Science & Technology - Other Topics
scRNA-seq	Alzheimer’s disease	mice	hippocampus	PXD041709, GSE230240	Jang, J; Yeo, SE; Baek, S; Jung, HJ; Lee, MS; Choi, SH; Choe, Y	Jang, Jaemyung; Yeo, Seungeun; Baek, Soonbong; Jung, Hyun Jin; Lee, Mi Suk; Choi, Seung Hee; Choe, Youngshik	Abnormal accumulation of extracellular vesicles in hippocampal dystrophic axons and regulation by the primary cilia in Alzheimer's disease	ACTA NEUROPATHOLOGICA COMMUNICATIONS	Dystrophic neurites; Primary cilia; Hippocampal septal connection; Extracellular vesicles; Single cell RNA sequencing; Selectively vulnerable neurons	AMYLOID PRECURSOR PROTEIN; MULTIVESICULAR BODIES; ENTORHINAL CORTEX; TRANSGENIC MICE; CEREBRAL-CORTEX; SLOW-ONSET; BETA; NEURONS; NEURODEGENERATION; SOMATOSTATIN	Korea Brain Research Institute (KBRI)	3	Acta Neuropathol. Commun.	SEP 4	2023	10.1186/s40478-023-01637-3	Neurosciences	Neurosciences & Neurology
scRNA-seq	neuroinflammation	human	postmortem brain	GSE211701	Govek, KW; Chen, SX; Sgourdou, P; Yao, Y; Woodhouse, S; Chen, TF; Fuccillo, MV; Epstein, DJ; Camara, PG	Govek, Kiya W.; Chen, Sixing; Sgourdou, Paraskevi; Yao, Yao; Woodhouse, Steven; Chen, Tingfang; Fuccillo, Marc V.; Epstein, Douglas J.; Camara, Pablo G.	Developmental trajectories of thalamic progenitors revealed by single-cell transcriptome	CELL REPORTS		SONIC HEDGEHOG; GENE-EXPRESSION; INTERGENICULATE LEAFLET; REGULATORY GENES; MOUSE; IDENTITY; NUCLEI; ORGANIZATION; NEURONS; ORIGIN	University of Pennsylvania; University of Pennsylvania; University System of Georgia; University of Georgia; University of Pennsylvania	3	Cell Reports	DEC 6	2022	10.1016/j.celrep.2022.111768	Cell Biology	Cell Biology
scRNA-seq	neuroinflammation	human	dorsolateral prefrontal cortex	GSE138525	Lee, J; Villarreal, OD; Wang, YC; Ragoussis, J; Rivest, S; Gosselin, D; Richard, S	Lee, Jeesan; Villarreal, Oscar David; Wang, Yu Chang; Ragoussis, Jiannis; Rivest, Serge; Gosselin, David; Richard, Stephane	PRMT1 is required for the generation of MHC-associated microglia and remyelination in the central nervous system	LIFE SCIENCE ALLIANCE		INNATE IMMUNE-RESPONSES; ARGININE METHYLATION; HISTONE H4; IN-VIVO; MACROPHAGE; CUPRIZONE; MOUSE	McGill University; Lady Davis Institute; McGill University; McGill University; McGill University; McGill University; Laval University; Laval University	3	Life Sci. Alliance	OCT	2022	10.26508/lsa.202201467	Biology	Life Sciences & Biomedicine - Other Topics
scRNA-seq	Alzheimer’s disease	mice	postmortem brain	GSE235527	Sun, PY; Liu, J; Hu, JN; Tu, YF; Jiang, Q; Jia, YJ; Sun, HL; Chen, SH; Xin, JY; Yu, ZY; Liu, ZH; Tan, CR; Zeng, GH; Shi, AY; Liu, YH; Bu, XL; Wang, YJ; Wang, J	Sun, Pu-Yang; Liu, Jie; Hu, Jian-Ni; Tu, Yun-Feng; Jiang, Qiu; Jia, Yu-Juan; Sun, Hao-Lun; Chen, Si-Han; Xin, Jia-Yan; Yu, Zhong-Yuan; Liu, Zhi-Hao; Tan, Cheng-Rong; Zeng, Gui-Hua; Shi, An-Yu; Liu, Yu-Hui; Bu, Xian-Le; Wang, Yan-Jiang; Wang, Jun	Rejuvenation of peripheral immune cells attenuates Alzheimer's disease-like pathologies and behavioral deficits in a mouse model	SCIENCE ADVANCES		CLEARANCE; INSIGHTS	Army Medical University; Army Medical University; North Sichuan Medical University; Army Medical University; Chinese Academy of Sciences; Center for Excellence in Brain Science and Intelligence Technology, CAS	2	Sci. Adv.	MAY 29	2024	10.1126/sciadv.adl1123	Multidisciplinary Sciences	Science & Technology - Other Topics
scRNA-seq	Alzheimer’s disease	mice	postmortem brain	GSE233601	Yin, T; Yesiltepe, M; D'Adamio, L	Yin, Tao; Yesiltepe, Metin; D'Adamio, Luciano	Functional BRI2-TREM2 interactions in microglia: implications for Alzheimer's and related dementias	EMBO REPORTS	ITM2B; microglia; Trem2; Alzheimer Disease; Phagocytosis	BETA-PRECURSOR PROTEIN; AMYLOID-BETA; FAMILIAL BRITISH; MEMORY DEFICITS; MYELOID CELLS-2; TREM2; GENE; MUTATION; DISEASE; BINDS	Rutgers University System; Rutgers University New Brunswick; Rutgers University Newark	2	EMBO Rep.	MAR 12	2024	10.1038/s44319-024-00077-x	Biochemistry & Molecular Biology; Cell Biology	Biochemistry & Molecular Biology; Cell Biology
scRNA-seq	neuroinflammation	mice	retinas	undisclosed	Chen, BL; Zou, J; Xie, LH; Cai, YJ; Li, BW; Tan, W; Huang, JHH; Li, FL; Xu, HZ	Chen, Bolin; Zou, Jing; Xie, Lihui; Cai, Yinjun; Li, Bowen; Tan, Wei; Huang, Jinhaohao; Li, Fangling; Xu, Huizhuo	WNT-inhibitory factor 1-mediated glycolysis protects photoreceptor cells in diabetic retinopathy	JOURNAL OF TRANSLATIONAL MEDICINE	Diabetic retinopathy; Photoreceptor cell; Retinal neuronal degeneration; Wnt-inhibitory factor 1; Glycolysis	APOPTOSIS; PATHWAY; RETINA; GROWTH; MODEL	Central South University; Central South University	2	J. Transl. Med.	MAR 6	2024	10.1186/s12967-024-05046-5	Medicine, Research & Experimental	Research & Experimental Medicine
scRNA-seq	Alzheimer’s disease	human	peripheral blood	PRJNA1067365	Cuni-Lopez, C; Stewart, R; Oikari, LE; Nguyen, TH; Roberts, TL; Sun, YF; Guo, CC; Lupton, MK; White, AR; Quek, H	Cuni-Lopez, Carla; Stewart, Romal; Oikari, Lotta E.; Nguyen, Tam Hong; Roberts, Tara L.; Sun, Yifan; Guo, Christine C.; Lupton, Michelle K.; White, Anthony R.; Quek, Hazel	Advanced patient-specific microglia cell models for pre-clinical studies in Alzheimer's disease	JOURNAL OF NEUROINFLAMMATION	Microglia; Monocytes; Patient; Alzheimer's disease; 3D cell modeling; Drugs	INFLAMMATORY RESPONSE; BONE-MARROW; PROGRESSION; EXPRESSION; CLEARANCE; PHENOTYPE; REVEALS; MOUSE	QIMR Berghofer Medical Research Institute; University of Queensland; University of Queensland; Queensland University of Technology (QUT); University of Queensland; QIMR Berghofer Medical Research Institute; Western Sydney University; Ingham Institute for Applied Medical Research; Western Sydney University	2	J. Neuroinflamm.	FEB 15	2024	10.1186/s12974-024-03037-3	Immunology; Neurosciences	Immunology; Neurosciences & Neurology
scRNA-seq	neuroinflammation	human	human iPSCs	GSE226081	Ramaswami, G; Yuva-Aydemir, Y; Akerberg, B; Matthews, B; Williams, J; Golczer, G; Huang, JQ; Al Abdullatif, A; Huh, D; Burkly, LC; Engle, SJ; Sehgal, A; Sigova, AA; Fremeau , RT Jr; Liu, YT; Bumcrot, D	Ramaswami, Gokul; Yuva-Aydemir, Yeliz; Akerberg, Brynn; Matthews, Bryan; Williams, Jenna; Golczer, Gabriel; Huang, Jiaqi; Al Abdullatif, Ali; Huh, Dann; Burkly, Linda C.; Engle, Sandra J.; Sehgal, Alfica; Sigova, Alla A.; Fremeau Jr, Robert T.; Liu, Yuting; Bumcrot, David	Transcriptional characterization of iPSC-derived microglia as a model for therapeutic development in neurodegeneration	SCIENTIFIC REPORTS		PLURIPOTENT STEM-CELLS; LIVER-X-RECEPTOR; DIFFERENTIATION; BRAIN; SALL1	Biogen	2	Sci Rep	JAN 25	2024	10.1038/s41598-024-52311-0	Multidisciplinary Sciences	Science & Technology - Other Topics
scRNA-seq	Alzheimer’s disease	mice	hippocampus	PRJNA1017614, PRJNA1018595	Siew, JJ; Chen, HM; Chiu, FL; Lee, CW; Chang, YM; Chen, HL; Nguyen, TNA; Liao, HT; Liu, MY; Hagar, HT; Sun, YC; Lai, HL; Kuo, MH; Blum, D; Buee, L; Jin, LW; Chen, SY; Ko, TM; Huang, JR; Kuo, HC; Liu, FT; Chern, Y	Siew, Jian Jing; Chen, Hui-Mei; Chiu, Feng-Lan; Lee, Chia-Wei; Chang, Yao-Ming; Chen, Hung-Lin; Nguyen, Thi Ngoc Anh; Liao, Hung-Ting; Liu, Mengyu; Hagar, Hsiao-Tien; Sun, Yung-Chen; Lai, Hsing-Lin; Kuo, Min-Hao; Blum, David; Buee, Luc; Jin, Lee-Way; Chen, Shih-Yu; Ko, Tai-Ming; Huang, Jie-Rong; Kuo, Hung-Chih; Liu, Fu-Tong; Chern, Yijuang	Galectin-3 aggravates microglial activation and tau transmission in tauopathy	JOURNAL OF CLINICAL INVESTIGATION		ALZHEIMERS-DISEASE; MOUSE; DEFICITS; RECEPTOR; DRIVES	Academia Sinica - Taiwan; Academia Sinica - Taiwan; Michigan State University; National Yang Ming Chiao Tung University; Universite de Lille; CHU Lille; Institut National de la Sante et de la Recherche Medicale (Inserm); Universite de Lille; University of California System; University of California Davis; National Yang Ming Chiao Tung University	2	J. Clin. Invest.	JAN 16	2024	10.1172/JCI165523	Medicine, Research & Experimental	Research & Experimental Medicine
scRNA-seq	Parkinson’s disease	human	human iPSCs	GSE247600, GSE249360	Cardo, LF; Monzón-Sandoval, J; Li, ZZ; Webber, C; Li, M	Cardo, Lucia F.; Monzon-Sandoval, Jimena; Li, Zongze; Webber, Caleb; Li, Meng	Single-Cell Transcriptomics and In Vitro Lineage Tracing Reveals Differential Susceptibility of Human iPSC-Derived Midbrain Dopaminergic Neurons in a Cellular Model of Parkinson's Disease	CELLS	CRISPR/Cas9; midbrain dopaminergic neuron; genome editing; human pluripotent stem cell; in vitro differentiation; Parkinson's disease; single-cell RNA sequencing	EMBRYONIC STEM-CELLS; VENTRAL MIDBRAIN; SUBSTANTIA-NIGRA; GENE-EXPRESSION; CAUDAL LIMIT; PROGENITORS; MOUSE; SPECIFICATION; HYBRIDIZATION; GENERATION	Cardiff University; Cardiff University	2	Cells	DEC	2023	10.3390/cells12242860	Cell Biology	Cell Biology
scRNA-seq	Parkinson’s disease	mice	midbrain	GSE197679	Geng, L; Gao, WQ; Saiyin, H; Li, YY; Zeng, Y; Zhang, ZF; Li, X; Liu, ZL; Gao, Q; An, P; Jiang, N; Yu, XF; Chen, XJ; Li, SH; Chen, L; Lu, BX; Li, AQ; Chen, GY; Shen, YD; Zhang, HB; Tian, M; Zhang, ZH; Li, JX	Geng, Lu; Gao, Wenqing; Saiyin, Hexige; Li, Yuanyuan; Zeng, Yu; Zhang, Zhifei; Li, Xue; Liu, Zuolong; Gao, Qiang; An, Ping; Jiang, Ning; Yu, Xiaofei; Chen, Xiangjun; Li, Suhua; Chen, Lei; Lu, Boxun; Li, Aiqun; Chen, Guoyuan; Shen, Yidong; Zhang, Haibing; Tian, Mei; Zhang, Zhuohua; Li, Jixi	MLKL deficiency alleviates neuroinflammation and motor deficits in the α-synuclein transgenic mouse model of Parkinson's disease	MOLECULAR NEURODEGENERATION	Parkinson's disease; MLKL; Tg-Mlkl(-/-) mice; Neuroinflammation; scRNA-seq	NECROPTOSIS; GENE; AGGREGATION; ACTIVATION; DEATH	Fudan University; Fudan University; Fudan University; Shanghai Jiao Tong University; Fudan University; Fudan University; Duke Kunshan University; Chinese Academy of Sciences; Center for Excellence in Molecular Cell Science, CAS; Chinese Academy of Sciences; Shanghai Institute of Nutrition & Health, CAS; Fudan University; Central South University; University of South China	2	Mol. Neurodegener.	DEC 1	2023	10.1186/s13024-023-00686-5	Neurosciences	Neurosciences & Neurology
scRNA-seq	Parkinson’s disease	zebrafish	postmortem brain	undisclosed	Wang, XT; Yang, X; He, WF; Zhang, SX; Song, X; Zhang, JR; Ma, JX; Chen, L; Niu, PY; Chen, T	Wang, Xueting; Yang, Xin; He, Weifeng; Zhang, Shixuan; Song, Xin; Zhang, Junrou; Ma, Junxiang; Chen, Li; Niu, Piye; Chen, Tian	Single-cell transcriptomics analysis of zebrafish brain reveals adverse effects of manganese on neurogenesis	ENVIRONMENTAL POLLUTION	Manganese; Zebrafish; Neurogenesis; Single-cell transcriptomics analysis	NEURAL STEM-CELLS; ALPHA-SYNUCLEIN; OXIDATIVE STRESS; EXPOSURE; DEATH; MODEL; AGGREGATION; ACTIVATION; APOPTOSIS; PROTECTS	Capital Medical University; Capital Medical University	2	Environ. Pollut.	JAN 15	2024	10.1016/j.envpol.2023.122908	Environmental Sciences	Environmental Sciences & Ecology
scRNA-seq	Alzheimer’s disease	mice	hippocampus	undisclosed	Lou, K; Liu, SD; Zhang, FX; Sun, WX; Su, XH; Bi, WK; Yin, QQ; Qiu, YX; Zhang, ZY; Jing, MZ; Ma, SZ	Lou, Kai; Liu, Shudong; Zhang, Fengxia; Sun, Wenxiu; Su, Xinhuan; Bi, Wenkai; Yin, Qingqing; Qiu, Yaxin; Zhang, Zhenyuan; Jing, Mengzhe; Ma, Shizhan	The effect of hyperthyroidism on cognitive function, neuroinflammation, and necroptosis in APP/PS1 mice	JOURNAL OF TRANSLATIONAL MEDICINE	Alzheimer's disease; Graves' disease; Single cell RNA-sequencing; Neuroinflammation; Necroptosis	LONG-TERM MODEL; THYROID-DYSFUNCTION; ALZHEIMERS-DISEASE; GRAVES-DISEASE; ACTIVATION; DEMENTIA; CELL; TRIIODOTHYRONINE; PEPTIDES; NECROSIS	Shandong First Medical University & Shandong Academy of Medical Sciences; Shandong University of Traditional Chinese Medicine; Shandong First Medical University & Shandong Academy of Medical Sciences; Shandong First Medical University & Shandong Academy of Medical Sciences; Shandong First Medical University & Shandong Academy of Medical Sciences	2	J. Transl. Med.	SEP 22	2023	10.1186/s12967-023-04511-x	Medicine, Research & Experimental	Research & Experimental Medicine
scRNA-seq	multiple sclerosis	mice	cerebral spinal fluid and blood	undisclosed	Nuesslein-Hildesheim, B; Ferrero, E; Schmid, C; Huck, C; Smith, P; Tisserand, S; Rubert, J; Bornancin, F; Eichlisberger, D; Cenni, B	Nuesslein-Hildesheim, Barbara; Ferrero, Enrico; Schmid, Cindy; Huck, Catherine; Smith, Paul; Tisserand, Sarah; Rubert, Joelle; Bornancin, Frederic; Eichlisberger, Denis; Cenni, Bruno	Remibrutinib (LOU064) inhibits neuroinflammation driven by B cells and myeloid cells in preclinical models of multiple sclerosis	JOURNAL OF NEUROINFLAMMATION	Multiple sclerosis; BTK; Remibrutinib; LOU064; Autoimmunity; Neuroinflammation	BRUTONS TYROSINE KINASE; INDUCTION; MICROGLIA; ENCEPHALOMYELITIS; RITUXIMAB; EFFICACY; DISEASE; PROTEIN; POTENT	Novartis	2	J. Neuroinflamm.	AUG 26	2023	10.1186/s12974-023-02877-9	Immunology; Neurosciences	Immunology; Neurosciences & Neurology
scRNA-seq	multiple sclerosis	human	cerebral spinal fluid	GSE194078	Kang, J; Kim, M; Yoon, D; Kim, WS; Choi, SJ; Kwon, YN; Kim, WS; Park, SH; Sung, JJ; Park, M; Lee, JS; Park, JE; Kim, SM	Kang, Junho; Kim, Moonhang; Yoon, Da-Young; Kim, Woo-Seok; Choi, Seok-Jin; Kwon, Young-Nam; Kim, Won-Seok; Park, Sung-Hye; Sung, Jung-Joon; Park, Myungsun; Lee, Jung Seok; Park, Jong-Eun; Kim, Sung-Min	AXL+SIGLEC6+dendritic cells in cerebrospinal fluid and brain tissues of patients with autoimmune inflammatory demyelinating disease of CNS	CLINICAL IMMUNOLOGY	Inflammatory demyelinating disease; AXL+SIGLEC6+dendritic cell; Single-cell RNA sequencing	CENTRAL-NERVOUS-SYSTEM; HUMAN DENDRITIC CELLS; MULTIPLE-SCLEROSIS; DIAGNOSTIC-CRITERIA; THERAPEUTIC TARGETS; PROGNOSTIC VALUE; T-CELLS; EXPRESSION; LAMP3; DIFFERENTIATION	Korea Advanced Institute of Science & Technology (KAIST); Seoul National University (SNU); Seoul National University Hospital; Seoul National University (SNU); Seoul National University (SNU); Seoul National University Hospital; Seoul National University (SNU); Seoul National University Hospital	2	Clin. Immunol.	AUG	2023	10.1016/j.clim.2023.109686	Immunology	Immunology
scRNA-seq	neuroinflammation	mice	postmortem brain	GSE217665	Little, K; Singh, A; Del Marco, A; Llorián-Salvador, M; Vargas-Soria, M; Turch-Anguera, M; Solé, M; Bakker, N; Scullion, S; Comella, JX; Klaassen, I; Simó, R; Garcia-Alloza, M; Tiwari, VK; Stitt, AW	Little, Karis; Singh, Aditi; Del Marco, Angel; Llorian-Salvador, Maria; Vargas-Soria, Maria; Turch-Anguera, Mireia; Sole, Montse; Bakker, Noelle; Scullion, Sarah; Comella, Joan X.; Klaassen, Ingeborg; Simo, Rafael; Garcia-Alloza, Monica; Tiwari, Vijay K.; Stitt, Alan W.	Disruption of cortical cell type composition and function underlies diabetes-associated cognitive decline	DIABETOLOGIA	Cognitive decline; Cortex; Diabetes; Metabolism; Neuroscience; Neurovascular unit	ALZHEIMERS-DISEASE; CENTRAL PATHOLOGY; MIXED-MODEL; IMPAIRMENT; MICE; LEPTIN	Queens University Belfast; Universidad de Cadiz; Autonomous University of Barcelona; Autonomous University of Barcelona; Hospital Universitari Vall d'Hebron; Vall d'Hebron Institut de Recerca (VHIR); Autonomous University of Barcelona; Hospital Universitari Vall d'Hebron; Vall d'Hebron Institut de Recerca (VHIR); Autonomous University of Barcelona; Autonomous University of Barcelona; CIBER - Cent…	2	Diabetologia	AUG	2023	10.1007/s00125-023-05935-2	Endocrinology & Metabolism	Endocrinology & Metabolism
scRNA-seq	neuroinflammation	human	human iPSCs	https://www.ncbi.nlm.nih.gov/bioproject/846149	Galiakberova, AA; Brovkina, OI; Kondratyev, NV; Artyuhov, AS; Momotyuk, ED; Kulmukhametova, ON; Lagunin, AA; Shilov, BV; Zadorozhny, AD; Zakharov, IS; Okorokova, LS; Golimbet, VE; Dashinimaev, EB	Galiakberova, Adelya Albertovna; Brovkina, Olga Igorevna; Kondratyev, Nikolay Vitalyevich; Artyuhov, Alexander Sergeevich; Momotyuk, Ekaterina Dmitrievna; Kulmukhametova, Olga Nikolaevna; Lagunin, Alexey Aleksandrovich; Shilov, Boris Vladimirovich; Zadorozhny, Anton Dmitrievich; Zakharov, Igor Sergeevitch; Okorokova, Larisa Sergeevna; Golimbet, Vera Evgenievna; Dashinimaev, Erdem Bairovich	Different iPSC-derived neural stem cells shows various spectrums of spontaneous differentiation during long term cultivation	FRONTIERS IN MOLECULAR NEUROSCIENCE	iPSC; neural stem cells; sc-RNA-seq; neural culture; differentiation	HUMAN ES; NEURONS; NEUROGENESIS; INHIBITION; ASTROCYTES; EXPRESSION; GENERATION; INDUCTION; EXPANSION; PLATFORM	Pirogov Russian National Research Medical University; Lomonosov Moscow State University; Pirogov Russian National Research Medical University; Russian Academy of Medical Sciences; Institute of Biomedical Chemistry; Russian Academy of Sciences; Koltzov Institute of Developmental Biology of the Russian Academy of Sciences; Moscow Institute of Physics & Technology	2	Front. Molec. Neurosci.	MAY 2	2023	10.3389/fnmol.2023.1037902	Neurosciences	Neurosciences & Neurology
scRNA-seq	multiple sclerosis	human	cerebral spinal fluid and blood	GSE227954	Müller-Miny, L; Heming, M; Lautwein, T; Ruck, T; Lu, IN; Wiendl, H; Hörste, GMZ	Mueller-Miny, Louisa; Heming, Michael; Lautwein, Tobias; Ruck, Tobias; Lu, I-Na; Wiendl, Heinz; Hoerste, Gerd Meyer Zu	Alemtuzumab treatment exemplifies discordant immune effects of blood and cerebrospinal fluid in multiple sclerosis	JOURNAL OF NEUROIMMUNOLOGY	Alemtuzumab; Single cell RNA sequencing; Multiple sclerosis	MECHANISM	University of Munster; Heinrich Heine University Dusseldorf; Heinrich Heine University Dusseldorf; University of Munster	2	J. Neuroimmunol.	MAY 15	2023	10.1016/j.jneuroim.2023.578088	Immunology; Neurosciences	Immunology; Neurosciences & Neurology
scRNA-seq	neuroinflammation	mice	postmortem brain	undisclosed	Chen, ZY; Islam, MBAR; Ford, KP; Zhao, GY; Chen, SY; Wang, YD; Davis, BTT IV; Mentis, AFA; Schwulst, SJ	Chen, Zhangying; Islam, Mecca B. A. R.; Ford, Kacie P.; Zhao, Guangyuan; Chen, Shang-Yang; Wang, Yidan; Davis, Booker T. T., IV; Mentis, Alexios-Fotios A.; Schwulst, Steven J.	MICROGLIA AND INFILTRATING T-CELLS ADOPT LONG-TERM, AGE-SPECIFIC, TRANSCRIPTIONAL CHANGES AFTER TRAUMATIC BRAIN INJURY IN MICE	SHOCK	Microglia; T cells; single-cell RNA sequencing; aging; traumatic brain injury	NEUROINFLAMMATION; NEURODEGENERATION; HETEROGENEITY; IMPAIRMENT; MEMORY; STATES	Northwestern University; Feinberg School of Medicine; Northwestern University; Feinberg School of Medicine; Northwestern University; Feinberg School of Medicine; National & Kapodistrian University of Athens; Northwestern University; Feinberg School of Medicine	2	Shock	FEB	2023	10.1097/SHK.0000000000002027	Critical Care Medicine; Hematology; Surgery; Peripheral Vascular Disease	General & Internal Medicine; Hematology; Surgery; Cardiovascular System & Cardiology
scRNA-seq	tuberous sclerosis complex		peripheral blood, tumor	PRJCA011152	Wang, Z; Liu, XY; Wang, WD; Wei, J; Seery, S; Xu, JY; Sun, HD; Yu, YC; Zhao, Y; Wang, X; Liao, ZC; Li, YN; Sun, W; Jia, LL; Zhang, YS	Wang, Zhan; Liu, Xiaoyan; Wang, Wenda; Wei, Jing; Seery, Samuel; Xu, Jiyu; Sun, Haidan; Yu, Yuncui; Zhao, Yang; Wang, Xu; Liao, Zhangcheng; Li, Yanan; Sun, Wei; Jia, Lulu; Zhang, Yushi	A multi-omics study of diagnostic markers and the unique inflammatory tumor micro-environment involved in tuberous sclerosis complex-related renal angiomyolipoma	INTERNATIONAL JOURNAL OF ONCOLOGY	tuberous sclerosis complex; proteomics; diagnostic markers; tumor microenvironment; UPLC-MS; RNA transcriptome	EXPRESSION; MORTALITY; LESIONS	Chinese Academy of Medical Sciences - Peking Union Medical College; Peking Union Medical College; Peking Union Medical College Hospital; Chinese Academy of Medical Sciences - Peking Union Medical College; Capital Medical University; Chinese Academy of Medical Sciences - Peking Union Medical College; Peking Union Medical College; Lancaster University; Capital Medical University; Chinese Academy of…	2	Int. J. Oncol.	NOV	2022	10.3892/ijo.2022.5422	Oncology	Oncology
scRNA-seq	Parkinson’s disease	mice	substantia nigra	PRJNA756542	Khan, AH; Lee, LK; Smith, DJ	Khan, Arshad H.; Lee, Lydia K.; Smith, Desmond J.	Single-cell analysis of gene expression in the substantia nigra pars compacta of a pesticide-induced mouse model of Parkinson's disease	TRANSLATIONAL NEUROSCIENCE	basal ganglia; maneb; paraquat; neurodegeneration; scRNA-seq	SET ENRICHMENT ANALYSIS; MITOCHONDRIAL DYSFUNCTION; WEB SERVER; EXPOSURE; TRANSCRIPTOMICS; NEURODEGENERATION; STRESS; RISK	University of California System; University of California Los Angeles; University of California Los Angeles Medical Center; David Geffen School of Medicine at UCLA; University of California System; University of California Los Angeles; University of California Los Angeles Medical Center; David Geffen School of Medicine at UCLA	2	Transl. Neurosci.	SEP 1	2022	10.1515/tnsci-2022-0237	Neurosciences	Neurosciences & Neurology
scRNA-seq	Alzheimer’s disease	mice	postmortem brain	GSE203311	Mei, F; Hu, JP; Wu, ZY; Zhang, GZ; Liu, AH; Li, X; Zhu, ML; Gan, YY; Liang, L; Zhao, XY; Yuan, YY; Meng, XY; Li, Y; Jin, Y; Jia, JP; Yin, YX	Mei, Fan; Hu, Jiapan; Wu, Zhongyan; Zhang, Guangze; Liu, Anhang; Li, Xiang; Zhu, Minglu; Gan, Yangyang; Liang, Ling; Zhao, Xuyang; Yuan, Yuyao; Meng, Xiangyan; Li, Yang; Jin, Yan; Jia, Jianping; Yin, Yuxin	FAM69C, a kinase critical for synaptic function and memory, is defective in neurodegenerative dementia	CELL REPORTS		ALZHEIMERS-DISEASE	Peking University; Peking University; Capital Medical University	2	Cell Reports	JUL 19	2022	10.1016/j.celrep.2022.111101	Cell Biology	Cell Biology
scRNA-seq	Parkinson’s disease	mice	thalamus, substantia nigra, hippocampus	undisclosed	Weng, YL; Zhang, Y; Li, YH; Lin, XP; Guo, ZK; Hu, H; Shao, WY; Yu, GX; Zheng, FL; Cai, P; Li, HY; Wu, SY	Weng, Yali; Zhang, Yu; Li, Yinhan; Lin, Xinpei; Guo, Zhenkun; Hu, Hong; Shao, Wenya; Yu, Guangxia; Zheng, Fuli; Cai, Ping; Li, Huangyuan; Wu, Siying	Single-cell RNA-sequencing of cellular heterogeneity and pathogenic mechanisms in paraquat-induced Parkinson's disease with depression	ECOTOXICOLOGY AND ENVIRONMENTAL SAFETY	Parkinson 's disease; Depression; Single -cell RNA sequencing; Cellular heterogeneity; Glutamatergic cluster	NEUREGULIN-1; PLASTICITY	Fujian Medical University; Fujian Medical University; Fujian Medical University; Fujian Medical University	1	Ecotox. Environ. Safe.	MAR 15	2024	10.1016/j.ecoenv.2024.116169	Environmental Sciences; Toxicology	Environmental Sciences & Ecology; Toxicology
scRNA-seq	Alzheimer’s disease, Parkinson’s disease	mice	postmortem brain	GSE227157	Fatmi, MK; Wang, H; Slotabec, L; Wen, CH; Seale, B; Zhao, B; Li, J	Fatmi, Mohammad Kasim; Wang, Hao; Slotabec, Lily; Wen, Changhong; Seale, Blaise; Zhao, Bi; Li, Ji	Single-Cell RNA-seq reveals transcriptomic modulation of Alzheimer's disease by activated protein C	AGING-US	APC; Alzheimer's disease; inflammation	CATHEPSIN-B; AMYLOID-BETA; TRANSGENIC MICE; MOUSE MODEL; WILD-TYPE; DYSFUNCTION; EXPRESSION; BIOMARKERS; MICROGLIA; PATHOLOGY	State University System of Florida; University of South Florida; University of Mississippi Medical Center; University of Mississippi; State University System of Florida; University of South Florida	1	Aging-US	FEB 28	2024		Cell Biology; Geriatrics & Gerontology	Cell Biology; Geriatrics & Gerontology
scRNA-seq	Amyotrophic lateral sclerosis, frontotemporal dementia	mice	spinal cord, brain cortex, spleen	GSE252888	Limone, F; Couto, A; Wang, JY; Zhang, YY; Mccourt, B; Huang, C; Minkin, A; Jani, M; Mcneer, S; Keaney, J; Gillet, G; Lopez-Gonzalez, R; Goodman, WA; Kadiu, I; Eggan, K; Burberry, A	Limone, Francesco; Couto, Alexander; Wang, Jin-Yuan; Zhang, Yingying; Mccourt, Blake; Huang, Cerianne; Minkin, Adina; Jani, Marghi; Mcneer, Sarah; Keaney, James; Gillet, Gaelle; Lopez-Gonzalez, Rodrigo; Goodman, Wendy A.; Kadiu, Irena; Eggan, Kevin; Burberry, Aaron	Myeloid and lymphoid expression of C9orf72 regulates IL-17A signaling in mice	SCIENCE TRANSLATIONAL MEDICINE		AMYOTROPHIC-LATERAL-SCLEROSIS; AUTOIMMUNE-DISEASE; CELL-DEVELOPMENT; GENE-EXPRESSION; MECHANISMS; ACTIVATION; BREAKDOWN; EXPANSION; TOXICITY; BARRIER	Harvard University; Harvard University; Massachusetts Institute of Technology (MIT); Broad Institute; Harvard University; Leiden University; Leiden University Medical Center (LUMC); Leiden University - Excl LUMC; University System of Ohio; Case Western Reserve University; Cleveland Clinic Foundation	1	Sci. Transl. Med.	JAN 31	2024	10.1126/scitranslmed.adg7895	Cell Biology; Medicine, Research & Experimental	Cell Biology; Research & Experimental Medicine
scRNA-seq	multiple sclerosis	mice	meningeal ectopic lymphoid tissue, secondary lymphoid organs	GSE181526, GSE182774	Diddens, J; Lepennetier, G; Friedrich, V; Schmidt, M; Brand, RM; Georgieva, T; Hemmer, B; Lehmann-Horn, K	Diddens, Jolien; Lepennetier, Gildas; Friedrich, Verena; Schmidt, Monika; Brand, Rosa M.; Georgieva, Tanya; Hemmer, Bernhard; Lehmann-Horn, Klaus	Single-Cell Profiling Indicates a Proinflammatory Role of Meningeal Ectopic Lymphoid Tissue in Experimental Autoimmune Encephalomyelitis	NEUROLOGY-NEUROIMMUNOLOGY & NEUROINFLAMMATION		CORTICAL DEMYELINATION; DISEASE; INFLAMMATION; ANTIBODIES; FOLLICLES; PATHOLOGY; PLAYS	Technical University of Munich; University of Munich	1	Neurol.-Neuroimmunol. Neuroinflammation	JAN	2024	10.1212/NXI.0000000000200185	Clinical Neurology; Neurosciences	Neurosciences & Neurology
scRNA-seq	multiple sclerosis	human	cerebral spinal fluid	EGAS00001007478	Ban, MR; Bredikhin, D; Huang, YH; Bonder, MJ; Katarzyna, K; Oliver, AJ; Wilson, NK; Coupland, P; Hadfield, J; Göttgens, B; Madissoon, E; Stegle, O; Sawcer, S	Ban, Maria; Bredikhin, Danila; Huang, Yuanhua; Bonder, Marc Jan; Katarzyna, Kania; Oliver, Amanda J.; Wilson, Nicola K.; Coupland, Paul; Hadfield, James; Goettgens, Berthold; Madissoon, Elo; Stegle, Oliver; Sawcer, Stephen	Expression profiling of cerebrospinal fluid identifies dysregulated antiviral mechanisms in multiple sclerosis	BRAIN	multiple sclerosis; scRNA-seq; eQTL; CSF; ZC3HAV1; IFITM2	CELLS; MACROPHAGES; DIFFERENTIATION; POLARIZATION; VIRUSES; IFITM2	University of Cambridge; European Molecular Biology Laboratory (EMBL); Helmholtz Association; German Cancer Research Center (DKFZ); European Molecular Biology Laboratory (EMBL); University of Cambridge; CRUK Cambridge Institute; Wellcome Trust Sanger Institute; University of Cambridge; University of Cambridge; University of Hong Kong; University of Groningen; University of Cambridge	1	Brain	FEB 1	2024	10.1093/brain/awad404	Clinical Neurology; Neurosciences	Neurosciences & Neurology
scRNA-seq	Alzheimer’s disease	mice	postmortem brain, lung, liver	GSE185642, GSE185642	Yu, M; Nie, YG; Yang, JW; Yang, SL; Li, R; Rao, VR; Hu, XY; Fang, C; Li, SM; Song, DP; Guo, FY; Snyder, MP; Chang, HY; Kuo, CJ; Xu, J; Chang, JL	Yu, Min; Nie, Yage; Yang, Jiawen; Yang, Shilun; Li, Rui; Rao, Varsha; Hu, Xiaoyan; Fang, Cheng; Li, Simeng; Song, Dengpan; Guo, Fuyou; Snyder, Michael P.; Chang, Howard Y.; Kuo, Calvin J.; Xu, Jin; Chang, Junlei	Integrative multi-omic profiling of adult mouse brain endothelial cells and potential implications in Alzheimer's disease	CELL REPORTS		TRANSCRIPTION FACTOR; BARRIER INTEGRITY; CNS; EXPRESSION; PERICYTES; DIFFERENTIATION; GROWTH; ATLAS	Chinese Academy of Sciences; Shenzhen Institute of Advanced Technology, CAS; Sun Yat Sen University; Sun Yat Sen University; Stanford University; Stanford University; Zhengzhou University; Stanford University; Howard Hughes Medical Institute; Stanford University	1	Cell Reports	NOV 28	2023	10.1016/j.celrep.2023.113392	Cell Biology	Cell Biology
scRNA-seq	Alzheimer’s disease	mice	hippocampus	GSE230240, GSE237776, PXD043328	Yeo, S; Jang, J; Jung, HJ; Lee, H; Choe, Y	Yeo, Seungun; Jang, Jaemyung; Jung, Hyun Jin; Lee, Hyeyoung; Choe, Youngshik	Primary cilia-mediated regulation of microglial secretion in Alzheimer's disease	FRONTIERS IN MOLECULAR BIOSCIENCES	microglia; primary cilia; extracellular vesicles; amyloid-beta; Alzheimer's disease	EXTRACELLULAR VESICLES; IMMUNE SYNAPSE; BRAIN; ACTIVATION; RECEPTORS; NEURODEGENERATION; MACROPHAGES; SIGNATURE; MIGRATION; TRANSPORT	Korea Brain Research Institute (KBRI); Dong-Eui University	1	Front. Mol. Biosci.	OCT 23	2023	10.3389/fmolb.2023.1250335	Biochemistry & Molecular Biology	Biochemistry & Molecular Biology
scRNA-seq	neuroinflammation	mice	peripheral blood, kidney	undisclosed	Huang, BY; Huang, ZZ; Wang, HK; Zhu, GQ; Liao, H; Wang, ZW; Yang, BX; Ran, JH	Huang, Boyue; Huang, Zhizhen; Wang, Hongkai; Zhu, Guoqi; Liao, Hui; Wang, Zhiwen; Yang, Baoxue; Ran, Jianhua	High urea induces anxiety disorders associated with chronic kidney disease by promoting abnormal proliferation of OPC in amygdala	EUROPEAN JOURNAL OF PHARMACOLOGY	Urea; Chronic kidney disease; Anxiety; Oligodendrocytes; Amygdala	STRESS; BRAIN; CULTURE; DEFECT; MICE	Chongqing Medical University; Chongqing Medical University; Peking University; Peking University; Northwestern University; Chongqing Medical University; Chongqing Medical University	1	Eur. J. Pharmacol.	OCT 15	2023	10.1016/j.ejphar.2023.175905	Pharmacology & Pharmacy	Pharmacology & Pharmacy
scRNA-seq	multiple sclerosis	mice	cerebral spinal fluid	E-MTAB-12942	Hansson, C; Lebrero-Fernández, C; Schön, K; Angeletti, D; Lycke, N	Hansson, Charlotta; Lebrero-Fernandez, Cristina; Schon, Karin; Angeletti, Davide; Lycke, Nils	Tr1 cell-mediated protection against autoimmune disease by intranasal administration of a fusion protein targeting cDC1 cells	MUCOSAL IMMUNOLOGY		REGULATORY T-CELLS; CENTRAL-NERVOUS-SYSTEM; KINASE-C INHIBITOR; DENDRITIC CELLS; II COLLAGEN; RHEUMATOID-ARTHRITIS; CHOLESTEROL ACCUMULATION; MULTIPLE-SCLEROSIS; VACCINE ADJUVANT; BASIC-PROTEIN	University of Gothenburg	1	Mucosal Immunol.	AUG	2023	10.1016/j.mucimm.2023.05.006	Immunology	Immunology
scRNA-seq	neuroinflammation	human	lower esophageal sphincter	HRA002791	Liu, ZQ; Dai, H; Yao, L; Chen, WF; Wang, Y; Ma, LY; Li, XQ; Lin, SL; He, MJ; Gao, PT; Liu, XY; Xu, JX; Xu, XY; Wang, KH; Wang, L; Chen, LA; Zhou, PH; Li, QL	Liu, Zu-Qiang; Dai, Hao; Yao, Lu; Chen, Wei-Feng; Wang, Yun; Ma, Li-Yun; Li, Xiao-Qing; Lin, Sheng-Li; He, Meng-Jiang; Gao, Ping-Ting; Liu, Xin-Yang; Xu, Jia-Xin; Xu, Xiao-Yue; Wang, Ke-Hao; Wang, Li; Chen, Luonan; Zhou, Ping-Hong; Li, Quan-Lin	A single-cell transcriptional landscape of immune cells shows disease-specific changes of T cell and macrophage populations in human achalasia	NATURE COMMUNICATIONS		MESSENGER-RNA; MICROGLIA; PATHWAY; NEURODEGENERATION; ALZHEIMERS; REVEALS; DETECTS; DRIVES	Fudan University; Fudan University; Chinese Academy of Sciences; Center for Excellence in Molecular Cell Science, CAS; Chinese Academy of Sciences; University of Chinese Academy of Sciences, CAS; ShanghaiTech University	1	Nat. Commun.	AUG 4	2023	10.1038/s41467-023-39750-5	Multidisciplinary Sciences	Science & Technology - Other Topics
scRNA-seq	experimental autoimmune encephalomyelitis	mice	spinal cord	GSE195888	Zheng, YX; Chen, ZY; Zhou, BQ; Chen, SY; Chen, ND; Shen, LS	Zheng, Yingxia; Chen, Zheyi; Zhou, Bingqian; Chen, Shiyu; Chen, Ningdai; Shen, Lisong	Prmt5 deficiency inhibits CD4+T-cell Klf2/S1pr1 expression and ameliorates EAE disease	JOURNAL OF NEUROINFLAMMATION	Prmt5; S1pr1; Klf2; Migration; EAE; CD4+T	ARGININE METHYLTRANSFERASE 5; T-CELLS; MULTIPLE-SCLEROSIS; INFLAMMATION; RESPONSES; CANCER	Shanghai Jiao Tong University; Shanghai Jiao Tong University	1	J. Neuroinflamm.	AUG 2	2023	10.1186/s12974-023-02854-2	Immunology; Neurosciences	Immunology; Neurosciences & Neurology
scRNA-seq	Alzheimer’s disease	human	peripheral blood	https://fair.addi.ad-datainitiative.org/#/data/datasets/single_cell_rna_seq_data_derived_from_mapt_carriers_and_controls	Sirkis, DW; Solsberg, CW; Johnson, TP; Bonham, LW; Sturm, VE; Lee, S; Rankin, KP; Rosen, HJ; Boxer, AL; Seeley, WW; Miller, BL; Geier, EG; Yokoyama, JS	Sirkis, Daniel W.; Solsberg, Caroline Warly; Johnson, Taylor P.; Bonham, Luke W.; Sturm, Virginia E.; Lee, Suzee E.; Rankin, Katherine P.; Rosen, Howard J.; Boxer, Adam L.; Seeley, William W.; Miller, Bruce L.; Geier, Ethan G.; Yokoyama, Jennifer S.	Single-cell RNA-seq reveals alterations in peripheral CX3CR1 and nonclassical monocytes in familial tauopathy	GENOME MEDICINE	Tau; Tauopathy; MAPT; CX3CR1; Dementia; Neurodegeneration; Nonclassical monocytes; Microglia; PBMCs; Single-cell RNA-seq	DISEASE-ASSOCIATED MICROGLIA; TAU PATHOLOGY; ALZHEIMERS-DISEASE; ACTIVATION; BRAIN; NEURODEGENERATION; DEGENERATION; ASSOCIATION; FRACTALKINE; RECEPTOR	University of California System; University of California San Francisco; University of California System; University of California San Francisco; University of California System; University of California San Francisco; University of California System; University of California San Francisco; Trinity College Dublin; University of California System; University of California San Francisco	1	Genome Med.	JUL 18	2023	10.1186/s13073-023-01205-3	Genetics & Heredity	Genetics & Heredity
scRNA-seq	Alzheimer’s disease	drosophila	postmortem brain	syn35798807	Wu, T; Deger, JM; Ye, H; Guo, CW; Dhindsa, J; Pekarek, BT; Al-Ouran, R; Liu, ZD; Al-Ramahi, I; Botas, J; Shulman, JM	Wu, Timothy; Deger, Jennifer M.; Ye, Hui; Guo, Caiwei; Dhindsa, Justin; Pekarek, Brandon T.; Al-Ouran, Rami; Liu, Zhandong; Al-Ramahi, Ismael; Botas, Juan; Shulman, Joshua M.	Tau polarizes an aging transcriptional signature to excitatory neurons and glia	ELIFE		RNA-SEQ DATA; ALZHEIMERS-DISEASE; GENE-EXPRESSION; NEUROFIBRILLARY TANGLES; AMYLOID-BETA; DROSOPHILA; BRAIN; NEURODEGENERATION; PLASTICITY; MICROGLIA	Baylor College of Medicine; Baylor College of Medicine; Baylor College of Medicine; Baylor College of Medicine; Baylor College of Medicine; Baylor College of Medicine; Baylor College of Medicine; Stanford University	1	eLife	MAY 23	2023	10.7554/eLife.85251	Biology	Life Sciences & Biomedicine - Other Topics
scRNA-seq	Alzheimer’s disease	mice	hippocampus	undisclosed	Shen, ML; Shang, MJ; Tian, RF; Hu, Y; Han, Q; Hu, JF; An, GZ; Wang, BX; Cao, Z; Lin, XY; Yang, H; Xing, JL	Shen, Meilun; Shang, Mengjuan; Tian, Ruofei; Hu, Yang; Han, Qian; Hu, Junfeng; An, Guangzhou; Wang, Bingxia; Cao, Zhi; Lin, Xiaoyu; Yang, Hao; Xing, Junling	Single cell molecular alterations reveal target cells and pathways of conditioned fear memory	BRAIN RESEARCH	Single cell RNA sequencing; Conditioned fear memory; Hippocampus; Alzheimer?s disease; Auditory stimuli	LONG-TERM POTENTIATION; SYNAPTIC-TRANSMISSION; DENTATE-GYRUS; HIPPOCAMPUS; ALZHEIMERS; EXPRESSION; CORTEX; GENE; PROJECTIONS; NUCLEUS	Air Force Military Medical University; Air Force Military Medical University; Air Force Military Medical University; Chinese People's Liberation Army General Hospital; Southern Theater Command General Hospital; Shanghai Jiao Tong University	1	Brain Res.	MAY 15	2023	10.1016/j.brainres.2023.148309	Neurosciences	Neurosciences & Neurology
scRNA-seq	multiple sclerosis	human	peripheral blood	undisclosed	Teschner, VE; Fleck, AK; Walter, C; Schwarze, AS; Eschborn, M; Wirth, T; Steinberg, OV; Schulte-Mecklenbeck, A; Lu, IN; Herrera-Rivero, M; Janoschka, C; Lünemann, JD; Schwab, N; zu Hörste, GM; Varghese, J; Gross, CC; Pul, R; Kleinschnitz, C; Mader, S; Meinl, E; Stoll, M; Wiendl, H; Klotz, L	Teschner, Valerie E.; Fleck, Ann-Katrin; Walter, Carolin; Schwarze, Anna-Sophie; Eschborn, Melanie; Wirth, Timo; Steinberg, Olga V.; Schulte-Mecklenbeck, Andreas; Lu, I-Na; Herrera-Rivero, Marisol; Janoschka, Claudia; Luenemann, Jan D.; Schwab, Nicholas; zu Hoerste, Gerd Meyer; Varghese, Julian; Gross, Catharina C.; Pul, Refik; Kleinschnitz, Christoph; Mader, Simone; Meinl, Edgar; Stoll, Monika; …	Single-cell profiling reveals preferential reduction of memory B cell subsets in cladribine patients that correlates with treatment response	THERAPEUTIC ADVANCES IN NEUROLOGICAL DISORDERS	cladribine; memory B cells; multiple sclerosis	MULTIPLE-SCLEROSIS; DEOXYCYTIDINE	University of Munster; University of Munster; University of Munster; University of Duisburg Essen; University of Munich; University of Munich	1	Ther. Adv. Neurol. Disord.		2023	10.1177/17562864231211077	Clinical Neurology	Neurosciences & Neurology
scRNA-seq	Huntingtons’ diseases	human	skin	undisclosed	Liao, BY; Ouyang, QY; Song, HQ; Wang, ZQ; Ou, JH; Huang, JX; Liu, L	Liao, Bingye; Ouyang, Qiuyi; Song, Hongqin; Wang, Ziqi; Ou, Jinhua; Huang, Jinxin; Liu, Liang	Characteristic analysis of skin keratinocytes in patients with type 2 diabetes based on the single-cell levels	CHINESE MEDICAL JOURNAL	Diabetes mellitus; type 2; Gene Ontology; Keratinocytes; Prion diseases; Sequence analysis; RNA; Single-cell analysis; Transcriptome; Wound healing	RECEPTOR; S100A9; GENES	Sun Yat Sen University; Southern Medical University - China	1	Chin. Med. J.	OCT 20	2022	10.1097/CM9.0000000000002323	Medicine, General & Internal	General & Internal Medicine
scRNA-seq	neuroinflammation	mice	hippocampus, cortex	GSE247339, GSE180862	Zhang, GL; Diamante, G; Ahn, IS; Palafox-Sanchez, V; Cheng, JY; Cheng, MC; Ying, Z; Wang, SSM; Abuhanna, KD; Phi, N; Arneson, D; Cely, I; Arellano, K; Wang, N; Zhang, SJ; Peng, C; Gomez-Pinilla, F; Yang, X	Zhang, Guanglin; Diamante, Graciel; Ahn, In Sook; Palafox-Sanchez, Victoria; Cheng, Jenny; Cheng, Michael; Ying, Zhe; Wang, Susanna Sue-Ming; Abuhanna, Kevin Daniel; Phi, Nguyen; Arneson, Douglas; Cely, Ingrid; Arellano, Kayla; Wang, Ning; Zhang, Shujing; Peng, Chao; Gomez-Pinilla, Fernando; Yang, Xia	Thyroid hormone T4 mitigates traumatic brain injury in mice by dynamically remodeling cell type specific genes, pathways, and networks in hippocampus and frontal cortex	BIOCHIMICA ET BIOPHYSICA ACTA-MOLECULAR BASIS OF DISEASE	Mild traumatic brain injury (mTBI); Thyroxine (T4); Single cell RNA sequencing (scRNA-seq); Genome-wide association study (GWAS); hippocampus; Frontal cortex	MODEL; MECHANISMS; EXPRESSION; MILD; RAT; NEUROINFLAMMATION; COMMUNICATION; PATHOGENESIS; CYCLOPHILIN; PROTEIN	University of California System; University of California Los Angeles; University of California System; University of California Los Angeles; University of California System; University of California Los Angeles; University of California System; University of California Los Angeles; University of California Los Angeles Medical Center; David Geffen School of Medicine at UCLA; University of Califor…	0	Biochim. Biophys. Acta-Mol. Basis Dis.	DEC	2024	10.1016/j.bbadis.2024.167344	Biochemistry & Molecular Biology; Biophysics; Cell Biology	Biochemistry & Molecular Biology; Biophysics; Cell Biology
scRNA-seq	multiple sclerosis	mice	spleen	GSE261605	Deffenbaugh, JL; Jung, KJ; Murphy, SP; Liu, Y; Rau, CN; Petersen-Cherubini, CL; Collins, PL; Chung, DJ; Lovett-Racke, AE	Deffenbaugh, Joshua L.; Jung, Kyeong-Joo; Murphy, Shawn P.; Liu, Yue; Rau, Christina N.; Petersen-Cherubini, Cora L.; Collins, Patrick L.; Chung, Dongjun; Lovett-Racke, Amy E.	Novel model of multiple sclerosis induced by EBV-like virus generates a unique B cell population	JOURNAL OF NEUROIMMUNOLOGY	Epstein-Barr virus; Multiple sclerosis; Experimental autoimmune encephalomyelitis; MHV68; Gammaherpesvirus; B cells		University System of Ohio; Ohio State University; University System of Ohio; Ohio State University; University System of Ohio; Ohio State University; University System of Ohio; Ohio State University; University System of Ohio; Ohio State University; University System of Ohio; Ohio State University	0	J. Neuroimmunol.	SEP 15	2024	10.1016/j.jneuroim.2024.578408	Immunology; Neurosciences	Immunology; Neurosciences & Neurology
scRNA-seq	multiple sclerosis, experimental autoimmune encephalomyelitis	mice	lymph nodes	undisclosed	Quan, MY; Zhang, HN; Han, XX; Ba, YB; Cui, XY; Bi, YW; Yi, L; Li, B	Quan, Moyuan; Zhang, Huining; Han, Xianxian; Ba, Yongbing; Cui, Xiaoyang; Bi, Yanwei; Yi, Le; Li, Bin	Single-Cell RNA Sequencing Reveals Transcriptional Landscape of Neutrophils and Highlights the Role of TREM-1 in EAE	NEUROLOGY-NEUROIMMUNOLOGY & NEUROINFLAMMATION		AUTOIMMUNE ENCEPHALOMYELITIS; MULTIPLE-SCLEROSIS; LYMPH-NODES; STEM	Hebei Medical University; Hebei Medical University; Hebei Medical University	0	Neurol.-Neuroimmunol. Neuroinflammation	SEP	2024	10.1212/NXI.0000000000200278	Clinical Neurology; Neurosciences	Neurosciences & Neurology
scRNA-seq	Huntington’s disease	human	brain organoids	GSE272271	Galimberti, M; Nucera, MR; Bocchi, VD; Conforti, P; Vezzoli, E; Cereda, M; Maffezzini, C; Iennaco, R; Scolz, A; Falqui, A; Cordiglieri, C; Cremona, M; Espuny-Camacho, I; Faedo, A; Felsenfeld, DP; Vogt, TF; Ranzani, V; Zuccato, C; Besusso, D; Cattaneo, E	Galimberti, Maura; Nucera, Maria R.; Bocchi, Vittoria D.; Conforti, Paola; Vezzoli, Elena; Cereda, Matteo; Maffezzini, Camilla; Iennaco, Raffaele; Scolz, Andrea; Falqui, Andrea; Cordiglieri, Chiara; Cremona, Martina; Espuny-Camacho, Ira; Faedo, Andrea; Felsenfeld, Dan P.; Vogt, Thomas F.; Ranzani, Valeria; Zuccato, Chiara; Besusso, Dario; Cattaneo, Elena	Huntington's disease cellular phenotypes are rescued non-cell autonomously by healthy cells in mosaic telencephalic organoids	NATURE COMMUNICATIONS		MUTANT HUNTINGTIN; MOTOR DYSFUNCTION; MOUSE MODEL; IN-VIVO; EXPRESSION; RNA; ABNORMALITIES; DEFICITS; REVEALS; CILIA	University of Milan; University of Milan; Murdoch Children's Research Institute; Memorial Sloan Kettering Cancer Center; Vita-Salute San Raffaele University; IRCCS Ospedale San Raffaele; University of Liege	0	Nat. Commun.	AUG 2	2024	10.1038/s41467-024-50877-x	Multidisciplinary Sciences	Science & Technology - Other Topics
scRNA-seq;snATAC-seq;ISO-seq(isoform-sequencing)	Parkinson’s disease	mice	postmortem brain	undisclosed	Zhuo, Y; Li, WS; Lu, W; Li, X; Ge, LT; Huang, Y; Gao, QT; Deng, YJ; Jiang, XC; Lan, ZW; Deng, Q; Chen, YH; Xiao, Y; Lu, S; Jiang, F; Liu, Z; Hu, L; Liu, Y; Ding, Y; He, ZW; Tan, DA; Duan, D; Lu, M	Zhuo, Yi; Li, Wen-Shui; Lu, Wen; Li, Xuan; Ge, Li-Te; Huang, Yan; Gao, Qing-Tao; Deng, Yu-Jia; Jiang, Xin-Chen; Lan, Zi-Wei; Deng, Que; Chen, Yong-Heng; Xiao, Yi; Lu, Shuo; Jiang, Feng; Liu, Zuo; Hu, Li; Liu, Yu; Ding, Yu; He, Zheng-Wen; Tan, De-An; Duan, Da; Lu, Ming	TGF-β1 mediates hypoxia-preconditioned olfactory mucosa mesenchymal stem cells improved neural functional recovery in Parkinson's disease models and patients	MILITARY MEDICAL RESEARCH	Parkinson's disease (PD); Hypoxia-preconditioned; Olfactory mucosa mesenchymal stem cells (OM-MSCs); Transforming growth factor-beta 1 (TGF-beta 1); Microglia; PI3K/Akt signaling pathway; Immune regulation; Autophagy	DOPAMINERGIC-NEURONS; T-CELLS; MICROGLIA; DIFFERENTIATION; TRANSPLANTATION; INFILTRATION; THERAPY; RANTES	Hunan Normal University; Central South University; Hunan Normal University; Central South University; Changsha Medical University	0	MILITARY MED. RES.	JUL 22	2024	10.1186/s40779-024-00550-7	Medicine, General & Internal	General & Internal Medicine
scRNA-seq	Parkinson’s disease	mice and human	postmortem brain, human PCs	GSE115571, GSE256105, GSE254687, EGAD50000000291	Mogensen, FLH; Sousa, C; Ameli, C; Badanjak, K; Pereira, SL; Muller, A; Kaoma, T; Coowar, D; Scafidi, A; Poovathingal, SK; Tziortziou, M; Antony, PMA; Nicot, N; Ginolhac, A; Weisenhorn, DMV; Wurst, W; Poli, A; Nazarov, PV; Skupin, A; Grünewald, A; Michelucci, A	Mogensen, Frida Lind-Holm; Sousa, Carole; Ameli, Corrado; Badanjak, Katja; Pereira, Sandro L.; Muller, Arnaud; Kaoma, Tony; Coowar, Djalil; Scafidi, Andrea; Poovathingal, Suresh K.; Tziortziou, Maria; Antony, Paul M. A.; Nicot, Nathalie; Ginolhac, Aurelien; Weisenhorn, Daniela M. Vogt; Wurst, Wolfgang; Poli, Aurelie; Nazarov, Petr V.; Skupin, Alexander; Gruenewald, Anne; Michelucci, Alessandro	PARK7/DJ-1 deficiency impairs microglial activation in response to LPS-induced inflammation	JOURNAL OF NEUROINFLAMMATION	PARK7/DJ-1; Lipopolysaccharide; Microglia; Neuroinflammation; Parkinson's disease; Microglia morphology	PARKINSONS-DISEASE; DJ-1-DEFICIENT MICE; OXIDIZED DJ-1; PROTEIN; PROFILE; RISK; PET	Luxembourg Institute of Health; University of Luxembourg; International Iberian Nanotechnology Laboratory; University of Luxembourg; University of Luxembourg; Luxembourg Institute of Health; University of Luxembourg; Flanders Institute for Biotechnology (VIB); KU Leuven; University of Luxembourg; University of Luxembourg; Helmholtz Association; Helmholtz-Center Munich - German Research Center for…	0	J. Neuroinflamm.	JUL 16	2024	10.1186/s12974-024-03164-x	Immunology; Neurosciences	Immunology; Neurosciences & Neurology
scRNA-seq;scATAC-seq	neuroinflammation	mice and human	cell cultures	GSE206175, GSE206304, GSE206607	Thakore, PI; Schnell, A; Huang, LL; Zhao, MY; Hou, Y; Christian, E; Zaghouani, S; Wang, C; Singh, V; Singaraju, A; Krishnan, RK; Kozoriz, D; Ma, S; Sankar, V; Notarbartolo, S; Buenrostro, JD; Sallusto, F; Patsopoulos, NA; Rozenblatt-Rosen, O; Kuchroo, VK; Regev, A	Thakore, Pratiksha I.; Schnell, Alexandra; Huang, Linglin; Zhao, Maryann; Hou, Yu; Christian, Elena; Zaghouani, Sarah; Wang, Chao; Singh, Vasundhara; Singaraju, Anvita; Krishnan, Rajesh Kumar; Kozoriz, Deneen; Ma, Sai; Sankar, Venkat; Notarbartolo, Samuele; Buenrostro, Jason D.; Sallusto, Federica; Patsopoulos, Nikolaos A.; Rozenblatt-Rosen, Orit; Kuchroo, Vijay K.; Regev, Aviv	BACH2 regulates diversification of regulatory and proinflammatory chromatin states in TH17 cells	NATURE IMMUNOLOGY		DIFFERENTIAL EXPRESSION ANALYSIS; T-CELLS; TH17 CELLS; SINGLE-CELL; TRANSCRIPTION FACTORS; NEGATIVE REGULATOR; SUPER-ENHANCERS; RNA-SEQ; DISEASE; ACCESSIBILITY	Harvard University; Massachusetts Institute of Technology (MIT); Broad Institute; Harvard University; Massachusetts General Hospital; Brigham & Women's Hospital; Harvard University; Harvard Medical School; Harvard University; Dana-Farber Cancer Institute; Harvard University; Harvard T.H. Chan School of Public Health; Harvard University; Universita della Svizzera Italiana; Harvard University; Mass…	0	Nat. Immunol.	AUG	2024	10.1038/s41590-024-01901-1	Immunology	Immunology
scRNA-seq	multiple sclerosis	human	cerebral spinal fluid	PRJNA866296, GSE163005, GSE138266, GSE234069, https://doi.org/10.17632/wvzt8t9dw8.1	Deffner, M; Schneider-Hohendorf, T; Schulte-Mecklenbeck, A; Falk, S; Lu, IN; Ostkamp, P; Müller-Miny, L; Schumann, EM; Goelz, S; Cahir-McFarland, E; Thakur, KT; De Jager, PL; Klotz, L; Hörste, GMZ; Gross, CC; Wiendl, H; Grauer, OM; Schwab, N	Deffner, Marie; Schneider-Hohendorf, Tilman; Schulte-Mecklenbeck, Andreas; Falk, Simon; Lu, I-Na; Ostkamp, Patrick; Mueller-Miny, Louisa; Schumann, Eva Maria; Goelz, Susan; Cahir-McFarland, Ellen; Thakur, Kiran T.; De Jager, Philip L.; Klotz, Luisa; Hoerste, Gerd Meyer zu; Gross, Catharina C.; Wiendl, Heinz; Grauer, Oliver M.; Schwab, Nicholas	Chemokine-mediated cell migration into the central nervous system in progressive multifocal leukoencephalopathy	CELL REPORTS MEDICINE		RECONSTITUTION INFLAMMATORY SYNDROME; JC VIRUS; MULTIPLE-SCLEROSIS; T-CELLS; CEREBROSPINAL-FLUID; INFECTION; BK; INDIVIDUALS; PREVALENCE; MECHANISMS	University of Munster; Oregon Health & Science University; Biogen; Columbia University; NewYork-Presbyterian Hospital; Columbia University; NewYork-Presbyterian Hospital	0	Cell Rep. Med.	JUL 16	2024	10.1016/j.xcrm.2024.101622	Cell Biology; Medicine, Research & Experimental	Cell Biology; Research & Experimental Medicine
scRNA-seq	Alzheimer’s disease	mice	postmortem brain	undisclosed	Gardner, RS; Kyle, M; Hughes, K; Zhao, LR	Gardner, Robert S.; Kyle, Michele; Hughes, Karen; Zhao, Li-Ru	Single-Cell RNA Sequencing Reveals Immunomodulatory Effects of Stem Cell Factor and Granulocyte Colony-Stimulating Factor Treatment in the Brains of Aged APP/PS1 Mice	BIOMOLECULES	Alzheimer's disease; hematopoietic growth factors; single-cell RNA sequencing; microglia; macrophages; myeloid cells; S100a8; S100a9	A-BETA CLEARANCE; FACTOR G-CSF; ALZHEIMERS-DISEASE; AMYLOID-BETA; COGNITIVE DECLINE; MICROGLIAL PHAGOCYTOSIS; NEUROPROTECTIVE ROLE; MEMORY IMPAIRMENT; DECREASED PLASMA; PLAQUE-FORMATION	State University of New York (SUNY) System; State University of New York (SUNY) Upstate Medical Center	0	Biomolecules	JUL	2024	10.3390/biom14070827	Biochemistry & Molecular Biology	Biochemistry & Molecular Biology
scRNA-seq	neuroinflammation	mice	retinas	GSE243992	Jiang, WB; Xiao, DC; Wu, C; Yang, JQ; Peng, XH; Chen, LF; Zhang, JM; Zha, GF; Li, W; Ju, R; Xiang, MQ; Xie, Z	Jiang, Wenbing; Xiao, Dongchang; Wu, Cheng; Yang, Jiaqi; Peng, Xinghua; Chen, Linfeng; Zhang, Jiamin; Zha, Gaofeng; Li, Wei; Ju, Rong; Xiang, Mengqing; Xie, Zhi	Circular RNA-based therapy provides sustained and robust neuroprotection for retinal ganglion cells	MOLECULAR THERAPY NUCLEIC ACIDS		NERVE GROWTH-FACTOR; LIPID NANOPARTICLE SIZE; NEUROTROPHIC FACTOR; MESSENGER-RNA; NGF; GLAUCOMA; GDNF; PEG	Sun Yat Sen University; Sun Yat Sen University; National Institutes of Health (NIH) - USA; NIH National Eye Institute (NEI); Sun Yat Sen University	0	Mol. Ther. Nucl. Acids	SEP 10	2024	10.1016/j.omtn.2024.102258	Medicine, Research & Experimental	Research & Experimental Medicine
scRNA-seq	multiple sclerosis	mice	cerebral blood vessels	GSE193533, GSE268079	Martinez, AN; Tortelote, GG; Pascale, CL; Ekanem, UOI; Leite, APD; Mccormack, IG; Dumont, AS	Martinez, Alejandra N.; Tortelote, Giovane G.; Pascale, Crissey L.; Ekanem, Uduak-Obong I.; Leite, Ana Paula de O.; Mccormack, Isabella G.; Dumont, Aaron S.	Dimethyl Fumarate Mediates Sustained Vascular Smooth Muscle Cell Remodeling in a Mouse Model of Cerebral Aneurysm	ANTIOXIDANTS	cerebral aneurysms; dimethyl fumarate; vascular smooth muscle cell; mitochondrial function; glutathione redox system	BARDOXOLONE METHYL; INJURY; PROLIFERATION; ACTIVATION; PROTEINS; FIBROSIS; NRF2	Tulane University; Tulane University; Tulane University	0	Antioxidants	JUL	2024	10.3390/antiox13070773	Biochemistry & Molecular Biology; Chemistry, Medicinal; Food Science & Technology	Biochemistry & Molecular Biology; Pharmacology & Pharmacy; Food Science & Technology
scRNA-seq	Alzheimer’s disease	mice	peripheral blood	GSE255662	Zhang, XL; He, GQ; Hu, YX; Liu, BR; Xu, YL; Li, X; Lv, XY; Li, J	Zhang, Xiaolin; He, Guiqin; Hu, Yixuan; Liu, Boren; Xu, Yuliang; Li, Xia; Lv, Xinyou; Li, Jin	Single cell transcriptome analysis identified a unique neutrophil type associated with Alzheimer's disease	IMMUNITY & AGEING	Alzheimer's disease; Neutrophils; Single cell RNA sequencing; CCRL2	GENE-EXPRESSION; TAU; PATHOLOGY; RECEPTOR; BRAINS; CCRL2	Shanghai Jiao Tong University; Chinese Academy of Sciences; Shanghai Institute of Materia Medica, CAS; Chinese Academy of Sciences; University of Chinese Academy of Sciences, CAS; Southern Medical University - China; Shanghai Jiao Tong University; Chinese Academy of Sciences; University of Science & Technology of China, CAS; Chinese Academy of Sciences; University of Science & Technology of China…	0	Immun. Ageing	JUN 25	2024	10.1186/s12979-024-00448-x	Geriatrics & Gerontology; Immunology	Geriatrics & Gerontology; Immunology
scRNA-seq	Alzheimer’s disease	human	peripheral blood	undisclosed	Sirkis, DW; Solsberg, CW; Johnson, TP; Bonham, LW; Oddi, AP; Geier, EG; Miller, BL; Rabinovici, GD; Yokoyama, JS	Sirkis, Daniel W.; Warly Solsberg, Caroline; Johnson, Taylor P.; Bonham, Luke W.; Oddi, Alexis P.; Geier, Ethan G.; Miller, Bruce L.; Rabinovici, Gil D.; Yokoyama, Jennifer S.	Expansion of highly interferon-responsive T cells in early-onset Alzheimer's disease	ALZHEIMERS & DEMENTIA	Alzheimer's disease; CD4 T cells; cerebrospinal fluid; droplet digital PCR; early-onset Alzheimer's disease; interferon; interferon signaling-associated gene; peripheral blood mononuclear cells; single-cell RNA-sequencing; T cells; tauopathy	DIAGNOSIS; MONOCYTES; DEMENTIA	University of California System; University of California San Francisco; University of California System; University of California San Francisco; National Institutes of Health (NIH) - USA; University of California System; University of California San Francisco; University of California System; University of California San Francisco	0	Alzheimers. Dement.	JUL	2024	10.1002/alz.13892	Clinical Neurology	Neurosciences & Neurology
scRNA-seq	neuroinflammation	fish	retinas	GSE255363, GSE255364	Bergmans, S; Noel, NCL; Masin, L; Harding, EG; Krzywanska, AM; De Schutter, JD; Ayana, R; Hu, CK; Arckens, L; Ruzycki, PA; MacDonald, RB; Clark, BS; Moons, L	Bergmans, Steven; Noel, Nicole C. L.; Masin, Luca; Harding, Ellen G.; Krzywanska, Aleksandra M.; De Schutter, Julie D.; Ayana, Rajagopal; Hu, Chi-Kuo; Arckens, Lut; Ruzycki, Philip A.; MacDonald, Ryan B.; Clark, Brian S.; Moons, Lieve	Age-related dysregulation of the retinal transcriptome in African turquoise killifish	AGING CELL	ageing; gliosis; inflammageing; neurodegeneration; Nothobranchius furzeri; oxidative stress; retina; transcriptomics	MULLER GLIA; GENE; SUSCEPTIBILITY; DEGENERATION; EXPRESSION; MUTATIONS; VARIANTS; CELLS; MODEL; FKBP5	KU Leuven; University of London; University College London; Washington University (WUSTL); KU Leuven; State University of New York (SUNY) System; State University of New York (SUNY) Stony Brook; Washington University (WUSTL); Washington University (WUSTL); Washington University (WUSTL)	0	Aging Cell	AUG	2024	10.1111/acel.14192	Cell Biology; Geriatrics & Gerontology	Cell Biology; Geriatrics & Gerontology
scRNA-seq	neuroinflammation	macaca mulatta	cerebral spinal fluid and blood	GSE221815, GSE261968, GSE261969	Elizaldi, SR; Hawes, CE; Verma, A; Lakshmanappa, YS; Dinasarapu, AR; Schlegel, BT; Rajasundaram, D; Li, J; Durbin-Johnson, BP; Ma, ZM; Pal, PB; Beckman, D; Ott, S; Raeman, R; Lifson, J; Morrison, JH; Iyer, SS	Elizaldi, Sonny R.; Hawes, Chase E.; Verma, Anil; Lakshmanappa, Yashavanth Shaan; Dinasarapu, Ashok R.; Schlegel, Brent T.; Rajasundaram, Dhivyaa; Li, Jie; Durbin-Johnson, Blythe P.; Ma, Zhong-Min; Pal, Pabitra B.; Beckman, Danielle; Ott, Sean; Raeman, Reben; Lifson, Jeffrey; Morrison, John H.; Iyer, Smita S.	Chronic SIV-Induced neuroinflammation disrupts CCR7+CD4+T cell immunosurveillance in the rhesus macaque brain	JOURNAL OF CLINICAL INVESTIGATION		CENTRAL-NERVOUS-SYSTEM; CD4(+) T-CELLS; CEREBROSPINAL-FLUID; MULTIPLE-SCLEROSIS; CHOROID-PLEXUS; MEMORY; EXPRESSION; CCR7; LEPTOMENINGES; TRAFFICKING	Pennsylvania Commonwealth System of Higher Education (PCSHE); University of Pittsburgh; Emory University; Pennsylvania Commonwealth System of Higher Education (PCSHE); University of Pittsburgh; National Institutes of Health (NIH) - USA; NIH National Cancer Institute (NCI); Frederick National Laboratory for Cancer Research; Gazi University	0	J. Clin. Invest.	MAY 1	2024	10.1172/JCI175332	Medicine, Research & Experimental	Research & Experimental Medicine
scRNA-seq;scATAC-seq	multiple sclerosis	human	postmortem brain	GSE138614	Elkjaer, ML; Hartebrodt, A; Oubounyt, M; Weber, A; Vitved, L; Reynolds, R; Thomassen, M; Rottger, R; Baumbach, J; Illes, Z	Elkjaer, Maria L.; Hartebrodt, Anne; Oubounyt, Mhaned; Weber, Anna; Vitved, Lars; Reynolds, Richard; Thomassen, Mads; Rottger, Richard; Baumbach, Jan; Illes, Zsolt	Single-Cell Multi-Omics Map of Cell Type-Specific Mechanistic Drivers of Multiple Sclerosis Lesions	NEUROLOGY-NEUROIMMUNOLOGY & NEUROINFLAMMATION		OLIGODENDROCYTES; DIFFERENTIATION; INFLAMMATION; PATHOLOGY; LINEAGE; PROTEIN; HEALTH	University of Southern Denmark; Odense University Hospital; University of Southern Denmark; University of Southern Denmark; University of Erlangen Nuremberg; University of Southern Denmark; University of Hamburg; Imperial College London; University of Southern Denmark	0	Neurol.-Neuroimmunol. Neuroinflammation	MAY	2024	10.1212/NXI.0000000000200213	Clinical Neurology; Neurosciences	Neurosciences & Neurology
scRNA-seq	multiple sclerosis	human	cerebral spinal fluid	undisclosed	Huth, A; Ayoub, I; Barateau, L; Gerdes, LA; Severac, D; Krebs, S; Blum, H; Tumani, H; Wildemann, B; Kümpfel, T; Beltr, E; Liblau, RS; Dauvilliers, Y; Dornmair, K	Huth, Alina; Ayoub, Ikram; Barateau, Lucie; Gerdes, Lisa Ann; Severac, Dany; Krebs, Stefan; Blum, Helmut; Tumani, Hayrettin; Wildemann, Brigitte; Kuempfel, Tania; Beltr, Eduardo; Liblau, Roland S.; Dauvilliers, Yves; Dornmair, Klaus	Single cell transcriptomics of cerebrospinal fluid cells from patients with recent-onset narcolepsy	JOURNAL OF AUTOIMMUNITY	Narcolepsy; T cells; Cerebrospinal fluid (CSF); Single -cell RNA sequencing (scRNAseq); Transcriptomics	SLEEP	University of Munich; University of Munich; Institut National de la Sante et de la Recherche Medicale (Inserm); Universite de Toulouse; Centre National de la Recherche Scientifique (CNRS); Universite de Montpellier; CHU de Montpellier; University of Munich; Institut National de la Sante et de la Recherche Medicale (Inserm); Centre National de la Recherche Scientifique (CNRS); Universite de Montpe…	0	J. Autoimmun.	JUN	2024	10.1016/j.jaut.2024.103234	Immunology	Immunology
scRNA-seq	Alzheimer’s disease	human	brain organoids	GSE244653	Haq, I; Ngo, JC; Roy, N; Pan, RL; Nawsheen, N; Chiu, R; Zhang, Y; Fujita, M; Soni, RK; Wu, XB; Bennett, DA; Menon, V; Olah, M; Sher, F	Haq, Imdadul; Ngo, Jason C.; Roy, Nainika; Pan, Richard L.; Nawsheen, Nadiya; Chiu, Rebecca; Zhang, Ya; Fujita, Masashi; Soni, Rajesh K.; Wu, Xuebing; Bennett, David A.; Menon, Vilas; Olah, Marta; Sher, Falak	An integrated toolkit for human microglia functional genomics	STEM CELL RESEARCH & THERAPY	Neurodegenerative diseases; Microglia; iPSC-derived microglia (iMG); Functional genomics; CRISPR; Chromatin accessibility (ATAC-Seq); Proteomics	PLURIPOTENT STEM-CELLS; ALZHEIMERS-DISEASE; RUSH MEMORY; DIFFERENTIATION; TRANSCRIPTION; MOUSE; MACROPHAGES; BETA; ATP; COMPLEMENT	Columbia University; Columbia University; Columbia University; Columbia University; NewYork-Presbyterian Hospital; Rush University; Columbia University; Columbia University; Columbia University	0	Stem Cell Res. Ther.	APR 10	2024	10.1186/s13287-024-03700-9	Cell & Tissue Engineering; Cell Biology; Medicine, Research & Experimental	Cell Biology; Research & Experimental Medicine
scRNA-seq	Alzheimer’s disease	human	cerebral spinal fluid	GSE252701	Kodali, MC; Antone, J; Alsop, E; Jayakumar, R; Parikh, K; Chiot, A; Sanchez-Molina, P; Ajami, B; Arnold, SE; Jensen, K; Das, S; Weinberg, MS	Kodali, Mahesh Chandra; Antone, Jerry; Alsop, Eric; Jayakumar, Rojashree; Parikh, Khushi; Chiot, Aude; Sanchez-Molina, Paula; Ajami, Bahareh; Arnold, Steven E.; Jensen, Kendall; Das, Sudeshna; Weinberg, Marc S.	Cryopreservation of cerebrospinal fluid cells preserves the transcriptional landscape for single-cell analysis	JOURNAL OF NEUROINFLAMMATION	Cerebrospinal fluid; Transcriptomics; 10x; Single-cell; Methods; Neuroimmunology; Omics; Alzheimer's disease	GENE-EXPRESSION	Harvard University; Massachusetts General Hospital; Harvard University; Harvard Medical School; Translational Genomics Research Institute; Oregon Health & Science University; Harvard University; Massachusetts General Hospital; Oregon Health & Science University	0	J. Neuroinflamm.	MAR 23	2024	10.1186/s12974-024-03047-1	Immunology; Neurosciences	Immunology; Neurosciences & Neurology
scRNA-seq	Alzheimer’s disease	mice	postmortem brain	GSE245035	Ali, M; Garcia, P; Lunkes, LP; Sciortino, A; Thomas, M; Heurtaux, T; Grzyb, K; Halder, R; Coowar, D; Skupin, A; Buée, L; Blum, D; Buttini, M; Glaab, E	Ali, Muhammad; Garcia, Pierre; Lunkes, Laetitia P.; Sciortino, Alessia; Thomas, Melanie; Heurtaux, Tony; Grzyb, Kamil; Halder, Rashi; Coowar, Djalil; Skupin, Alex; Buee, Luc; Blum, David; Buttini, Manuel; Glaab, Enrico	Single cell transcriptome analysis of the THY-Tau22 mouse model of Alzheimer's disease reveals sex-dependent dysregulations	CELL DEATH DISCOVERY		MYELIN BASIC-PROTEIN; TRANSGENIC MOUSE; AMYLOID PLAQUES; CHCHD2 GENE; BLOOD-BRAIN; HUMANIN; CORTEX; MICE; MEMORY; RISK	University of Luxembourg; University of Luxembourg; Universite de Lille; CHU Lille; Institut National de la Sante et de la Recherche Medicale (Inserm); Universite de Lille	0	Cell Death Discov.	MAR 7	2024	10.1038/s41420-024-01885-9	Cell Biology	Cell Biology
scRNA-seq	Alzheimer’s disease	human	peripheral blood	GSE181279	Liu, B; Luo, W; Huang, L; Wei, CY; Huang, XR; Liu, J; Tao, R; Mo, YM; Li, XB	Liu, Bo; Luo, Wei; Huang, Ling; Wei, Chunying; Huang, Xiaorui; Liu, Jun; Tao, Ran; Mo, Yingmin; Li, Xuebin	Migration Inhibition Factor Secreted by Peripheral Blood Memory B Cells Binding to CD74-CD44 Receptor Complex Drives Macrophage Behavior in Alzheimer's Disease	AMERICAN JOURNAL OF ALZHEIMERS DISEASE AND OTHER DEMENTIAS	migration inhibition factor; memory B cells; CD74-CD44 receptor complex; macrophages; alzheimer's disease	MIF SIGNAL-TRANSDUCTION; SURVIVAL; DEMENTIA; CD74; RISK	Jinan University; Guangxi Medical University; Youjiang Medical University for Nationalities; Youjiang Medical University for Nationalities; Youjiang Medical University for Nationalities	0	Am. J. Alzheimers Dis. Other Dement.	MAR	2024	10.1177/15333175241238577	Geriatrics & Gerontology; Clinical Neurology	Geriatrics & Gerontology; Neurosciences & Neurology
scRNA-seq	Alzheimer’s disease	human	peripheral blood	GSE226939	Oshima, T; Kater, MSJ; Huffels, CFM; Wesseling, EM; Middeldorp, J; Hol, EM; Verheijen, MHG; Smit, AB; Boddeke, EWGM; Eggen, BJL	Oshima, Takuya; Kater, Mandy S. J.; Huffels, Christiaan F. M.; Wesseling, Evelyn M.; Middeldorp, Jinte; Hol, Elly M.; Verheijen, Mark H. G.; Smit, August B.; Boddeke, Erik W. G. M.; Eggen, Bart J. L.	Early amyloid-induced changes in microglia gene expression in male APP/PS1 mice	JOURNAL OF NEUROSCIENCE RESEARCH	Alzheimer's disease; amyloid; microglia; neuroinflammation; RNA-seq; RRID:AB_313038; RRID:AB_313776; RRID:AB_465051; RRID:AB_467134; RRID:AB_839504; RRID:AB_2056966; RRID:AB_2336180; RRID:AB_2340593; RRID:AB_2563061; RRID:AB_2629529; RRID:AB_11203704	MUTATIONS; CYTOKINES; IRF8	University of Groningen; Vrije Universiteit Amsterdam; Utrecht University; Utrecht University Medical Center; University of Copenhagen; University of Groningen	0	J. Neurosci. Res.	MAR	2024	10.1002/jnr.25295	Neurosciences	Neurosciences & Neurology
scRNA-seq	Alzheimer’s disease	mice	postmortem brain, bone marrow, thyroid gland	GSE214917, GSE224575	Zhu, SY; Pang, YD; Zhang, XW; Yang, CY; Gao, JJ; Fang, P; Zhang, YH; Yao, YJ; Ju, FY; Ye, F; Zhu, HY; Liao, P; Yao, LF; Dai, LL; Xu, J; Wu, B; Pan, J; Wu, YJ	Zhu, Siyuan; Pang, Yidan; Zhang, Xiangwei; Yang, Chunying; Gao, Junjie; Fang, Ping; Zhang, Yaohui; Yao, Yunjin; Ju, Fangyu; Ye, Fang; Zhu, Hongyi; Liao, Peng; Yao, Lufeng; Dai, Lulu; Xu, Jun; Wu, Bo; Pan, Jun; Wu, Yijun	Alteration of Thyroid Hormones in Mouse Models of Alzheimer's Disease and Aging	NEUROENDOCRINOLOGY	Thyroid hormones; Alzheimer's disease; Aging; Inflammation; Hypothyroidism	GENE-EXPRESSION; RISK	Shanghai Jiao Tong University; Shanghai Jiao Tong University; Shandong First Medical University & Shandong Academy of Medical Sciences; Shanghai Jiao Tong University; Zhejiang University; Zhejiang University; Zhejiang University	0	Neuroendocrinology	JAN	2024	10.1159/000536089	Endocrinology & Metabolism; Neurosciences	Endocrinology & Metabolism; Neurosciences & Neurology
scRNA-seq	neuroinflammation	human	neural stem cells	undisclosed	Kim, YS; Seo, N; Kim, JH; Kang, S; Park, JW; Park, KD; Lee, HA; Park, M	Kim, Yoo Sung; Seo, Nari; Kim, Ji-Hye; Kang, Soyeong; Park, Ji Won; Park, Ki Dae; Lee, Hyang-Ae; Park, Misun	Exploring the Functional Heterogeneity of Directly Reprogrammed Neural Stem Cell-Derived Neurons via Single-Cell RNA Sequencing	CELLS	direct reprogramming; neural stem cells; iNSC-derived neuron; functional heterogeneity; single-cell RNA sequencing; surrogate biomarker; quality control	HUMAN FIBROBLASTS; SYNAPSES; PATTERNS	Ministry of Food & Drug Safety (MFDS), Republic of Korea; National Institute of Food & Drug Safety Evaluation; Korea Institute of Toxicology	0	Cells	DEC	2023	10.3390/cells12242818	Cell Biology	Cell Biology
scRNA-seq	Parkinson’s disease	human	human iPSCs	undisclosed	Kim, J; Daadi, EW; Daadi, ES; Oh, T; Deleidi, M; Daadi, MM	Kim, Jeffrey; Daadi, Etienne W.; Daadi, Elyas Sebastien; Oh, Thomas; Deleidi, Michela; Daadi, Marcel M.	LRRK2 Attenuates Antioxidant Response in Familial Parkinson's Disease Derived Neural Stem Cells	CELLS	induced pluripotent stem cells; neural stem cells; single cell transcriptomics; target identification; Parkinson's disease	KINASE 2 LRRK2; DIAGNOSTIC-CRITERIA; OXIDATIVE STRESS; G2019S; GLUTATHIONE; MUTATION; GENE; PHOSPHORYLATION; EXPRESSION; PATHOLOGY	Texas Biomedical Research Institute; Institut National de la Sante et de la Recherche Medicale (Inserm); Universite Paris Cite; University of Texas System; University of Texas Health Science Center at San Antonio	0	Cells	NOV	2023	10.3390/cells12212550	Cell Biology	Cell Biology
scRNA-seq;scATAC-seq	neuroinflammation	mice	retinas	GSE240465, GSE240312	Herrera, I; Fernandes, JAL; Shir-Mohammadi, K; Levesque, J; Mattar, P	Herrera, Ivana; Fernandes, Jose Alex Lourenco; Shir-Mohammadi, Khatereh; Levesque, Jasmine; Mattar, Pierre	Lamin A upregulation reorganizes the genome during rod photoreceptor degeneration	CELL DEATH & DISEASE		CONE PHOTORECEPTORS; HETEROCHROMATIN; CELLS; VISION; RETINA	University of Ottawa	0	Cell Death Dis.	OCT 25	2023	10.1038/s41419-023-06224-x	Cell Biology	Cell Biology
scRNA-seq	Parkinson’s disease	bumblebee	postmortem brain, bone marrow, thyroid gland	undisclosed	Chen, JT; Mu, XH; Liu, HL; Yong, QY; Ouyang, XM; Liu, Y; Zheng, L; Chen, H; Zhai, YF; Ma, J; Meng, L; Liu, SS; Zheng, H	Chen, Jieteng; Mu, Xiaohuan; Liu, Huiling; Yong, Qiyao; Ouyang, Xiaoman; Liu, Yan; Zheng, Li; Chen, Hao; Zhai, Yifan; Ma, Jie; Meng, Liang; Liu, Shanshan; Zheng, Hao	Rotenone impairs brain glial energetics and locomotor behavior in bumblebees	SCIENCE OF THE TOTAL ENVIRONMENT	Bumblebee; Rotenone; Single -nuclei sequencing; Glial cell; Dopaminergic neuron	SPORADIC PARKINSONS-DISEASE; SUBSTANTIA-NIGRA; OXALIC-ACID; MOUSE MODEL; MECHANISMS; DYSFUNCTION; MODULATION; HONEYBEES; EXPOSURE; FRUIT	Shandong Academy of Agricultural Sciences; China Agricultural University; Beijing Genomics Institute (BGI)	0	Sci. Total Environ.	JAN 10	2024	10.1016/j.scitotenv.2023.167870	Environmental Sciences	Environmental Sciences & Ecology
scRNA-seq	Alzheimer’s disease	human	human iPSCs	GSE239509	Jorfi, M; Park, J; Hall, CK; Lin, CCJ; Chen, M; von Maydell, D; Kruskop, JM; Kang, B; Choi, Y; Prokopenko, D; Irimia, D; Kim, DY; Tanzi, RE	Jorfi, Mehdi; Park, Joseph; Hall, Clare K.; Lin, Chih-Chung Jerry; Chen, Meng; von Maydell, Djuna; Kruskop, Jane M.; Kang, Byunghoon; Choi, Younjung; Prokopenko, Dmitry; Irimia, Daniel; Kim, Doo Yeon; Tanzi, Rudolph E.	Infiltrating CD8+ T cells exacerbate Alzheimer's disease pathology in a 3D human neuroimmune axis model	NATURE NEUROSCIENCE			Harvard University; Massachusetts General Hospital; Harvard University; Harvard Medical School; Harvard University; Massachusetts General Hospital	0	Nat. Neurosci.	SEP	2023		Neurosciences	Neurosciences & Neurology
scRNA-seq	neuroinflammation	mice	retinas	GSE212183	Dong, YJ; Yan, J; Xu, WR; Paquet-Durand, F; Hu, ZL; Jiao, KW	Dong, Yujie; Yan, Jie; Xu, Wenrong; Paquet-Durand, Francois; Hu, Zhulin; Jiao, Kangwei	HDAC inhibition delays photoreceptor loss in Pde6b mutant mice of retinitis pigmentosa: insights from scRNA-seq and CUT&Tag	PEERJ	Retinitis pigmentosa; Hereditary retinal neurodegenerative disorders; Photoreceptor cells; Histone deacetylases; Poly (ADP-ribose) polymerases; Cell death mechanisms	FUNCTIONAL-ASPECTS; CELL-DEATH; MECHANISMS; DEGENERATION; BIOLOGY; CANCER	Kunming Medical University; Yunnan University; Eberhard Karls University of Tubingen; Eberhard Karls University Hospital	0	PeerJ	JUL 12	2023	10.7717/peerj.15659	Multidisciplinary Sciences	Science & Technology - Other Topics
scRNA-seq;scATAC-seq	Parkinson’s disease		cell cultures	GSE225084	Boyd, RJ; McClymont, SA; Barrientos, NB; Hook, PW; Law, WD; Rose, RJ; Waite, EL; Rathinavelu, J; Avramopoulos, D; McCallion, AS	Boyd, Rachel J.; McClymont, Sarah A.; Barrientos, Nelson B.; Hook, Paul W.; Law, William D.; Rose, Rebecca J.; Waite, Eric L.; Rathinavelu, Jay; Avramopoulos, Dimitrios; McCallion, Andrew S.	Evaluating the mouse neural precursor line, SN4741, as a suitable proxy for midbrain dopaminergic neurons	BMC GENOMICS	Parkinson disease; Mouse-derived cell lines; Immortalized cell lines; Chromatin accessibility; RNA-seq; ATAC-seq; scRNA-seq; Genomic characterization; Disease-relevant model systems	INDUCED MITOCHONDRIAL DYSFUNCTION; PARKINSONS-DISEASE; TYROSINE-HYDROXYLASE; OXIDATIVE STRESS; BINDING PROTEINS; DNA-REPLICATION; CELL-DEATH; WEB SERVER; EXPRESSION; ENHANCERS	Johns Hopkins University; Johns Hopkins University	0	BMC Genomics	JUN 7	2023	10.1186/s12864-023-09398-y	Biotechnology & Applied Microbiology; Genetics & Heredity	Biotechnology & Applied Microbiology; Genetics & Heredity
scRNA-seq	neuroinflammation	mice	postmortem brain, bone marrow, thyroid gland	GSE98816, GSE133079, GSE225219.	Oliveira, F; Bondareva, O; Rodríguez-Aguilera, JR; Sheikh, BN	Oliveira, Fabiana; Bondareva, Olga; Rodriguez-Aguilera, Jesus Rafael; Sheikh, Bilal N.	Cultured brain pericytes adopt an immature phenotype and require endothelial cells for expression of canonical markers and ECM genes	FRONTIERS IN CELLULAR NEUROSCIENCE	brain; vasculature; pericytes; single cell RNA-seq; endothelial; extracellular matrix	MICROVASCULAR PERICYTES; ATLAS; ABLATION; ORIGIN	Helmholtz Association; Helmholtz-Center Munich - German Research Center for Environmental Health; Leipzig University	0	Front. Cell. Neurosci.	MAY 2	2023	10.3389/fncel.2023.1165887	Neurosciences	Neurosciences & Neurology
